# Supplementary material for: A cage-specific hydrate equilibrium model for robust predictions of industrially-relevant mixtures
Source: Royal Society of Chemistry journal article supplement (doi:10.1039/d3cp01465g), 2023-01-01
Supplement: d3cp01465g1.pdf [file d3cp01465g1.pdf]

## Supporting Information

### A Cage-Specific Hydrate Equilibrium Model for Robust Predictions of Industrially-Relevant Mixtures

David J. Zhu, Bruce W.E. Norris, Zachary M. Aman\*, Eric F. May\*

Fluid Science and Resources Division, The University of Western Australia, 35 Stirling Hwy  
Crawley WA 6009, Australia

\*Corresponding author

Zachary M. Aman email address: [zachary.aman@uwa.edu.au](mailto:zachary.aman@uwa.edu.au)

Eric F. May email address: [eric.may@uwa.edu.au](mailto:eric.may@uwa.edu.au)

#### Table of Contents

|                                                                      |    |
|----------------------------------------------------------------------|----|
| 1. Modelling details .....                                           | 3  |
| 1.1. Calculation of fugacity coefficients with CPA EOS .....         | 3  |
| 1.1.1. Association term of the CPA EOS .....                         | 5  |
| 1.2. Calculation of the Ideal Gas Gibbs Energy .....                 | 7  |
| 2. Breakdown of number of tuneable parameters .....                  | 9  |
| 2.1. Cavity-based model .....                                        | 10 |
| 2.2. Ballard and Sloan parameter breakdown .....                     | 11 |
| 2.2.1. Component-specific parameters .....                           | 12 |
| 2.3. Hielscher parameter breakdown .....                             | 14 |
| 2.3.1. Hydrate former specific parameters .....                      | 14 |
| 2.3.2. Double occupancy modelling .....                              | 15 |
| 3. Hydrate Equilibrium Database Tables .....                         | 16 |
| 3.1. Simple Hydrate Equilibria .....                                 | 17 |
| 3.1.1. CH <sub>4</sub> simple hydrate equilibria .....               | 17 |
| 3.1.2. C <sub>2</sub> H <sub>6</sub> simple hydrate equilibria ..... | 27 |
| 3.1.3. CO <sub>2</sub> simple hydrate equilibria .....               | 32 |

|                 |                                                                                                              |     |
|-----------------|--------------------------------------------------------------------------------------------------------------|-----|
| 3.1.4.          | C <sub>3</sub> H <sub>8</sub> simple hydrate equilibria.....                                                 | 42  |
| 3.1.5.          | N <sub>2</sub> simple hydrate equilibria .....                                                               | 45  |
| 3.1.6.          | H <sub>2</sub> S simple hydrate equilibria .....                                                             | 48  |
| 3.1.7.          | i-C <sub>4</sub> H <sub>10</sub> simple hydrate equilibria.....                                              | 50  |
| 3.2.            | Binary-gas-hydrate equilibria.....                                                                           | 52  |
| 3.2.1.          | CH <sub>4</sub> + C <sub>3</sub> H <sub>8</sub> binary- gas mixture hydrate equilibria.....                  | 52  |
| 3.2.2.          | CH <sub>4</sub> + C <sub>2</sub> H <sub>6</sub> binary-gas mixture hydrate equilibria.....                   | 54  |
| 3.2.3.          | C <sub>2</sub> H <sub>6</sub> + C <sub>3</sub> H <sub>8</sub> binary-gas mixture hydrate equilibria.....     | 57  |
| 3.2.4.          | CH <sub>4</sub> + CO <sub>2</sub> binary-gas mixture hydrate equilibria.....                                 | 59  |
| 3.2.5.          | C <sub>2</sub> H <sub>6</sub> + CO <sub>2</sub> binary-gas mixture hydrate equilibria.....                   | 64  |
| 3.2.6.          | C <sub>3</sub> H <sub>8</sub> + CO <sub>2</sub> binary-gas mixture hydrate equilibria.....                   | 64  |
| 3.2.1.          | CH <sub>4</sub> + N <sub>2</sub> binary-gas mixture hydrate equilibria.....                                  | 65  |
| 3.2.2.          | C <sub>3</sub> H <sub>8</sub> + N <sub>2</sub> binary-gas mixture hydrate equilibria.....                    | 67  |
| 3.2.3.          | N <sub>2</sub> + CO <sub>2</sub> binary-gas mixture hydrate equilibria.....                                  | 68  |
| 3.2.4.          | CH <sub>4</sub> + H <sub>2</sub> S binary-gas mixture hydrate equilibria .....                               | 72  |
| 3.2.5.          | CH <sub>4</sub> + n-C <sub>4</sub> H <sub>10</sub> binary-gas mixture hydrate equilibria .....               | 73  |
| 3.2.6.          | CH <sub>4</sub> + i-C <sub>4</sub> H <sub>10</sub> binary-gas mixture hydrate equilibria .....               | 75  |
| 3.2.7.          | C <sub>3</sub> H <sub>8</sub> + i-C <sub>4</sub> H <sub>10</sub> binary-gas mixture hydrate equilibria ..... | 77  |
| 3.2.8.          | CO <sub>2</sub> + i-C <sub>4</sub> H <sub>10</sub> binary-gas mixture hydrate equilibria .....               | 77  |
| 3.3.            | Ternary-gas and Multicomponent-gas hydrate equilibria .....                                                  | 78  |
| 3.4.            | Inhibited hydrate equilibria .....                                                                           | 88  |
| References..... |                                                                                                              | 101 |

## 1. Modelling details

### 1.1. Calculation of fugacity coefficients with CPA EOS

This section presents the equations required for the calculation of fluid phase fugacity coefficients with the CPA EOS. The methodology follows Michelsen and Mollerup<sup>1</sup> and Appendix 9C from Kontogeorgis and Folas<sup>2</sup>, as the EOS is no longer cubic due to the association term present. From classical thermodynamics the fugacity coefficient  $\varphi_i$  of a component  $i$  in a mixture is given by:

$$RT \ln \varphi_i = \left( \frac{\partial A^r}{\partial n_i} \right)_{T,V,n_j} - RT \ln Z \quad (S1)$$

$A^r$  is the residual Helmholtz energy of the mixture and  $Z$  is the compressibility factor:

$$Z = \frac{PV}{nRT} \quad (S2)$$

The CPA EOS combines the Soave-Redlich-Kwong EOS with the association term, derived from Wertheim's first-order perturbation theory. This means  $A^r$  has two contributions:

$$A^r(T, V, n) = A_{SRK}^r(T, V, n) + A_{association}^r(T, V, n) \quad (S3)$$

Michelsen and Mollerup<sup>1</sup> outline how the SRK term fugacity coefficient can be calculated:

$$\frac{A_{SRK}^r(T, V, n)}{RT} = -n \ln \left( 1 - \frac{B}{V} \right) - \frac{D(T)}{RTB} \ln \left( 1 + \frac{B}{V} \right) \quad (S4)$$

where  $V$  is the total volume of the system, while:

$$nB = n^2 b_{mix} = \sum_i n_i \sum_j n_j b_{ij} \quad (S5)$$

$$D(T) = n^2 a_{mix} = \sum_i n_i \sum_j a_{ij}(T) \quad (S6)$$

$$n = \sum_i n_i \quad (S7)$$

The classical van der Waals mixing rules are used for the energy term  $\alpha(T)$  and co-volume parameter  $b$ :

$$a_{ij}(T) = a_{ji}(T) = \sqrt{a_{ii}(T)a_{jj}(T)}(1 - k_{ij}) \quad (\text{S8})$$

$$b_{ij} = b_{ji} = \frac{1}{2}(b_{ii} + b_{jj}) \quad (\text{S9})$$

Therefore, using Equation S9 reduces Equation S5 to:

$$B = \sum_i n_i b_{ii} \quad (\text{S10})$$

Assuming that:

$$\frac{A_{SRK}^r(T, V, n)}{RT} = -n \ln \left(1 - \frac{B}{V}\right) - \frac{D(T)}{RTB} \ln \left(1 + \frac{B}{V}\right) = F^{SRK} \quad (\text{S11})$$

$$g(V, B) = \ln \left(1 - \frac{B}{V}\right) \quad (\text{S12})$$

$$f(V, B) = \frac{1}{RB} \ln \left(1 + \frac{B}{V}\right) \quad (\text{S13})$$

By substituting Equations S12 and S13 into Equation S11, the resulting equation for  $F^{SRK}$  is given as:

$$F^{SRK} = -ng(V, B) - \frac{D(T)}{T} f(V, B) \quad (\text{S14})$$

Hence, calculation of the fugacity coefficient  $\varphi_i$  of a component  $i$  for the SRK term requires the derivative of the function  $F^{SRK}$  :

$$\left(\frac{\partial F^{SRK}}{\partial n_i}\right)_{T, V, n_j} = F_n + F_B B_i + F_D D_i \quad (\text{S15})$$

where:

$$F_n = -g = -\ln \left(1 - \frac{B}{V}\right) \quad (\text{S16})$$

$$F_b = -ng_B - \frac{D(T)}{T} f_B \quad (\text{S17})$$

with:

$$g_B = -\frac{1}{(V - B)} \quad (\text{S18})$$

$$f_B = -\frac{f + Vf_V}{B} \quad (\text{S19})$$

$$f_V = -\frac{1}{RV(V + B)} \quad (\text{S20})$$

$$F_D = -\frac{f}{T} \quad (\text{S21})$$

$B_i$  and  $D_i$  are the composition derivatives of the energy term (Equation S6) and the co-volume term (Equation S10), and are given by the following equations:

$$B_i = \frac{2 \sum_j n_j b_{jj} - B}{n} \quad (\text{S22})$$

$$D_i = 2 \sum_j n_j a_{ij} \quad (\text{S23})$$

#### 1.1.1. Association term of the CPA EOS

The approach proposed by Michelsen and Hendriks<sup>3</sup> is used to estimate the contribution of the association term to the residual Helmholtz energy  $A_{association}^r(T, V, n)$ . They introduced a  $Q$  function for the calculation of the derived properties of the association term. This function takes advantage of the fact that the association contribution to the Helmholtz energy is itself the result of a minimisation:

$$Q(n, T, V, X) = \sum_i n_i \sum_{A_i} (\ln X_{A_i} - X_{A_i} + 1) - \frac{1}{2V} \sum_i \sum_j n_i n_j \sum_{A_i} \sum_{B_j} X_{A_i} X_{B_j} \partial^{A_i B_j} \quad (\text{S24})$$

In Equation S24,  $X_{A_i}$  is the fraction of  $A$  sites on molecule  $i$  that do not form bonds with other active sites,  $n$  is the total composition of the mixture and  $V$  is the total volume. The association conditions of the CPA EOS equals the value of  $Q$  at a stationary point with respect to the site fractions  $X$ . The stationary point representing these conditions is thus:

$$\frac{\partial Q}{\partial X_{A_i}} = 0, \quad \text{for all sites} \quad (\text{S25})$$

By differentiating Equation S24:

$$n_i \left( \frac{1}{X_{A_i}} - 1 \right) - \frac{1}{V} n_i \sum_j n_j \sum_{B_j} X_{B_j} \partial^{A_i B_j} = 0 \quad (\text{S26})$$

Which yields:

$$\frac{1}{X_{A_i}} = 1 + \frac{1}{V} \sum_j n_j \sum_{B_j} X_{B_j} \partial^{A_i B_j} \quad (\text{S27})$$

The value of  $Q$  at a stationary point (sp) is thus:

$$Q_{sp} = \sum_i n_i \sum_{A_i} (\ln X_{A_i} - X_{A_i} + 1) - \frac{1}{2} \sum_i n_i \sum_{A_i} X_{A_i} \left( \frac{1}{V} \sum_j n_j \sum_{B_j} \partial^{A_i B_j} \right) \quad (\text{S28})$$

$$\therefore Q_{sp} = \sum_i n_i \sum_{A_i} \left( \ln X_{A_i} - \frac{1}{2} X_{A_i} + \frac{1}{2} \right) = \frac{A_{association}^r(T, V, n)}{RT} \quad (\text{S29})$$

The chain rule is applied to calculate the fugacity coefficient from the association term. The derivative of  $Q_{sp}$  with respect to  $n_i$  is given by the following expression:

$$\frac{\partial Q_{sp}}{\partial n_i} = \frac{\partial Q}{\partial n_i} \Big|_X + \sum_i \sum_{A_i} \frac{\partial Q}{\partial X_{A_i}} \frac{\partial X_{A_i}}{\partial n_i} \quad (\text{S30})$$

However, at the stationary point, the derivatives  $\partial Q / \partial X_{A_i}$  are by definition zero, meaning that the fugacity coefficient can now be calculated using the explicit derivative of  $Q$  with respect to  $n_i$ :

$$\begin{aligned} \frac{\partial}{\partial n_i} \left( \frac{A_{association}^r}{RT} \right)_{T,V,n_j} &= \frac{\partial}{\partial n_i} \left( \sum_i n_i \sum_{A_i} (\ln X_{A_i} - X_{A_i} + 1) - \frac{1}{2V} \sum_i \sum_j n_i n_j \sum_{A_i} \sum_{B_j} \Delta^{A_i B_j} \right)_{T,V,n_j} \\ &= \sum_{A_i} (\ln X_{A_i} - X_{A_i} + 1) - \frac{1}{2V} \frac{\partial}{\partial n_i} \Big|_{\Delta} \left( \sum_i \sum_j n_i n_j \sum_{A_i} \sum_{B_j} X_{A_i} X_{B_j} \Delta^{A_i B_j} \right) \\ &\quad - \frac{1}{2V} \sum_i \sum_j n_i n_j \sum_{A_i} \sum_{B_j} X_{A_i} X_{B_j} \frac{\partial \Delta^{A_i B_j}}{\partial n_i} \end{aligned} \quad (\text{S31})$$

When the yielding equation is combined with Equation S27 and after some algebra:

$$\begin{aligned}
& \frac{\partial}{\partial n_i} \left( \frac{A_{association}^r}{RT} \right)_{T,V,n_j} \\
&= \sum_{A_i} \ln X_{A_i} - \frac{1}{2V} \sum_i \sum_j n_i n_j \sum_{A_i} \sum_{B_j} X_{A_i} X_{B_j} \frac{\partial \Delta^{A_i B_j}}{\partial n_i}
\end{aligned} \quad (S32)$$

The derivative  $\partial \Delta^{A_i B_j} / \partial n_i$  is given by the following equation:

$$\frac{\partial \Delta^{A_i B_j}}{\partial n_i} = \Delta^{A_i B_j} \frac{\partial \ln g}{\partial n_i} \quad (S33)$$

Combining Equation S32 with S33 gives:

$$\begin{aligned}
& \frac{\partial}{\partial n_i} \left( \frac{A_{association}^r}{RT} \right)_{T,V,n_j} \\
&= \sum_{A_i} \ln X_{A_i} - \frac{1}{2V} \sum_i \sum_j n_i n_j \sum_{A_i} \sum_{B_j} X_{A_i} X_{B_j} \Delta^{A_i B_j} \frac{\partial \ln g}{\partial n_i}
\end{aligned} \quad (S34)$$

Combining Equation S34 with S27 yields the final equation:

$$\frac{\partial}{\partial n_i} \left( \frac{A_{association}^r}{RT} \right) = \sum_{X_{A_i}} \ln X_{A_i} - \frac{1}{2} \sum_i n_i \sum_{A_i} (1 - X_{A_i}) \frac{\partial \ln g}{\partial n_i} \quad (S35)$$

Therefore, for the calculation of the contribution of the association term, the derivative of  $g$  with respect to  $n_i$  is required. Given that for the CPA EOS:

$$g(V, n) = \frac{1}{1 - 1.9\eta}, \quad \text{where} \quad \eta = \frac{B}{4V} \quad (S36)$$

and  $B$  is given by Equation S10, then:

$$\frac{\partial g}{\partial n_i} = \frac{\partial g}{\partial B} B_i \quad (S37)$$

where  $B_i$  can be calculated from Equation S22, while:

$$\frac{\partial g}{\partial B} = 0.475V \left( \frac{1}{V - 0.475B} \right)^2 \quad (S38)$$

## 1.2. Calculation of the Ideal Gas Gibbs Energy

The ideal gas Gibbs energy of pure water is calculated using the following expression, which is general to any component:

$$\frac{g_{w,o}}{RT} = \frac{g_{w_0,o}}{RT_0} - \int_{T_0}^T \frac{h_{w,o}}{RT^2} dT \quad (\text{S39})$$

Where  $g_{w_0,o}$  is the molar Gibbs energy of formation at  $T_0$  and  $P_0$ . The enthalpy of the ideal gases is:

$$h_{w,o} = h_{w_0,o} + \int_{T_0}^T c_{P,w} dT \quad (\text{S40})$$

Where  $h_{w_0,o}$  is the molar enthalpy of formation at  $T_0, P_0$ , and  $c_{P,w}$  is the heat capacity, which is of the form:

$$c_{P,w} = a_0 + a_1T + a_2T^2 + a_3^3 \quad (\text{S41})$$

Note that for the Gibbs energy and enthalpy of formation, a different reference state of  $T_0 = 298.15$  K and  $P_0 = 1$  bar is used. Table S1 below lists the constants used for calculating the water ideal gas Gibbs energy and the ideal gas heat capacity parameters.

Table S1: Ideal gas formation properties and heat capacity parameters for Equations S39, S40 and S41<sup>4</sup>.

| Parameter           | Value (Water) |
|---------------------|---------------|
| $g_{w_0,o}$ (J/mol) | -228700       |
| $h_{w_0,o}$ (J/mol) | -242000       |
| $a_0/R$             | 3.8747        |
| $a_1/R$             | 0.0231        |
| $a_2/R$             | 0.1269        |
| $a_3/R$             | -0.4321       |

### 1.3. Calculation of the ice-phase fugacity

The equation used to calculate the fugacity of pure water in its solid (ice) phase, or for any pure component  $i$  in its solid phase, is given as:

$$\ln(f_{is}^S) = \ln(\varphi_{pure,i}^L P) - \frac{\Delta H_{f,i}}{RT_{m,i}} \left[ \frac{T_{m,i}}{T} - 1 \right] + \frac{\Delta C_{p,i}^{L \rightarrow S}}{R} \left[ \frac{T_{m,i}}{T} - 1 + \ln \left( \frac{T}{T_{m,i}} \right) \right] - \frac{\Delta v_i^{L \rightarrow S} (P - P_m)}{RT}$$



Where  $\varphi_{pure,i}^L$  is the fugacity coefficient of pure component  $i$  in the liquid phase calculated with the CPA EOS;  $T_{m,i}$  is the melting temperature of pure component  $i$ ;  $\Delta H_{f,i}$  is the corresponding molar heat of fusion at  $T_{m,i}$ ;  $\Delta C_{p,i}^{L \rightarrow S}$  is the molar specific heat of the component as a pure liquid minus that of the pure solid  $i$ , which is approximated as independent of the temperature;  $\Delta v_i^{L \rightarrow S}$  is the change in volume between the liquid and solid phase of component  $i$ ; and  $P_m$  is a reference pressure for the given melting temperature, which in this case is atmospheric pressure. (or any given pure component  $i$ )

## 2. Breakdown of number of tuneable parameters

This section gives a detailed breakdown of the number of tuneable parameters for each of the hydrate models considered in this work: the proposed cavity-based approach, Ballard and Sloan, and the Hielscher et al. model. The types of parameters can be broadly classified as either universal/(hydrate)-structure dependent, or component-specific i.e. dependent on the hydrate formers considered.

When comparing the hydrate-former dependent parameters between Ballard and Sloan and the cavity-based approach, we consider the following hydrate-forming components only from Ballard and Sloan:

1. Methane
2. Ethane
3. Propane
4. Isobutane
5. n-Butane
6. Carbon Dioxide
7. Nitrogen
8. Hydrogen Sulfide

For the Hielscher et al. model, since not all the aforementioned formers are available, the eight formers included in their model are considered:

1. Methane
2. Ethane
3. Propane
4. Argon
5. Oxygen
6. Carbon Monoxide
7. Carbon Dioxide
8. Nitrogen

### 2.1. Cavity-based model

The proposed cavity-based model has the following universal/structure-dependent parameters, as summarised in Table S2.

Table S2: Breakdown of the sources of universal model parameters and the final total for the proposed cavity-based hydrate model.

| Description                                                  | Number of Parameters                               | Parameter symbols              |
|--------------------------------------------------------------|----------------------------------------------------|--------------------------------|
| Reference Gibbs Energy and Enthalpy of Empty Hydrate Lattice | $2 \times 2 = 4$ (2 per hydrate structure)         | $g_{w,0}^\beta, h_{w,0}^\beta$ |
| Thermal expansion of hydrate lattice                         | $3 \times 2 = 6$ (3 per hydrate structure)         | $\alpha_1, \alpha_2, \alpha_3$ |
| Reference lattice parameters                                 | 2                                                  | $a_{0,ref}$                    |
| Compressibility of hydrate lattice                           | 2                                                  | $B_0, B_0'$                    |
| Cavity radii and coordination numbers                        | $2 \times 3 = 6$ (2 parameters for 3 cavity types) | $R_i, z_i$                     |
| <b>Total</b>                                                 | <b>20</b>                                          | -                              |

The component-specific parameters in this model are solely the Kihara Potential Parameters (KPP)  $a_{c,i,J}$ ,  $\sigma_{i,J}$ , and  $\frac{\epsilon_{i,J}}{k_B}$ , for each hydrate former  $J$  and cavity type  $i$ . Since we consider three cavity types  $5^{12}$ ,  $5^{12}6^2$  and  $5^{12}6^4$ , for  $n$  hydrate formers considered, we have a conservative estimate of  $9n + 20$  parameters. When we consider  $n = 8$  hydrate formers, this leads to a

conservative total of 92 parameters. However, in practice, there will often be components where only one set of cavity-specific parameters are required; for example, propane only occupies the large  $5^{12}6^4$  sII large cavity and thus only has three KPP instead of the full nine per former. Additionally, in this implementation, we keep the hard core radius  $a_{c,i,J}$  consistent between each of the cavity-specific parameter sets, which reduces the  $a_c$  values needed per hydrate former from three to one. Therefore, this model has a more realistic estimate of  $7n + 20$  parameters; for 8 hydrate formers considered, this would total 76 parameters.

A precise count of the number of Kihara potential parameters required based on the tuned parameters in Table 12 of the main article yields a total of 44 parameters. Combined with the 20 universal/structure-based parameters, the total number of tuneable parameters for the cavity-based model is 64.

## 2.2. Ballard and Sloan parameter breakdown

Table S3 shows the breakdown of universal/structure-dependent parameters for the Ballard and Sloan hydrate model. A large number of these parameters come from the multi-layered shell approach used by BALLARD AND SLOAN: the values used in their work are shown in Table S4.

Table S3: Breakdown of the sources of universal model parameters and the final total for the Ballard and Sloan model.

| Description                                                  | Number of Parameters                       | Parameter symbols                    |
|--------------------------------------------------------------|--------------------------------------------|--------------------------------------|
| Reference Gibbs Energy and Enthalpy of Empty Hydrate Lattice | $4 \times 2 = 8$ (2 per hydrate structure) | $g_{w,0}^\beta, h_{w,0}^\beta, a, b$ |
| Thermal expansion of hydrate lattice                         | $3 \times 2 = 6$ (3 per hydrate structure) | $\alpha_1, \alpha_2, \alpha_3$       |
| Cavity radii and coordination numbers                        | 24 for multilayered shell (Table S4)       | $R_i, z_i$                           |
| <b>Total</b>                                                 | <b>38</b>                                  | -                                    |

Table S4: Coordination numbers  $z_i$  and shell radii  $R_i$  assuming the guest molecule interacts with the first water shell, which is subdivided into four possible layers<sup>5</sup>

| Cavity     | First Layer            |       | Second Layer           |       | Third Layer            |       | Fourth Layer           |       |
|------------|------------------------|-------|------------------------|-------|------------------------|-------|------------------------|-------|
|            | $R_{i,1} / \text{\AA}$ | $z_1$ | $R_{i,2} / \text{\AA}$ | $z_2$ | $R_{i,3} / \text{\AA}$ | $z_3$ | $R_{i,4} / \text{\AA}$ | $z_4$ |
| sI, small  | 3.83                   | 8     | 3.96                   | 12    |                        |       |                        |       |
| sI, large  | 4.06                   | 8     | 4.25                   | 4     | 4.47                   | 8     | 4.645                  | 4     |
| sII, small | 3.748                  | 2     | 3.845                  | 6     | 3.956                  | 12    |                        |       |
| sII, large | 4.635                  | 12    | 4.715                  | 12    | 4.729                  | 4     |                        |       |

The source of the additional  $a$  and  $b$  parameters come from the additional activity coefficient of the hydrate that Ballard and Sloan use to describe the chemical potential of water in the hydrate phase, which is described in their work as:

$$\mu_w^H = g_w^\beta + RT \sum_i v_i \ln \left( 1 - \sum_J \theta_{i,J} \right) + \ln \gamma_w^H \quad (\text{S42})$$

where

$$\ln \gamma_w^H = \frac{\Delta g_{w,0}^\beta}{RT_0} + \frac{\Delta h_{w,0}^\beta}{R} \left( \frac{1}{T} - \frac{1}{T_0} \right) + \int_{P_0}^P \frac{\Delta v_H}{RT} dP \quad (\text{S43})$$

The terms  $\frac{\Delta g_{w,0}^\beta}{RT_0}$  and  $\frac{\Delta h_{w,0}^\beta}{R}$  represent the perturbed Gibbs energy and enthalpy of formation from the change of hydrate volume from the standard state lattices that Ballard and Sloan proposed to the volume of the real hydrate. These were assumed to be linear in this change of volume  $\Delta v_{H_0}$ :

$$\Delta g_{w,0}^\beta = a \Delta v_{H_0} \quad \text{and} \quad \Delta h_{w,0}^\beta = b \Delta v_{H_0} \quad (\text{S44})$$

These parameters  $a$  and  $b$  are structure-specific, resulting in a total of  $2 \times 2 = 4$  parameters.

### 2.2.1. Component-specific parameters

The component-specific parameters involved in the Ballard and Sloan are more involved and are summarised in Table S5.

Table S5: Breakdown of hydrate-former dependent parameters' source and number for the Ballard and Sloan model. The total number of parameters is considered for  $n = 8$  hydrate formers

| Description                                                | Number of Parameters                            | Parameter symbols                   |
|------------------------------------------------------------|-------------------------------------------------|-------------------------------------|
| Kihara Potential Parameters                                | $3n = 24$                                       | $a_c, \sigma, \frac{\epsilon}{k_B}$ |
| Compressibility of hydrate lattice                         | Max of $2n \rightarrow 14$ for 8 formers in B&S | $\kappa$                            |
| Repulsive constants for Cavity radius/coordination numbers | Max of $4n \rightarrow 19$ for 8 formers in B&S | $\Delta r_{i,J}$                    |
| Guest molecular diameter                                   | $n = 8$                                         | $D_J$                               |
| <b>Total</b>                                               | <b>65</b>                                       | -                                   |

While Ballard and Sloan only use one set of Kihara potential parameters across all cavities and structures, the complexity comes from their description of hydrate volume compressibility, which is former-specific, and the use of repulsive constants in calculating the volume of the standard hydrate  $v_0$  at  $T_0$  and  $P_0$ :

$$v_0(\bar{x}) = \left( a_0 * + \sum_i N_i \sum_i f(\theta_{i,J}) \Delta r_{i,J} \right) \quad (\text{S45})$$

where  $\Delta r_{i,J}$  is the aforementioned repulsive constant for guest molecule  $J$  in hydrate cavity type  $i$ . Each hydrate former can have up to four possible  $\Delta r$  parameters: for the sI small, sI large, sII small, and sII large cavities that Ballard and Sloan consider, though in practice, no hydrate former has more than three non-zero  $\Delta r$  parameters<sup>4</sup>. The function  $f(\theta_{i,J})$  is defined for the 5<sup>12</sup> hydrate cage as:

$$f(\theta_{i,J}) = \frac{(1 + \eta_i)\theta_{i,J}}{1 + \eta_i\theta_{i,J}} \exp[D_J - \bar{D}] \quad (\text{S46})$$

where  $D_J$  is the molecular diameter of component  $J$ ,  $\bar{D}$  is the fractional occupancy average molecular diameter of the guest molecules in the hydrate, and  $\eta_i$  is the coordination number of cavity  $i$  ( $z_i$ ) per water molecule in the hydrate  $N_w$ . Here,  $D_J$  incurs an additional set of parameters per hydrate former considered.

The compressibility parameter  $\kappa$  is used in the expression for the hydrate volume of Ballard and Sloan, which is structure-dependent:

$$v_H = v_0 \exp[\alpha_1(T - T_0) + \alpha_2(T - T_0)^2 + \alpha_3(T - T_0)^3 - \kappa(P - P_0)] \quad (\text{S47})$$

Thus, hydrate formers that can form both sI and sII hydrates (methane, ethane, CO<sub>2</sub>) will have two parameters covering these structures, while formers such as propane, n-butane, i-butane will have one. Thus, the maximum number of parameters associated is  $2n$  for  $n$  hydrate formers, while the actual parameter count will vary with the hydrate formers considered.

### 2.3. Hielscher parameter breakdown

Table S6 summarises the universal/structure-dependent parameters for the Hielscher model. As the cavity-based approach uses the Hielscher model as a base, it shares many similarities in the universal parameters for the empty hydrate lattice. The key difference from Table S2 is the removal of the multilayered shell description and the simplification of the reference lattice parameters to be independent of the hydrate former.

Table S6: Breakdown of the number universal parameters and their source in the Hielscher et al. hydrate model.

| Description                                                  | Number of Parameters                       | Parameter symbols                  |
|--------------------------------------------------------------|--------------------------------------------|------------------------------------|
| Reference Gibbs Energy and Enthalpy of Empty Hydrate Lattice | $2 \times 2 = 4$ (2 per hydrate structure) | $g_{w,0}^{\beta}, h_{w,0}^{\beta}$ |
| Thermal expansion of hydrate lattice                         | $3 \times 2 = 6$ (3 per hydrate structure) | $\alpha_1, \alpha_2, \alpha_3$     |
| Compressibility of hydrate lattice                           | 2                                          | $B_0, B_0'$                        |
| Cavity radii and coordination numbers                        | 24 for multilayered shell (Table S4)       | $R_i, z_i$                         |
| <b>Total</b>                                                 | <b>36</b>                                  | -                                  |

#### 2.3.1. Hydrate former specific parameters

Table S7 summarises the parameters that are dependent of the hydrate formers considered for the Hielscher model.

Table S7: Breakdown of the number of hydrate former specific parameters and their source in the Hielscher et al. model. The total number of parameters is considered for  $n = 8$  hydrate formers. It must be noted that the Hielscher et al. model also considers double occupancy of

hydrates, which adds a significant number of parameters; for fairness, these are excluded in the comparisons in the main paper.

| Description                           | Number of Parameters                                                | Parameter symbols                                       |
|---------------------------------------|---------------------------------------------------------------------|---------------------------------------------------------|
| Kihara Potential Parameters           | $2 \times 3n = 6n \rightarrow$ excluding $a_c$ repeat:<br>$5n = 40$ | $a_c, \sigma, \frac{\epsilon}{k_B}$                     |
| Reference Lattice Parameters          | $2 \times n = 2n = 16$ ( $n$ per hydrate structure)                 | $a_{0,J}^\beta$                                         |
| Double occupancy parameters           | $2 \times 3n = 6n = 48$ per hydrate structure                       | $r_{vdw,J}, \sigma_J^{gg}, \frac{\epsilon_J^{gg}}{k_B}$ |
| <b>Total without double occupancy</b> | <b>56</b>                                                           | -                                                       |
| <b>Total with double occupancy</b>    | <b>104</b>                                                          | -                                                       |

The KPP sets are taken directly from Hielscher's thesis<sup>6</sup>, which lists two independent sets of KPPs specific to sI and sII hydrates. Given that  $a_c$  is kept constant between the two structures, for parameters  $\sigma_{i,J}$  and  $\left(\frac{\epsilon}{k_B}\right)_{i,J}$  for structure type  $i$  and hydrate former  $J$  yields a total of  $5n$  parameters for  $n$  hydrate formers considered. When considering  $n = 8$  hydrate formers, this leads to a total of 40 parameters.

### 2.3.2. Double occupancy modelling

The extension of the Hielscher model to capture double occupancy of hydrate cavities in Hielscher et al.<sup>7</sup> adds a significant amount of component-specific tuneable parameters. Each hydrate former  $J$  has additional parameters  $r_{vdw,J}, \sigma_J^{gg}$  and  $\epsilon_J^{gg}$  to account for the double-occupancy contribution towards the fractional occupancy of the hydrate former,  $\theta_{i,J}$ . Furthermore, these parameters are structure-specific as well, which results in an additional total of  $2 \times 3n = 6n$  parameters for  $n$  hydrate formers considered. For  $n = 8$  hydrate formers, this leads to an additional 48 parameters associated with double occupancy modelling.

### 3. Hydrate Equilibrium Database Tables

This section shows the breakdown of datasets use for training the new cavity-based hydrate model and evaluating the model's performance against unseen data. It also includes the absolute average deviation of temperature (AADT) for each data set considered, including the predictions from both CPA-Hydrates as implemented in MultiFlash 7.0 (CPAHYD-MF), and Ballard and Sloan (B&S), as implemented in CSMGem 2007 (v1.1). Table S8 summarises the basic nomenclature used for the 'Phases' column of the following database tables.

Table S8: Nomenclature of phase types used in Database Tables

| <b>Phase types</b> | <b>Description</b>       |
|--------------------|--------------------------|
| Lw                 | Liquid water phase       |
| H                  | Hydrate phase            |
| V                  | Vapour phase             |
| I                  | Ice phase                |
| LHC                | Liquid hydrocarbon phase |

Accompanying these datasets are figures showcasing the hydrate equilibrium data from most of the datasets (but not all of them). For visual clarity, only the model predictions from this work and MultiFlash will be plotted on these figures alongside the experimental data as black and red solid lines, respectively. Where applicable, distinct phases within a given dataset will be represented with different linetypes e.g. solid, dashed, dotted etc.



## 3.1. Simple Hydrate Equilibria

### 3.1.1. CH<sub>4</sub> simple hydrate equilibria

Table S9: Database of CH<sub>4</sub> simple hydrate equilibrium data, with comparison of the AADT of the cavity-based model against CPAHYD-MF and B&S. Data Types: "Tr" = Training Data; "Te" = Test Data.

| Reference                                        | Phases | AADT (K) | CPAHYD-MF AADT (K) | B&S AADT (K) | T <sub>min</sub> (K) | T <sub>max</sub> (K) | P <sub>min</sub> (MPa) | P <sub>max</sub> (MPa) | N  | Type |
|--------------------------------------------------|--------|----------|--------------------|--------------|----------------------|----------------------|------------------------|------------------------|----|------|
| Adisasmito et al. (1991) <sup>8</sup>            | Lw-H-V | 0.106    | 0.105              | 0.109        | 273.4                | 286.4                | 2.68                   | 10.57                  | 11 | Tr   |
| Aghajanloo et al. (2020) <sup>9</sup>            | Lw-H-V | 0.098    | 0.106              | 0.075        | 283.1                | 288.4                | 7.13                   | 13.16                  | 7  | Tr   |
| Blanc and Tournier-Lasserre (1990) <sup>10</sup> | Lw-H-V | 0.235    | 0.225              | 0.259        | 279.65               | 305.15               | 5                      | 92                     | 12 | Te   |
| Bottger et al. (2016) <sup>11</sup>              | Lw-H-V | 0.117    | 0.055              | 0.125        | 274.19               | 285.14               | 2.945                  | 8.895                  | 13 | Te   |
| Chen et al. (2009) <sup>12</sup>                 | Lw-H-V | 0.201    | 0.158              | 0.167        | 276.95               | 286.85               | 3.88                   | 11.08                  | 6  | Te   |
| Clarke and Bishnoi (2001) <sup>13</sup>          | Lw-H-V | 1.023    | 0.945              | 1.042        | 274.65               | 281.15               | 3.187                  | 7.487                  | 21 | Te   |
| de Menezes et al. (2020) <sup>14</sup>           | Lw-H-V | 0.393    | 0.786              | 0.324        | 281.01               | 305.26               | 5.5                    | 100                    | 11 | Tr   |
| de Roo et al. (1983) <sup>15</sup>               | Lw-H-V | 0.212    | 0.184              | 0.186        | 273.3                | 286                  | 2.69                   | 10.04                  | 9  | Te   |
| Deaton and Frost (1946) <sup>16</sup>            | Lw-H-V | 0.066    | 0.132              | 0.060        | 273.7                | 285.9                | 2.77                   | 9.78                   | 13 | Te   |
| Deng et al. (1993) <sup>17</sup>                 | Lw-H-V | 0.256    | 0.279              | 0.201        | 274.9                | 284.85               | 3                      | 9                      | 5  | Te   |
| Dickens et al. (1994) <sup>18</sup>              | Lw-H-V | 0.154    | 0.186              | 0.154        | 276.1                | 285.4                | 3.45                   | 9.58                   | 7  | Te   |
| Dyadin and Aladko (1996) <sup>19</sup>           | Lw-H-V | 0.609    | 0.817              | 0.590        | 287                  | 308.6                | 8                      | 133                    | 6  | Te   |
| Galloway et al. (1970) <sup>20</sup>             | Lw-H-V | 0.188    | 0.193              | 0.272        | 283.2                | 288.7                | 7.1                    | 13.11                  | 4  | Te   |
| Gayet et al. (2005) <sup>21</sup>                | Lw-H-V | 0.116    | 0.151              | 0.076        | 275.15               | 300.15               | 3.17                   | 54.53                  | 26 | Tr   |
| Guo et al. (1992) <sup>22</sup>                  | Lw-H-V | 0.106    | 0.105              | 0.109        | 273.4                | 286.4                | 2.68                   | 10.57                  | 11 | Te   |
| Hachikubo et al. (2002) <sup>23</sup>            | Lw-H-V | 1.148    | 0.863              | 1.721        | 268.4                | 271.28               | 2.324                  | 2.527                  | 2  | Te   |
| Hu et al. (2017a) <sup>24</sup>                  | Lw-H-V | 0.317    | 0.662              | 0.178        | 295.75               | 309.85               | 34.3                   | 150.1                  | 5  | Te   |
| Hu et al. (2017b) <sup>25</sup>                  | Lw-H-V | 0.317    | 0.662              | 0.178        | 295.75               | 309.85               | 34.3                   | 150.13                 | 5  | Te   |
| Hutz and Englezos (1996) <sup>26</sup>           | Lw-H-V | 0.215    | 0.199              | 0.190        | 274.6                | 285.35               | 3.021                  | 9.35                   | 7  | Te   |
| Jager (2001) <sup>27</sup>                       | Lw-H-V | 0.398    | 0.581              | 0.363        | 278.1                | 302.1                | 4.05                   | 72.85                  | 11 | Tr   |
| Jager and Sloan (2001) <sup>28</sup>             | Lw-H-V | 0.312    | 0.371              | 0.309        | 291.86               | 303.48               | 20.19                  | 72.26                  | 12 | Tr   |
| Javanmardi et al. (2012) <sup>29</sup>           | Lw-H-V | 0.159    | 0.240              | 0.155        | 274.7                | 282                  | 3.05                   | 6.29                   | 7  | Te   |
| Jhaveri and Robinson (1965) <sup>30</sup>        | Lw-H-V | 0.211    | 0.232              | 0.162        | 273.2                | 294.3                | 2.65                   | 28.57                  | 8  | Te   |
| Kamari et al. (2017) <sup>31</sup>               | Lw-H-V | 0.040    | 0.063              | 0.060        | 274.3                | 285.8                | 2.92                   | 9.54                   | 17 | Tr   |
| Kharrat and Dalmazzone (2003) <sup>32</sup>      | Lw-H-V | 0.246    | 0.282              | 0.294        | 281.2                | 284                  | 5.73                   | 7.68                   | 3  | Te   |
| Kobayashi and Katz (1949) <sup>33</sup>          | Lw-H-V | 0.347    | 0.532              | 0.271        | 295.7                | 295.9                | 33.99                  | 35.3                   | 2  | Te   |
| Komai et al. (1997) <sup>34</sup>                | Lw-H-V | 0.332    | 0.369              | 0.323        | 278.15               | 291.15               | 4.2                    | 18.6                   | 8  | Te   |

| Reference                                                    | Phases | AADT (K) | CPAHYD-MF AADT (K) | B&S AADT (K) | $T_{min}$ (K) | $T_{max}$ (K) | $P_{min}$ (MPa) | $P_{max}$ (MPa) | $N$ | Type |
|--------------------------------------------------------------|--------|----------|--------------------|--------------|---------------|---------------|-----------------|-----------------|-----|------|
| Lafond et al. (2012) <sup>35</sup>                           | Lw-H-V | 0.050    | 0.074              | 0.084        | 279.72        | 285.2         | 5               | 9               | 5   | Te   |
| Lim et al. (2017) <sup>36</sup>                              | Lw-H-V | 0.190    | 0.203              | 0.244        | 281.5         | 291.6         | 5.7             | 19.61           | 6   | Te   |
| Maekawa (2001) <sup>37</sup>                                 | Lw-H-V | 0.107    | 0.114              | 0.145        | 274.2         | 288.2         | 2.9             | 12.6            | 30  | Tr   |
| Maekawa (2008a) Pure Water Lw-H-V <sup>38</sup>              | Lw-H-V | 0.107    | 0.163              | 0.125        | 274.6         | 286.9         | 3               | 10.8            | 9   | Tr   |
| Marshall et al. 1964a <sup>39</sup>                          | Lw-H-V | 0.133    | 0.218              | 0.183        | 290.2         | 306.7         | 15.9            | 110.8           | 11  | Tr   |
| McLeod and Campbell (1961) <sup>40</sup>                     | Lw-H-V | 0.174    | 0.300              | 0.115        | 285.7         | 301.6         | 9.62            | 68.09           | 9   | Te   |
| Mohammadi et al. (2003) <sup>41</sup>                        | Lw-H-V | 0.243    | 0.175              | 0.251        | 278.85        | 278.85        | 4.72976         | 4.72976         | 1   | Te   |
| Mohammadi et al. (2005) <sup>42</sup>                        | Lw-H-V | 0.179    | 0.246              | 0.138        | 274.6         | 298.3         | 3.06            | 47.863          | 11  | Te   |
| Mu et al. (2018) <sup>43</sup>                               | Lw-H-V | 0.170    | 0.212              | 0.166        | 275.54        | 286.35        | 3.163           | 10.143          | 10  | Tr   |
| Nakamura et al. (2003) <sup>44</sup>                         | Lw-H-V | 0.012    | 0.066              | 0.054        | 274.25        | 285.78        | 2.92            | 9.54            | 17  | Te   |
| Nakano et al. (1999) <sup>45</sup>                           | Lw-H-V | 0.372    | 0.773              | 0.205        | 305.08        | 308.74        | 98              | 138             | 3   | Te   |
| Nixdorf and Oellrich (1997) <sup>46</sup>                    | Lw-H-V | 0.051    | 0.090              | 0.052        | 273.49        | 293.57        | 2.716           | 24.959          | 30  | Tr   |
| Ohgaki et al. (1996) <sup>47</sup>                           | Lw-H-V | 0.205    | 0.151              | 0.192        | 280.3         | 280.3         | 5.46            | 5.46            | 1   | Te   |
| Ohmura et al. (2002) <sup>48</sup>                           | Lw-H-V | 1.639    | 1.542              | 1.690        | 275           | 275           | 3.7             | 3.7             | 1   | Te   |
| Pahlavanzadeh et al. (2020) <sup>49</sup>                    | Lw-H-V | 0.126    | 0.146              | 0.117        | 275.3         | 279.26        | 3.2             | 4.74            | 5   | Tr   |
| Roberts et al. (1940) <sup>50</sup>                          | Lw-H-V | 0.200    | 0.184              | 0.123        | 280.9         | 286.7         | 5.847           | 10.8            | 3   | Te   |
| Saberi et al. (2018) <sup>51</sup>                           | Lw-H-V | 0.249    | 0.215              | 0.236        | 279           | 282.1         | 4.73            | 6.73            | 6   | Te   |
| Sabil et al. (2014) <sup>52</sup>                            | Lw-H-V | 0.671    | 0.662              | 0.590        | 280.15        | 288.65        | 5.55            | 15.29           | 9   | Te   |
| Sadeq et al. (2017) <sup>53</sup>                            | Lw-H-V | 0.464    | 0.489              | 0.383        | 279.45        | 292.95        | 5               | 25              | 6   | Te   |
| Sami et al. (2013) <sup>54</sup>                             | Lw-H-V | 0.405    | 0.363              | 0.368        | 279.9         | 283.56        | 5.25            | 7.98            | 4   | Te   |
| Servio and Englezos (2002) <sup>55</sup>                     | Lw-H-V | 0.106    | 0.291              | 0.072        | 276.25        | 282.05        | 3.5             | 6.5             | 3   | Te   |
| Smelik and King (1997) <sup>56</sup>                         | Lw-H-V | 0.325    | 0.416              | 0.222        | 273           | 284.5         | 2.482           | 8.356           | 6   | Te   |
| Sun et al. (2018) <sup>57</sup>                              | Lw-H-V | 0.071    | 0.070              | 0.042        | 280.9         | 289           | 5.7             | 14              | 9   | Tr   |
| Svartas and Fadnes (1992) <sup>58</sup>                      | Lw-H-V | 0.216    | 0.334              | 0.189        | 271.8         | 297.1         | 2.41            | 39.31           | 12  | Te   |
| Svartas and Fadnes (1992) 0.57 wt% MeOH Lw-H-V <sup>58</sup> | Lw-H-V | 0.055    | 0.197              | 0.109        | 299.2         | 299.2         | 49.96           | 49.96           | 1   | Te   |
| Thakore and Holder (1987) <sup>59</sup>                      | Lw-H-V | 0.484    | 0.435              | 0.469        | 274.35        | 281.2         | 2.87            | 6.1             | 7   | Te   |
| Verma (1974) <sup>60</sup>                                   | Lw-H-V | 0.176    | 0.219              | 0.190        | 275.2         | 291.2         | 3.02            | 18.55           | 7   | Te   |
| Ward et al. (2015) <sup>61</sup>                             | Lw-H-V | 0.067    | 0.075              | 0.042        | 276.29        | 285.57        | 3.53            | 9.38            | 8   | Tr   |
| Xiao et al. (2019) <sup>62</sup>                             | I-H-V  | 0.528    | 0.160              | 1.159        | 263.15        | 268.15        | 1.93            | 2.24            | 2   | Tr   |
|                                                              | Lw-H-V | 0.653    | 0.586              | 0.719        | 273.15        | 303.15        | 2.64            | 65.81           | 7   | Tr   |
| Xu et al. (2017) <sup>63</sup>                               | Lw-H-V | 0.094    | 0.122              | 0.119        | 285.65        | 291.65        | 9.5             | 20.1            | 4   | Te   |
| Yang et al. (2001) <sup>64</sup>                             | Lw-H-V | 0.185    | 0.180              | 0.200        | 276.5         | 286.3         | 3.68            | 9.66            | 10  | Tr   |
| Yasuda and Ohmura (2008) <sup>65</sup>                       | I-H-V  | 0.512    | 0.717              | 0.388        | 244.2         | 272.9         | 0.971           | 2.543           | 17  | Tr   |

| Reference       | Phases | AADT (K)     | CPAHYD-MF AADT (K) | B&S AADT (K) | $T_{min}$ (K) | $T_{max}$ (K) | $P_{min}$ (MPa) | $P_{max}$ (MPa) | $N$        | Type |
|-----------------|--------|--------------|--------------------|--------------|---------------|---------------|-----------------|-----------------|------------|------|
|                 | Lw-H-V | 0.190        | 0.355              | 0.074        | 272.9         | 274.7         | 2.53            | 3.016           | 13         | Tr   |
| <b>Training</b> | —      | <b>0.185</b> | <b>0.248</b>       | <b>0.175</b> | <b>244.2</b>  | <b>306.7</b>  | <b>0.971</b>    | <b>110.8</b>    | <b>256</b> | —    |
| <b>Test</b>     | —      | <b>0.298</b> | <b>0.335</b>       | <b>0.286</b> | <b>268.4</b>  | <b>309.85</b> | <b>2.324</b>    | <b>150.13</b>   | <b>276</b> | —    |
| <b>Overall</b>  | —      | <b>0.244</b> | <b>0.293</b>       | <b>0.233</b> | <b>244.2</b>  | <b>309.85</b> | <b>0.971</b>    | <b>150.13</b>   | <b>532</b> | —    |

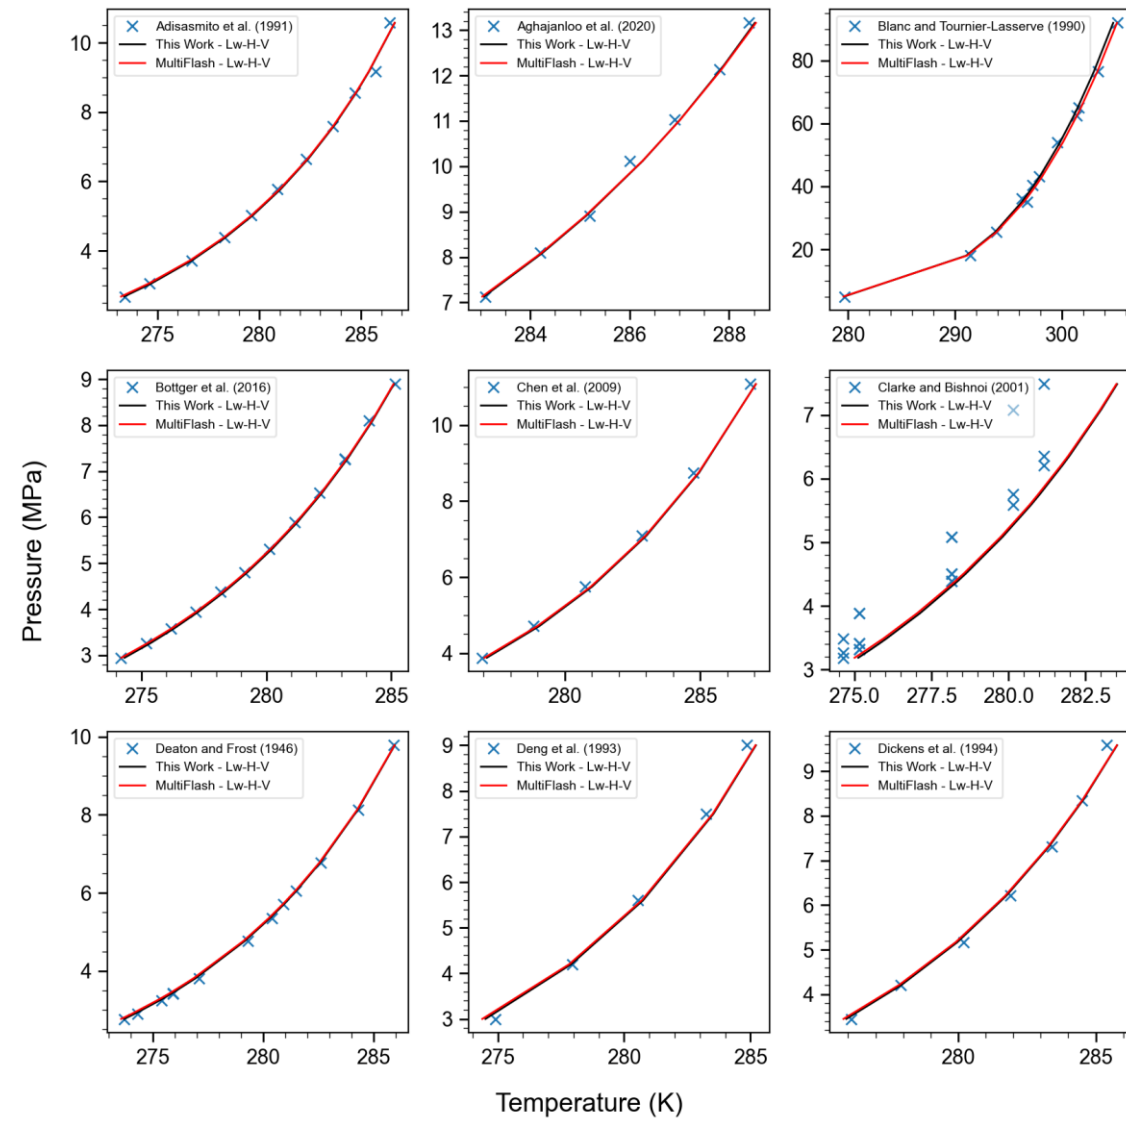

Figure S1: Selected hydrate equilibrium datasets (group 1) for simple  $\text{CH}_4$  hydrates, along with the predictions from two models: the CaSH model (black) and the MultiFlash 7.0 CPA-Hydrates (red). Datasets:<sup>8-13,16-18</sup>

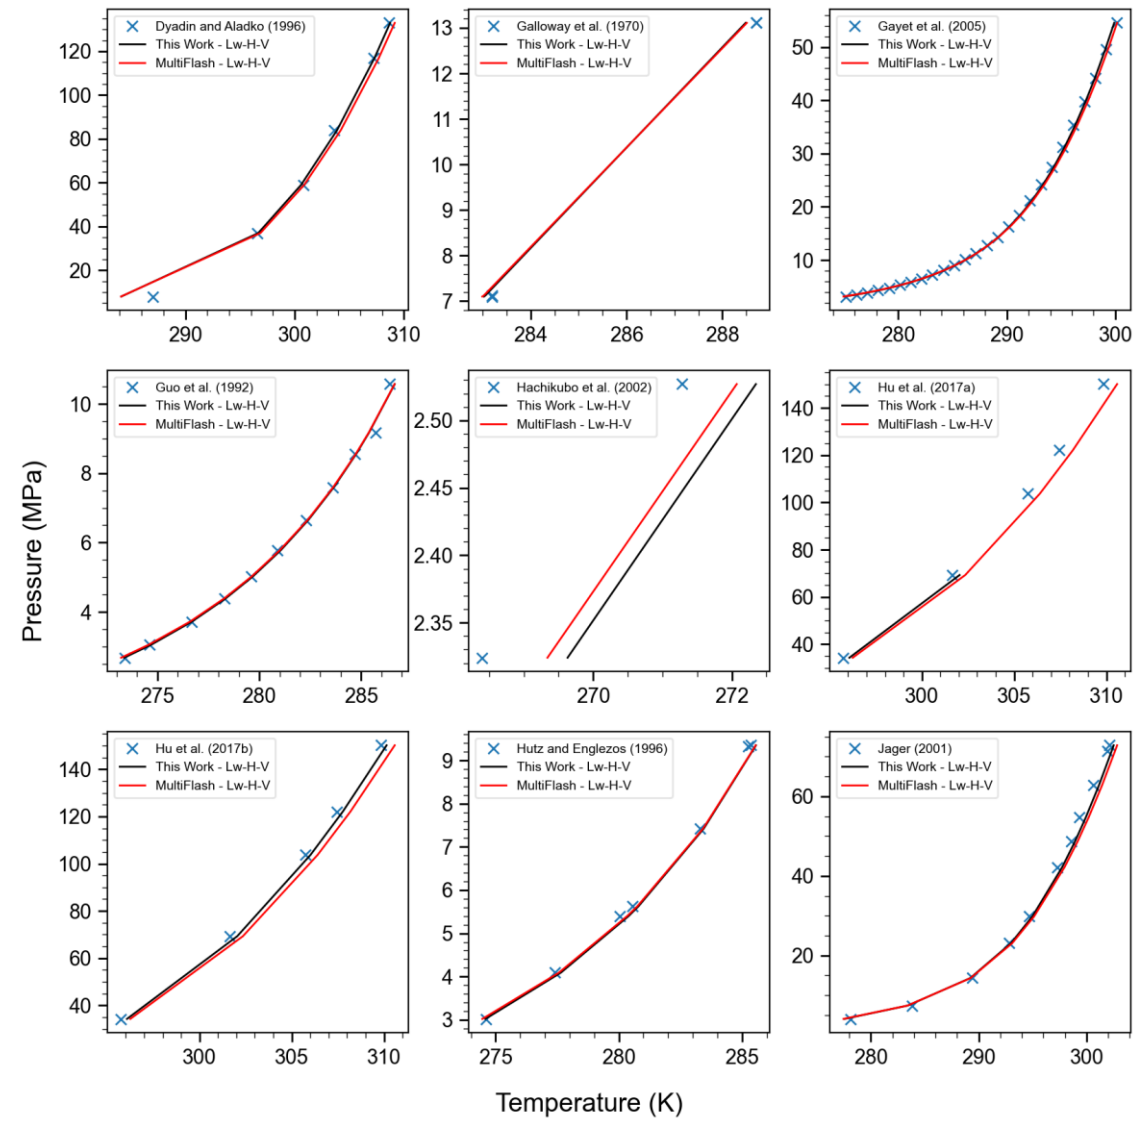

Figure S2: Selected hydrate equilibrium datasets (group 2) for simple  $\text{CH}_4$  hydrates, along with the predictions from two models: the CaSH model (black) and the MultiFlash 7.0 CPA-Hydrates (red). Datasets:<sup>19-27</sup>

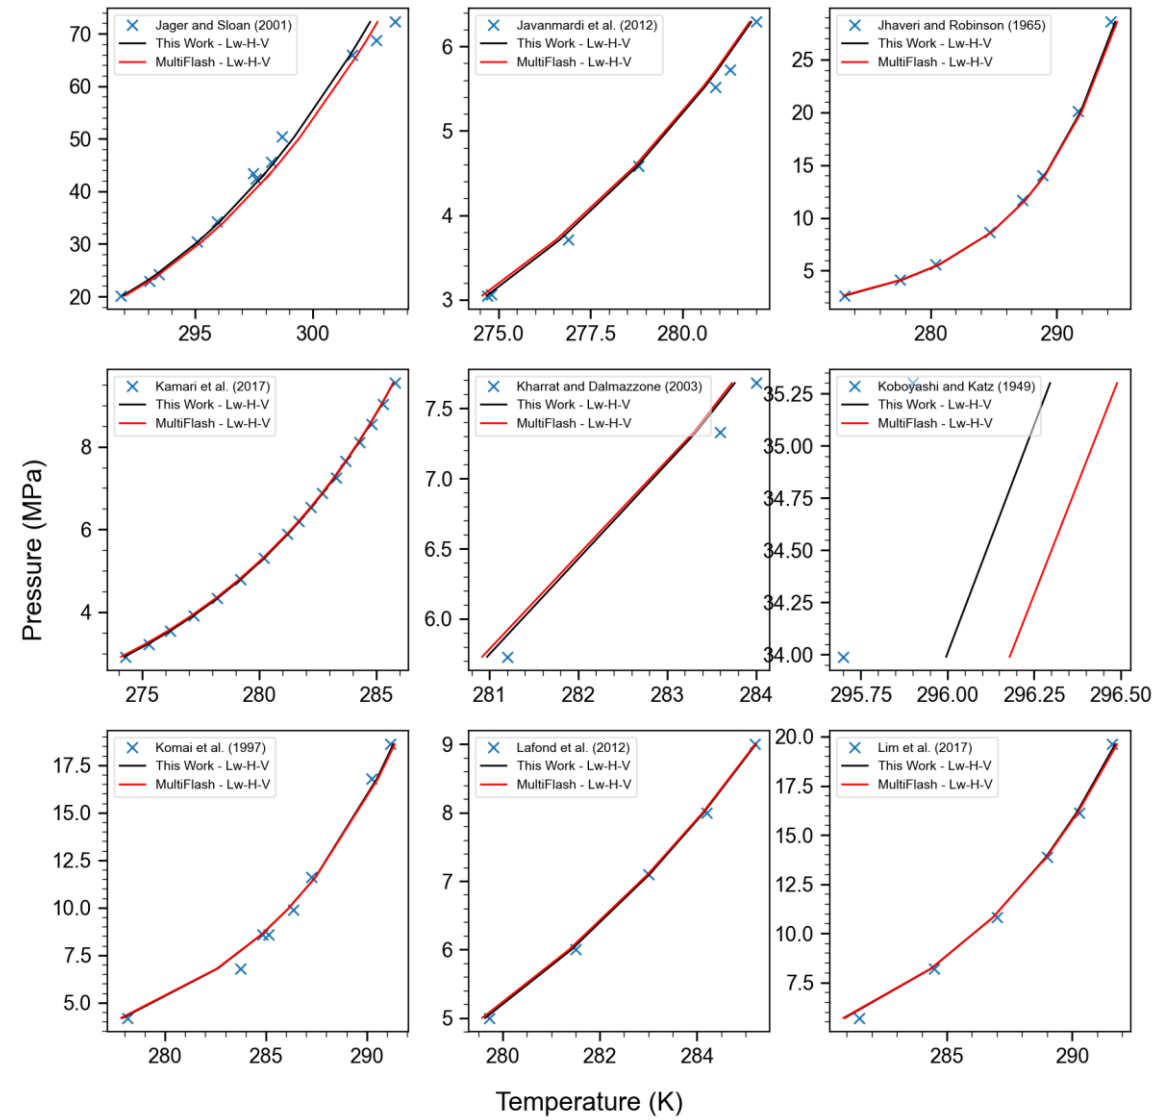

Figure S3: Selected hydrate equilibrium datasets (group 3) for simple  $\text{CH}_4$  hydrates, along with the predictions from two models: the CaSH model (black) and the MultiFlash 7.0 CPA-Hydrates (red). Datasets:<sup>28-36</sup>

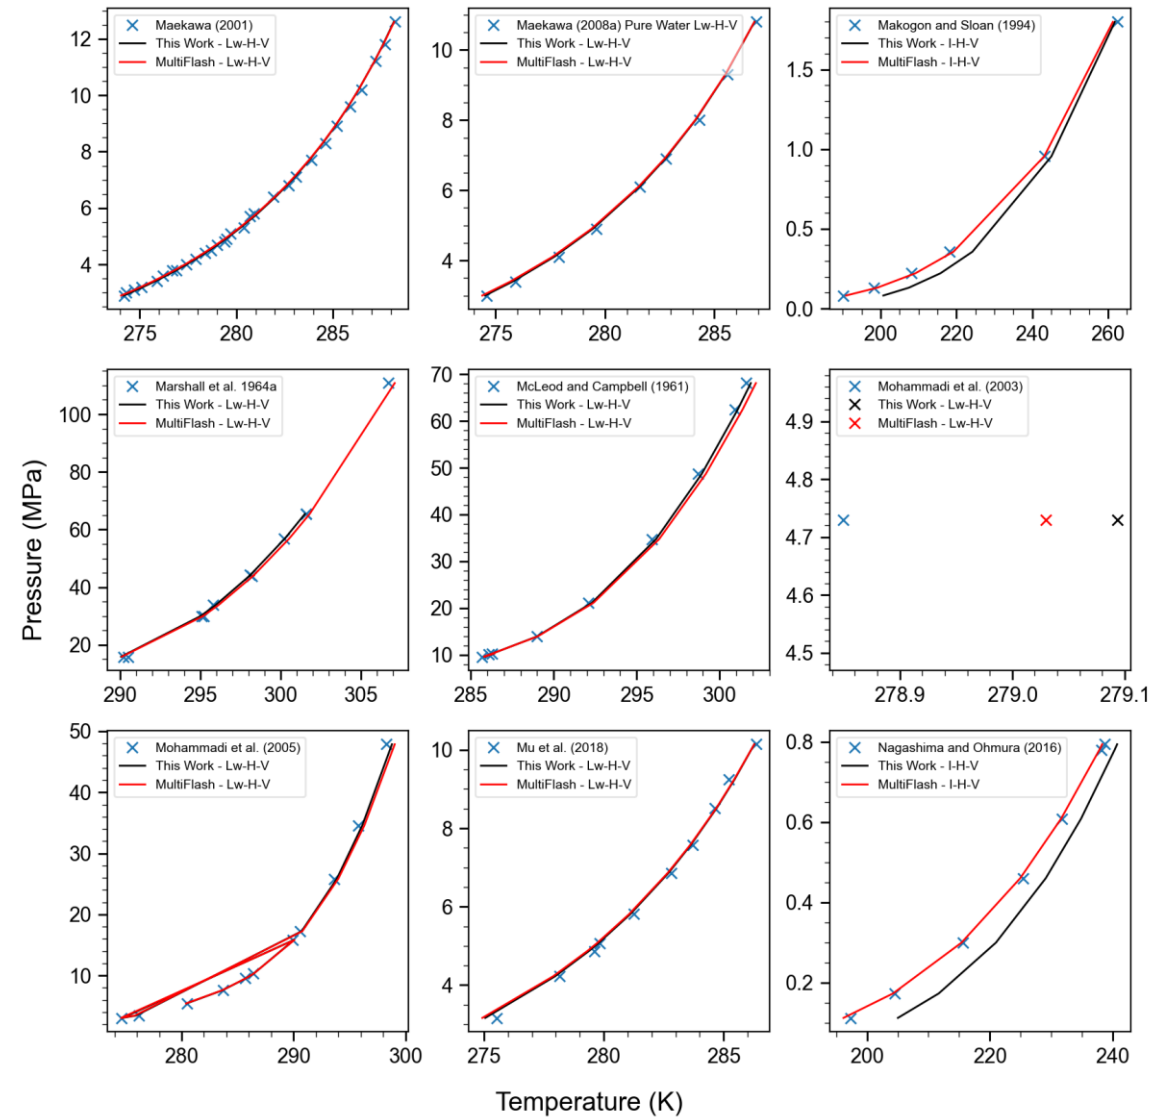

Figure S4: Selected hydrate equilibrium datasets (group 4) for simple CH<sub>4</sub> hydrates, along with the predictions from two models: the CaSH model (black) and the MultiFlash 7.0 CPA-Hydrates (red). Datasets:<sup>37-43,66,67</sup>

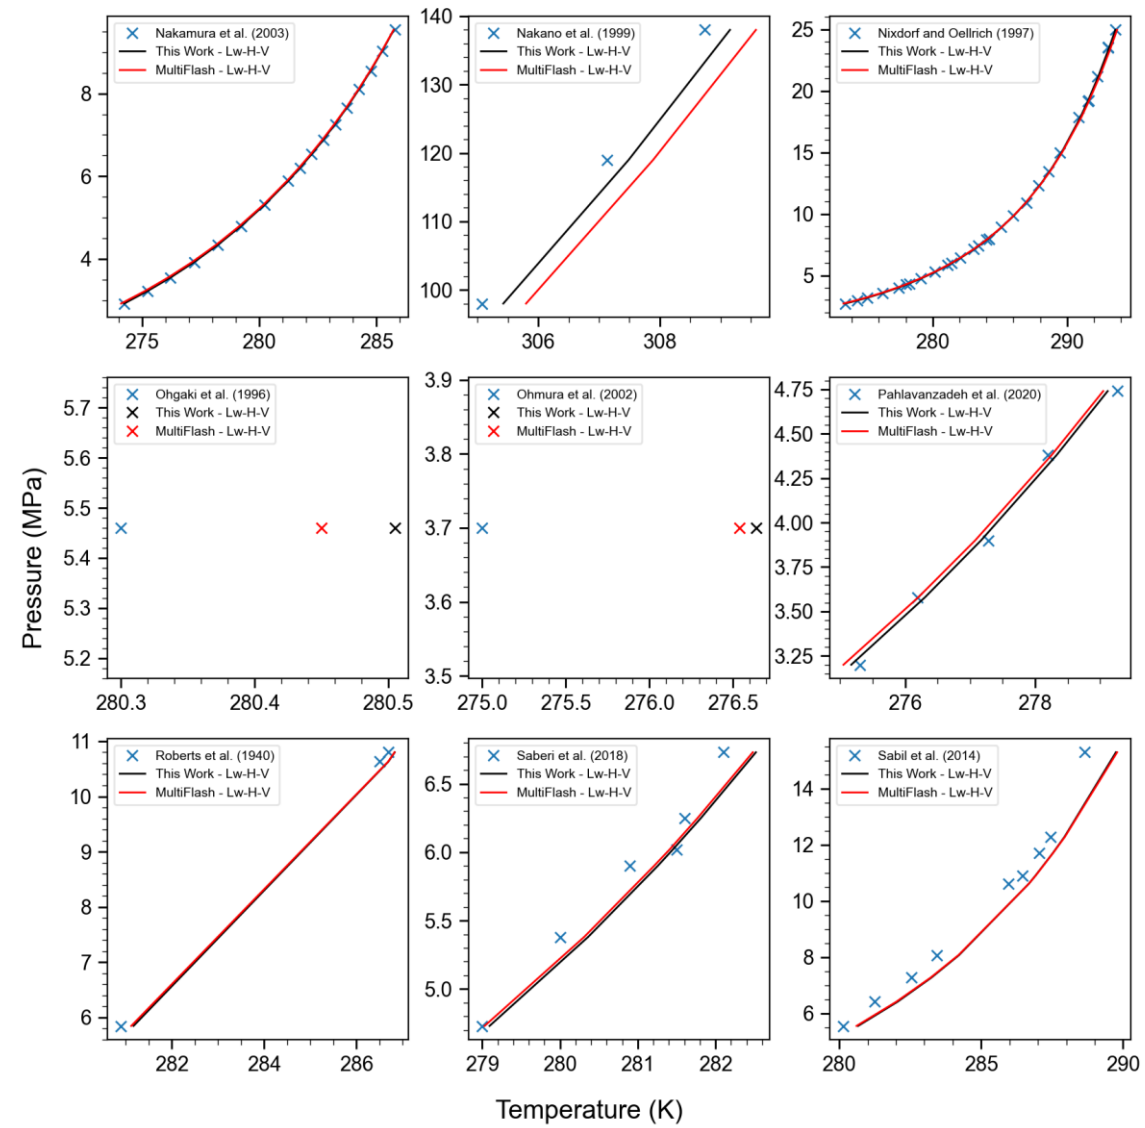

Figure S5: Selected hydrate equilibrium datasets (group 5) for simple CH<sub>4</sub> hydrates, along with the predictions from two models: the CaSH model (black) and the MultiFlash 7.0 CPA-Hydrates (red). Datasets:<sup>44-52</sup>



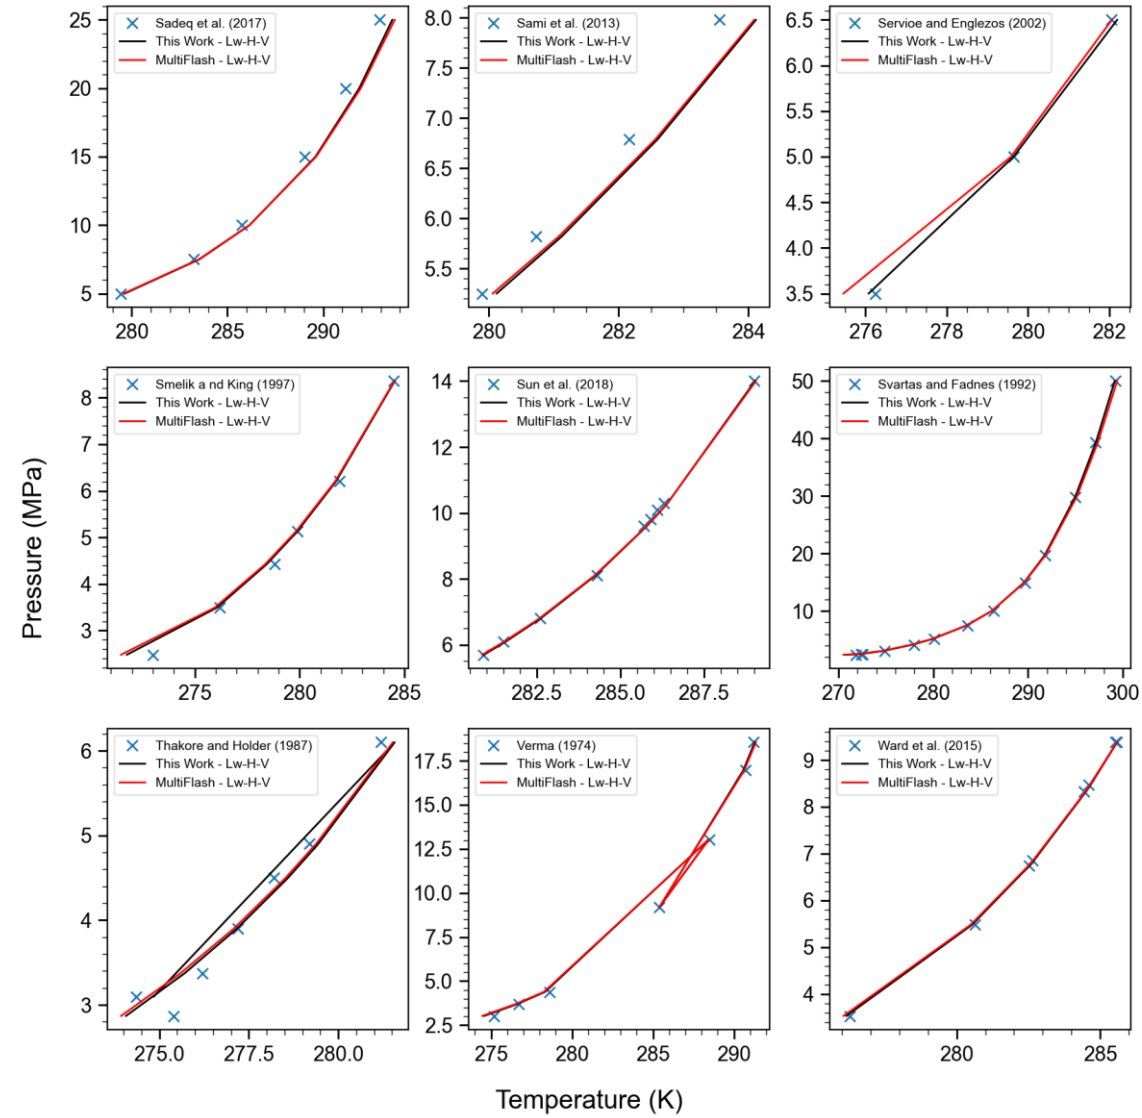

Figure S6: Selected hydrate equilibrium datasets (group 6) for simple  $\text{CH}_4$  hydrates, along with the predictions from two models: the CaSH model (black) and the MultiFlash 7.0 CPA-Hydrates (red). Datasets:<sup>53-61</sup>

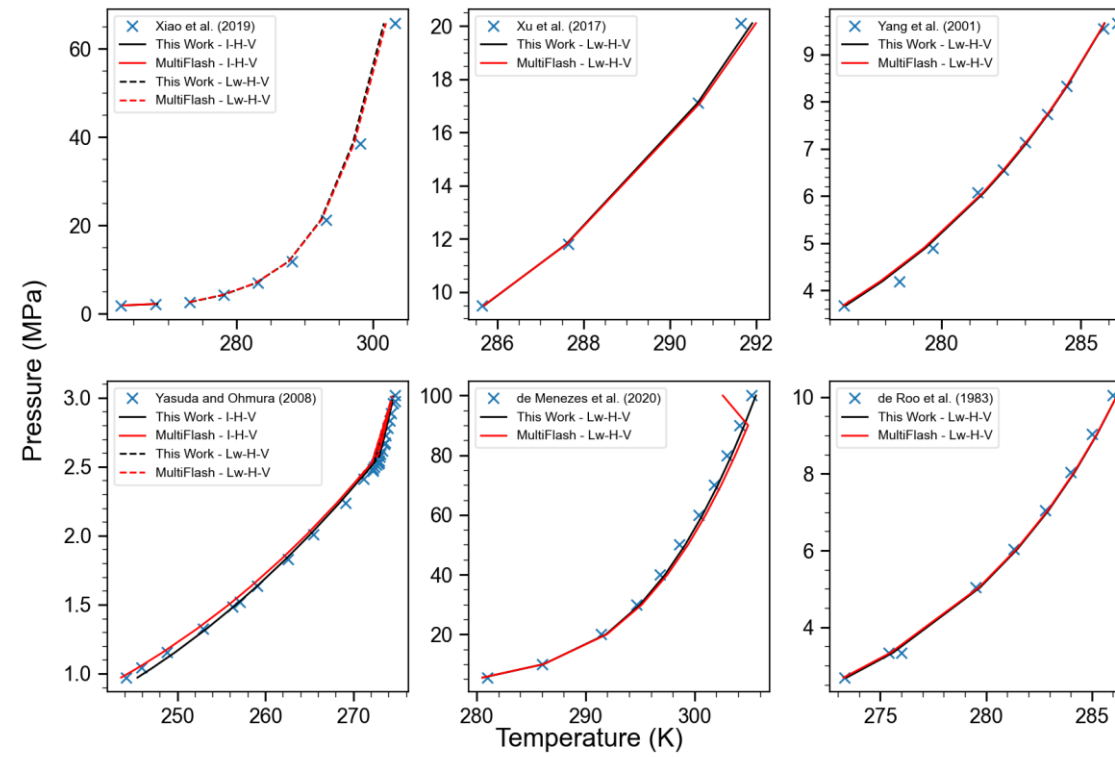

Figure S7: Selected hydrate equilibrium datasets (group 7) for simple CH<sub>4</sub> hydrates, along with the predictions from two models: the CaSH model (black) and the MultiFlash 7.0 CPA-Hydrates (red). Datasets:<sup>14,15,62–65</sup>

### 3.1.2. C<sub>2</sub>H<sub>6</sub> simple hydrate equilibria

Table S10: Database of C<sub>2</sub>H<sub>6</sub> simple hydrate equilibrium data, with comparison of the AADT of the cavity-based model against CPAHYD-MF and B&S. Data types: "Tr" = Training Data; "Te" = Test Data.

| Reference                                 | Phases     | AA DT (K) | CPAHYD-MF AADT (K) | B&S AADT (K) | T <sub>min</sub> (K) | T <sub>max</sub> (K) | P <sub>min</sub> (MPa) | P <sub>max</sub> (MPa) | N  | Type |
|-------------------------------------------|------------|-----------|--------------------|--------------|----------------------|----------------------|------------------------|------------------------|----|------|
| Avlonitis (1988) <sup>68</sup>            | Lw-H-V     | 0.101     | 0.505              | 0.155        | 277.8                | 287.2                | 0.848                  | 3.082                  | 10 | Tr   |
| Clarke and Bishnoi (2001) <sup>13</sup>   | Lw-H-V     | 0.884     | 0.457              | 0.736        | 274.15               | 280.65               | 0.487                  | 1.087                  | 7  | Te   |
| de Menezes et al. (2020) <sup>14</sup>    | Lw-H-V     | 0.380     | 0.978              | 0.379        | 286.16               | 298.09               | 3                      | 90                     | 12 | Tr   |
| Deaton and Frost (1946) <sup>16</sup>     | Lw-H-V     | 0.078     | 0.358              | 0.061        | 273.7                | 286.5                | 0.503                  | 2.73                   | 20 | Tr   |
|                                           | I-H-V      | 0.108     | 1.016              | 0.476        | 263.6                | 272                  | 0.313                  | 0.457                  | 4  | Tr   |
| Englezos and Bishnoi (1991) <sup>69</sup> | Lw-H-V     | 0.057     | 0.376              | 0.051        | 274.3                | 282.98               | 0.548                  | 1.637                  | 6  | Te   |
| Falabella and Vanpee (1974) <sup>70</sup> | I-H-V      | 2.757     | 0.537              | 0.308        | 200.8                | 240.8                | 0.0083                 | 0.1013                 | 5  | Te   |
| Galloway et al. (1970) <sup>20</sup>      | Lw-H-V     | 0.144     | 0.300              | 0.013        | 277.6                | 292.5                | 0.814                  | 1.551                  | 3  | Te   |
| Hashimoto et al. (2008) <sup>71</sup>     | Lw-H-V     | 0.192     | 0.370              | 0.270        | 279.1                | 288.1                | 1.01                   | 3.32                   | 3  | Tr   |
| Holder and Grigoriou (1980) <sup>72</sup> | Lw-H-V     | 0.304     | 0.238              | 0.262        | 277.5                | 286.5                | 0.78                   | 2.62                   | 7  | Te   |
| Holder and Hand (1982) <sup>73</sup>      | Lw-H-V     | 0.186     | 0.281              | 0.204        | 278.8                | 288.2                | 0.95                   | 3.36                   | 8  | Te   |
|                                           | Lw-H-V-LHC | 0.603     | 0.266              | 0.687        | 288.3                | 288.3                | 3.33                   | 3.33                   | 2  | Te   |
| Long et al. (2010) <sup>74</sup>          | Lw-H-V     | 0.187     | 0.230              | 0.144        | 280.1                | 285.6                | 1.11                   | 2.32                   | 5  | Tr   |
| Maekawa (2012) <sup>75</sup>              | Lw-H-V     | 0.049     | 0.368              | 0.047        | 276.6                | 287.5                | 0.73                   | 3.22                   | 9  | Tr   |
| Matsui et al. (2010) <sup>76</sup>        | Lw-H-V     | 0.096     | 0.325              | 0.033        | 274.15               | 284.15               | 0.53                   | 1.913                  | 3  | Tr   |
| Mohammadi and Richon (2010) <sup>77</sup> | I-H-V      | 0.315     | 0.750              | 0.414        | 262.5                | 272.2                | 0.29                   | 0.462                  | 4  | Tr   |
| Mohammadi et al. (2008a) <sup>78</sup>    | Lw-H-V     | 0.323     | 0.112              | 0.214        | 275.2                | 282.1                | 0.6                    | 1.4                    | 3  | Tr   |
| Morita et al. (2000) <sup>79</sup>        | Lw-H-LHC   | 0.238     | 0.793              | 0.360        | 298.01               | 299.15               | 89                     | 99                     | 2  | Te   |
| Nakano et al. (1998a) <sup>80</sup>       | Lw-H-LHC   | 0.205     | 0.549              | 0.347        | 290.42               | 298.36               | 19.48                  | 83.75                  | 26 | Tr   |
| Ng and Robinson (1985) <sup>81</sup>      | Lw-H-LHC   | 0.135     | 0.359              | 0.149        | 288                  | 290.6                | 3.33                   | 20.34                  | 8  | Te   |
| Ng et al. (1983) <sup>82</sup>            | Lw-H-V     | 0.115     | 0.374              | 0.148        | 288                  | 290.63               | 3.33                   | 20.34                  | 8  | Te   |
| Nixdorf and Oellrich (1997) <sup>46</sup> | Lw-H-V     | 0.141     | 0.271              | 0.075        | 273.68               | 287.61               | 0.499                  | 3.244                  | 15 | Tr   |
| Reamer et al. (1952) <sup>83</sup>        | Lw-H-V     | 0.432     | 0.598              | 0.380        | 279.9                | 287.4                | 0.972                  | 3.298                  | 4  | Te   |
| Roberts et al. (1940) <sup>50</sup>       | Lw-H-LHC   | 0.206     | 0.420              | 0.217        | 287.7                | 288.4                | 3.413                  | 6.84                   | 9  | Te   |
|                                           | Lw-H-V     | 0.349     | 0.758              | 0.401        | 273.4                | 287                  | 0.545                  | 3.054                  | 11 | Te   |
|                                           | I-H-V      | 1.379     | 2.372              | 1.856        | 260.8                | 269.3                | 0.29                   | 0.441                  | 3  | Te   |
| Yasuda and Ohmura (2008) <sup>65</sup>    | I-Lw-H-V*  | 0.438     | 0.343              | 0.061        | 267.2                | 275.9                | 0.359                  | 0.658                  | 21 | Tr   |
|                                           | Lw-H-V     | 0.245     | 0.074              | 0.084        | 273.9                | 275.7                | 0.508                  | 0.637                  | 2  | Tr   |

| Reference       | Phases   | ADT (K)      | CPAHYD-MF ADT (K) | B&S ADT (K)  | $T_{min}$ (K) | $T_{max}$ (K) | $P_{min}$ (MPa) | $P_{max}$ (MPa) | $N$        | Type |
|-----------------|----------|--------------|-------------------|--------------|---------------|---------------|-----------------|-----------------|------------|------|
|                 | I-Lw-H-V | 0.702        | 0.182             | 0.129        | 273.1         | 273.1         | 0.463           | 0.463           | 1          | Tr   |
|                 | I-H-V    | 0.517        | 0.402             | 0.388        | 244.9         | 271.9         | 0.122           | 0.443           | 10         | Tr   |
| <b>Training</b> | —        | <b>0.237</b> | <b>0.458</b>      | <b>0.197</b> | <b>244.9</b>  | <b>298.36</b> | <b>0.122</b>    | <b>90</b>       | <b>148</b> | —    |
| <b>Test</b>     | —        | <b>0.477</b> | <b>0.513</b>      | <b>0.342</b> | <b>200.8</b>  | <b>299.15</b> | <b>0.0083</b>   | <b>99</b>       | <b>83</b>  | —    |
| <b>Overall</b>  | —        | <b>0.366</b> | <b>0.518</b>      | <b>0.292</b> | <b>200.8</b>  | <b>299.15</b> | <b>0.0083</b>   | <b>99</b>       | <b>231</b> | —    |

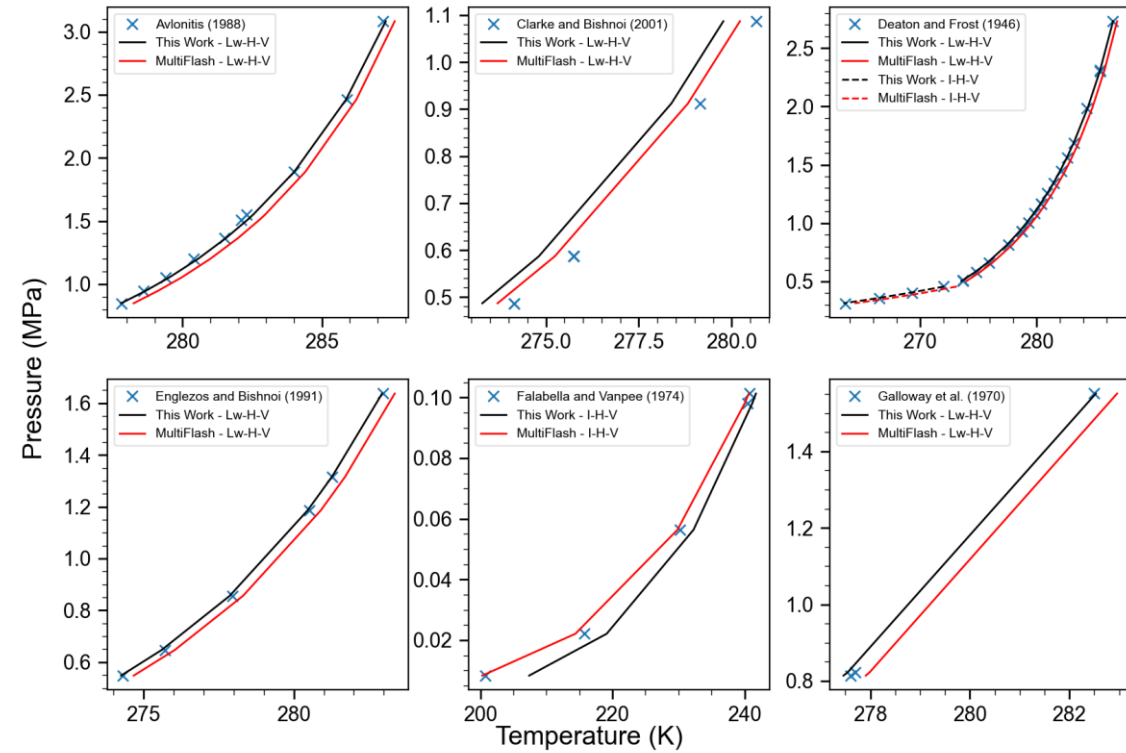

Figure S8: Selected hydrate equilibrium datasets (group 1) for simple ethane hydrates, along with the predictions from two models: the CaSH model (black) and the MultiFlash 7.0 CPA-Hydrates (red). Datasets: <sup>13,16,20,68-70</sup>

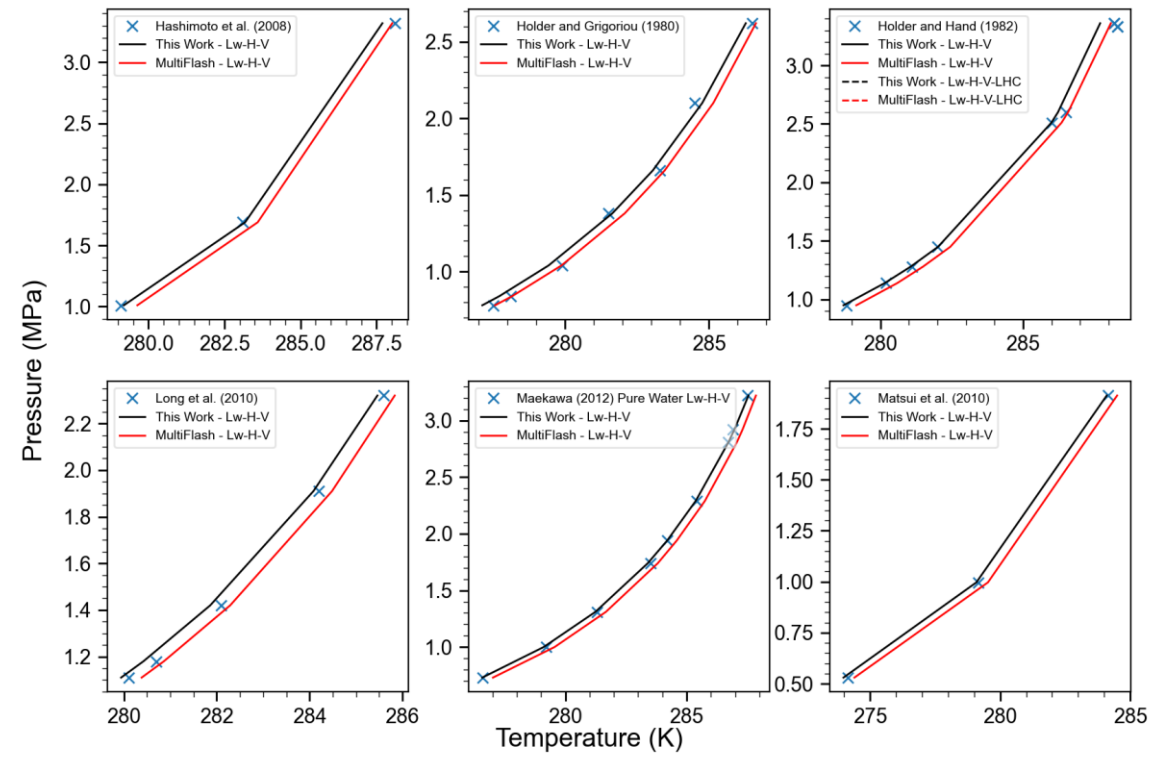

Figure S9: Selected hydrate equilibrium datasets (group 2) for simple ethane hydrates, along with the predictions from two models: the CaSH model (black) and the MultiFlash 7.0 CPA-Hydrates (red). Datasets:<sup>71–76</sup>

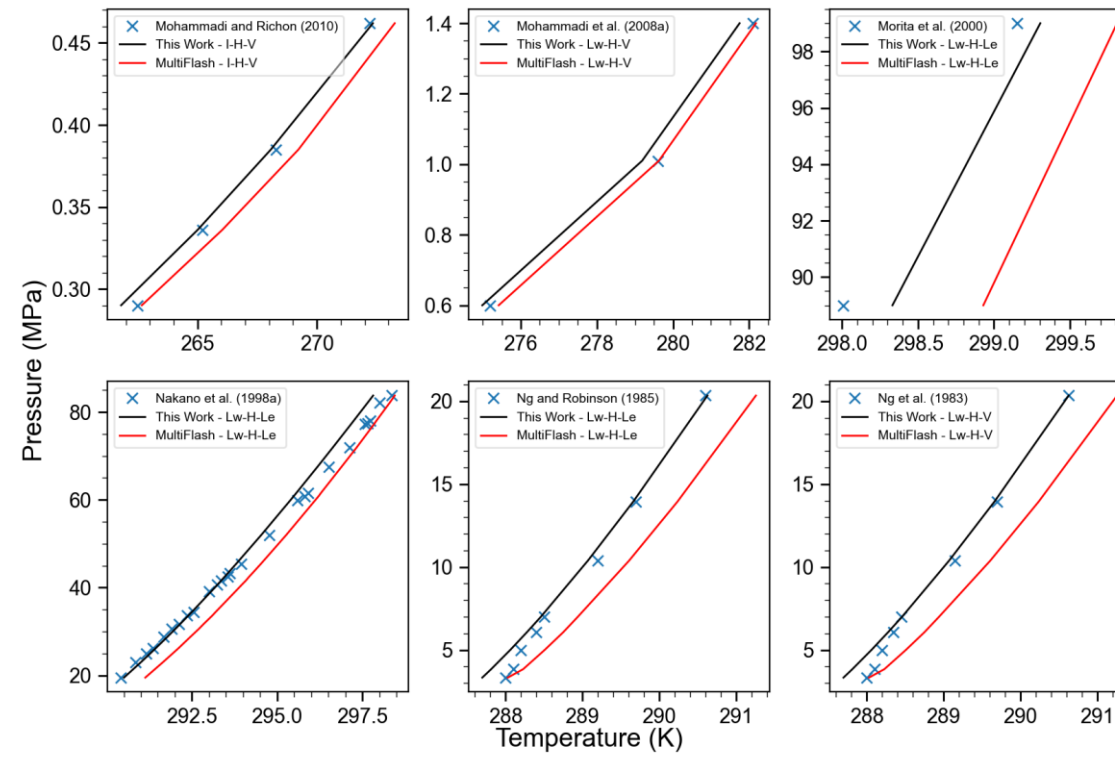

Figure S10: Selected hydrate equilibrium datasets (group 3) for simple ethane hydrates, along with the predictions from two models: the CaSH model (black) and the MultiFlash 7.0 CPA-Hydrates (red). Datasets:<sup>77–82</sup>

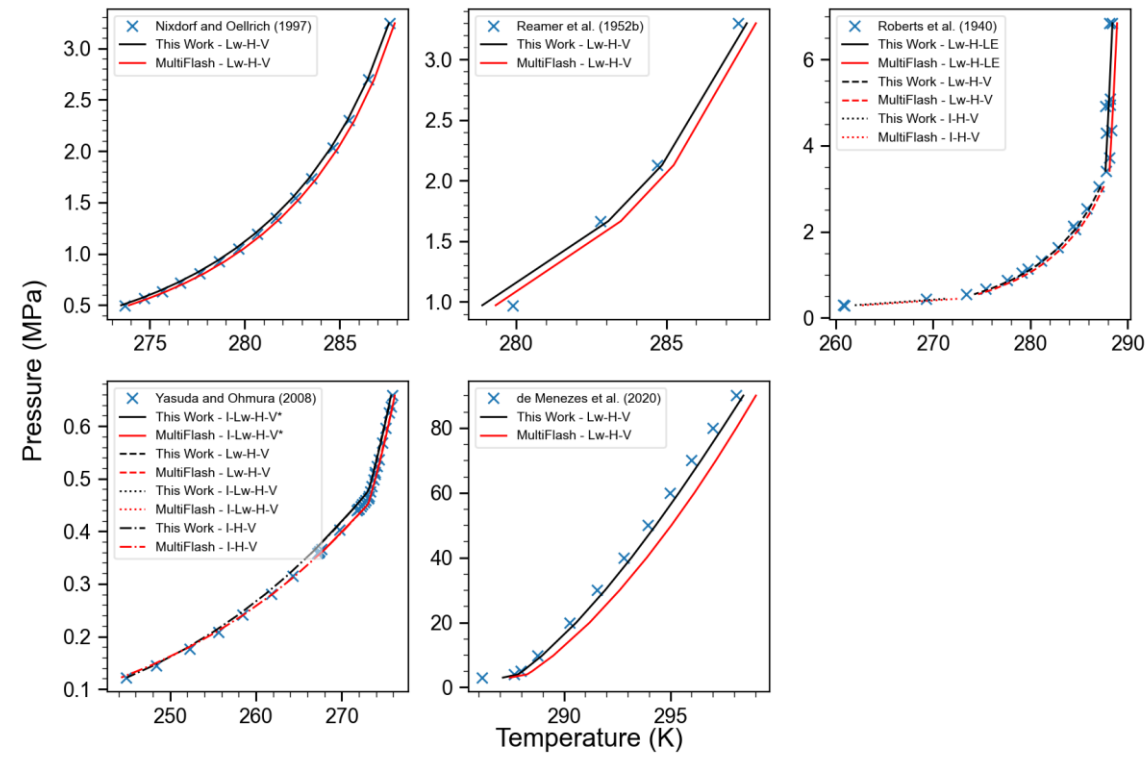

Figure S11: Selected hydrate equilibrium datasets (group 4) for simple ethane hydrates, along with the predictions from two models: the CaSH model (black) and the MultiFlash 7.0 CPA-Hydrates (red). Datasets: <sup>14,46,50,65,83</sup>

### 3.1.3. CO<sub>2</sub> simple hydrate equilibria

Table S11: Database of simple CO<sub>2</sub> hydrate equilibrium data, with comparison of the AADT of the cavity-based model against CPAHYD-MF and B&S. Data types: "Tr" = Training Data; "Te" = Test Data.

| Reference                                   | Phases     | AADT (K) | CPAHYD-MF AADT (K) | B&S AADT (K) | T <sub>min</sub> (K) | T <sub>max</sub> (K) | P <sub>min</sub> (MPa) | P <sub>max</sub> (MPa) | N  | Type |
|---------------------------------------------|------------|----------|--------------------|--------------|----------------------|----------------------|------------------------|------------------------|----|------|
| Adisasmito et al. (1991) <sup>8</sup>       | Lw-H-V     | 0.159    | 0.173              | 0.102        | 274.3                | 282.9                | 1.42                   | 4.37                   | 9  | Tr   |
| Chen et al. (2009) <sup>12</sup>            | Lw-H-V     | 0.181    | 0.222              | 0.045        | 275.25               | 279.85               | 1.59                   | 2.86                   | 4  | Te   |
| Chima-Maceda et al. (2019) <sup>84</sup>    | Lw-H-V     | 0.108    | 0.090              | 0.255        | 276.22               | 282.54               | 1.74                   | 4.09                   | 5  | Tr   |
| Dai et al. (2020) <sup>85</sup>             | Lw-H-V     | 0.117    | 0.093              | 0.334        | 275.65               | 283.25               | 1.616                  | 4.452                  | 11 | Tr   |
| de Menezes et al. (2020) <sup>14</sup>      | Lw-H-V     | 0.081    | 0.694              | 0.199        | 283.7                | 288.45               | 9.8                    | 80                     | 8  | Tr   |
| Deaton and Frost (1946) <sup>16</sup>       | Lw-H-V     | 0.145    | 0.158              | 0.137        | 273.7                | 282.9                | 1.324                  | 4.323                  | 19 | Te   |
| Dholabhai et al. (1993) <sup>86</sup>       | Lw-H-V     | 0.112    | 0.154              | 0.032        | 273.8                | 279                  | 1.34                   | 2.52                   | 4  | Te   |
| Fan and Guo (1999) <sup>87</sup>            | LHC-H-Lw   | 0.713    | 0.791              | 0.400        | 283.1                | 283.6                | 9.32                   | 12.87                  | 3  | Te   |
| Fan and Guo (1999) <sup>87</sup>            | Lw-H-V     | 0.194    | 0.196              | 0.142        | 273.6                | 282                  | 1.31                   | 4.02                   | 9  | Te   |
| Fan et al. (2000) <sup>88</sup>             | Lw-H-LHC   | 0.286    | 0.269              | 0.124        | 283.33               | 283.36               | 5.97                   | 7.35                   | 2  | Te   |
| Fan et al. (2000) <sup>88</sup>             | Lw-H-V-LHC | 0.090    | 0.011              | 0.385        | 283.27               | 283.27               | 4.48                   | 4.48                   | 1  | Te   |
| Fan et al. (2000) <sup>88</sup>             | Lw-H-V     | 0.184    | 0.174              | 0.363        | 274.7                | 282.5                | 1.5                    | 4.01                   | 13 | Te   |
| Ferrari et al. (2016) <sup>89</sup>         | Lw-H-V     | 0.023    | 0.046              | 0.242        | 275.65               | 281.65               | 1.65                   | 3.5                    | 5  | Te   |
| Hachikubo et al. (2002) <sup>23</sup>       | Lw-H-V     | 0.176    | 0.181              | 0.198        | 273.93               | 278.05               | 1.349                  | 2.204                  | 4  | Te   |
| Hachikubo et al. (2002) <sup>23</sup>       | I-H-V      | 0.778    | 0.224              | 0.214        | 263.17               | 271.23               | 0.774                  | 1.029                  | 3  | Te   |
| Ilani-Kashkouli et al. (2016) <sup>90</sup> | Lw-H-V     | 0.075    | 0.091              | 0.294        | 279.3                | 283.3                | 2.57                   | 4.45                   | 4  | Tr   |
| Jarrhian and Nakhaee (2019) <sup>91</sup>   | Lw-H-V     | 0.059    | 0.089              | 0.125        | 274.15               | 280.15               | 1.39                   | 2.91                   | 7  | Te   |
| Kamari et al. (2017) <sup>31</sup>          | Lw-H-V     | 0.211    | 0.229              | 0.123        | 277.2                | 281.9                | 2.04                   | 3.69                   | 4  | Tr   |
| Khan et al. (2017) <sup>92</sup>            | Lw-H-V     | 0.392    | 0.388              | 0.687        | 277.4                | 283                  | 1.85                   | 3.95                   | 5  | Tr   |
| Komai et al. (1997) <sup>34</sup>           | Lw-H-V     | 0.722    | 0.709              | 1.009        | 278.15               | 283.05               | 1.9                    | 4.1                    | 3  | Te   |
| Larson (1955) <sup>93</sup>                 | Lw-H-V     | 0.225    | 0.157              | 0.240        | 271.8                | 283.2                | 1.048                  | 4.502                  | 36 | Te   |
| Lee et al. (2012) <sup>94</sup>             | Lw-H-V     | 0.239    | 0.281              | 0.126        | 274                  | 278                  | 1.41                   | 2.23                   | 2  | Tr   |
| Maekawa (2010) <sup>95</sup>                | Lw-H-V     | 0.173    | 0.184              | 0.136        | 273.6                | 283.1                | 1.33                   | 4.54                   | 13 | Tr   |
| Mannar et al. (2017) <sup>96</sup>          | Lw-H-V     | 0.205    | 0.208              | 0.473        | 276.65               | 282.7                | 1.87                   | 3.78                   | 5  | Tr   |
| Matsui et al. (2010) <sup>76</sup>          | Lw-H-V     | 0.065    | 0.080              | 0.109        | 274.15               | 279.15               | 1.385                  | 2.543                  | 2  | Tr   |
| Melnikov et al. (2011) <sup>97</sup>        | Lw-H-V     | 0.170    | 0.153              | 0.249        | 273.3                | 280.2                | 1.25                   | 2.95                   | 6  | Tr   |
| Mohammadi (2018) <sup>98</sup>              | Lw-H-V     | 0.101    | 0.077              | 0.298        | 277.8                | 281.9                | 2.1                    | 3.67                   | 6  | Tr   |
| Mohammadi and Richon (2011) <sup>99</sup>   | I-H-V      | 0.860    | 0.433              | 0.160        | 260.2                | 270.7                | 0.682                  | 1.003                  | 5  | Tr   |



| Reference                                    | Phases     | AADT (K)     | CPAHYD-MF AADT (K) | B&S AADT (K) | $T_{min}$ (K) | $T_{max}$ (K) | $P_{min}$ (MPa) | $P_{max}$ (MPa) | $N$        | Type |
|----------------------------------------------|------------|--------------|--------------------|--------------|---------------|---------------|-----------------|-----------------|------------|------|
| Mohammadi et al. (2005) <sup>42</sup>        | Lw-H-V     | 0.109        | 0.091              | 0.242        | 277.5         | 282.5         | 2.048           | 4.02            | 6          | Tr   |
| Nema et al. (2017) <sup>100</sup>            | Lw-H-V     | 0.194        | 0.111              | 0.059        | 271.65        | 275.75        | 1.056           | 1.708           | 7          | Tr   |
| Ng and Robinson (1983) <sup>82</sup>         | Lw-H-LCO2  | 0.575        | 0.605              | 0.213        | 282.92        | 283.93        | 5.03            | 14.36           | 6          | Tr   |
| Ng and Robinson (1983) <sup>82</sup>         | Lw-H-V     | 0.402        | 0.375              | 0.068        | 279.59        | 282.79        | 2.74            | 4.36            | 3          | Tr   |
| Ohgaki et al. (1993) <sup>101</sup>          | H-Lw-LHC   | 1.337        | 1.312              | 1.032        | 281.14        | 283.59        | 4.386           | 8.93            | 8          | Te   |
| Ohgaki et al. (1993) <sup>101</sup>          | Lw-LHC-V   | 2.191        | 2.231              | 2.552        | 283.07        | 289.37        | 4.485           | 5.216           | 10         | Te   |
| Ohgaki et al. (1993) <sup>101</sup>          | Lw-H-V     | 0.630        | 0.653              | 0.444        | 273.36        | 281.79        | 1.338           | 4.085           | 32         | Te   |
| Ohgaki et al. (1996) <sup>47</sup>           | Lw-H-V     | 0.354        | 0.371              | 0.030        | 280.3         | 280.3         | 3.04            | 3.04            | 1          | Te   |
| Robinson and Mehta (1971) <sup>102</sup>     | Lw-H-V-LHC | 0.044        | 0.034              | 0.430        | 283.3         | 283.3         | 4.468           | 4.468           | 1          | Te   |
| Robinson and Mehta (1971) <sup>102</sup>     | Lw-H-V     | 0.149        | 0.147              | 0.136        | 273.9         | 282           | 1.379           | 3.84            | 6          | Te   |
| Ruffine and Trusler (2010) <sup>103</sup>    | Lw-H-V     | 0.205        | 0.210              | 0.337        | 275.03        | 282.76        | 1.502           | 4.079           | 10         | Tr   |
| Ruffine and Trusler (2010) <sup>103</sup>    | Lw-H-LHC   | 0.303        | 0.391              | 0.298        | 283.25        | 286.76        | 5.993           | 46.575          | 3          | Tr   |
| Ruffine and Trusler (2010) <sup>103</sup>    | Lw-H-V-LHC | 0.441        | 0.366              | 0.030        | 282.85        | 282.85        | 4.43            | 4.43            | 1          | Tr   |
| Sabil et al. (2010) <sup>104</sup>           | Lw-H-V     | 0.189        | 0.156              | 0.425        | 275.12        | 282.9         | 1.51            | 4.3             | 10         | Tr   |
| Sabil et al. (2014) <sup>52</sup>            | Lw-H-V     | 0.166        | 0.153              | 0.276        | 272.65        | 281.45        | 1.1             | 3.38            | 11         | Tr   |
| Sami et al. (2013) <sup>54</sup>             | Lw-H-V     | 0.209        | 0.206              | 0.265        | 276.7         | 281.57        | 1.82            | 3.76            | 5          | Te   |
| Seif et al. (2018) <sup>105</sup>            | Lw-H-V     | 0.532        | 0.497              | 0.296        | 280.3         | 283.1         | 3.21            | 4.54            | 2          | Te   |
| Seo et al. (2000) <sup>106</sup>             | Lw-H-V     | 0.177        | 0.206              | 0.051        | 274.76        | 281.46        | 1.5             | 3.5             | 4          | Tr   |
| Servio et al. (2001) <sup>107</sup>          | Lw-H-V     | 1.613        | 2.933              | 3.039        | 277.05        | 283.15        | 2               | 4.2             | 9          | Te   |
| Sun et al. (2016) <sup>108</sup>             | Lw-H-V     | 0.119        | 0.166              | 0.082        | 276.15        | 278.15        | 1.747           | 2.296           | 9          | Tr   |
| Takenouchi and Kennedy (1965) <sup>109</sup> | Lw-H-LHC   | 0.175        | 0.399              | 0.126        | 283.2         | 289.2         | 4.5             | 88.1            | 9          | Te   |
| Unruh and Katz (1949) <sup>110</sup>         | Lw-H-V-LHC | 0.291        | 0.214              | 0.187        | 283.1         | 283.1         | 4.502           | 4.502           | 1          | Te   |
| Unruh and Katz (1949) <sup>110</sup>         | Lw-H-V     | 0.206        | 0.225              | 0.129        | 277.2         | 281.9         | 2.041           | 3.689           | 4          | Te   |
| Vlahakis et al. (1972) <sup>111</sup>        | Lw-H-V     | 0.192        | 0.119              | 0.155        | 271.6         | 283.2         | 1.04            | 4.509           | 44         | Tr   |
| Wendland et al. (1999) <sup>112</sup>        | Lw-H-V     | 0.161        | 0.173              | 0.115        | 273.93        | 282.16        | 1.365           | 3.85            | 7          | Te   |
| Yasuda and Ohmura (2008) <sup>65</sup>       | I-H-V      | 0.675        | 0.132              | 0.489        | 244.5         | 269.4         | 0.364           | 0.963           | 10         | Tr   |
| Yasuda and Ohmura (2008) <sup>65</sup>       | Lw-H-V     | 0.156        | 0.119              | 0.222        | 273.8         | 275.7         | 1.312           | 1.628           | 2          | Tr   |
| Yasuda and Ohmura (2008) <sup>65</sup>       | I-Lw-H-V*  | 0.884        | 0.466              | 0.392        | 267.8         | 275           | 0.899           | 1.501           | 21         | Tr   |
| Yasuda and Ohmura (2008) <sup>65</sup>       | I-Lw-H-V   | 1.567        | 0.815              | 0.482        | 271.7         | 271.7         | 1.03            | 1.03            | 1          | Tr   |
| Yoon and Lee (1997) <sup>113</sup>           | Lw-H-V     | 0.101        | 0.064              | 0.329        | 275.4         | 282.4         | 1.56            | 3.89            | 4          | Te   |
| Yu et al. (2016) <sup>114</sup>              | Lw-H-V     | 0.158        | 0.184              | 0.076        | 275.7         | 279.7         | 1.641           | 2.761           | 5          | Tr   |
| Zha et al. (2012) <sup>115</sup>             | Lw-H-V     | 0.071        | 0.078              | 0.264        | 274.42        | 282.83        | 1.47            | 4.15            | 5          | Tr   |
| <b>Training</b>                              | —          | <b>0.285</b> | <b>0.220</b>       | <b>0.246</b> | <b>244.5</b>  | <b>288.45</b> | <b>0.364</b>    | <b>80</b>       | <b>243</b> | —    |

| Reference | Phases | AADT (K) | CPAHYD-MF AADT (K) | B&S AADT (K) | $T_{min}$ (K) | $T_{max}$ (K) | $P_{min}$ (MPa) | $P_{max}$ (MPa) | $N$ | Type |
|-----------|--------|----------|--------------------|--------------|---------------|---------------|-----------------|-----------------|-----|------|
| Test      | —      | 0.470    | 0.524              | 0.511        | 263.17        | 289.37        | 0.774           | 88.1            | 212 | —    |
| Overall   | —      | 0.371    | 0.362              | 0.370        | 244.5         | 289.37        | 0.364           | 88.1            | 455 | —    |

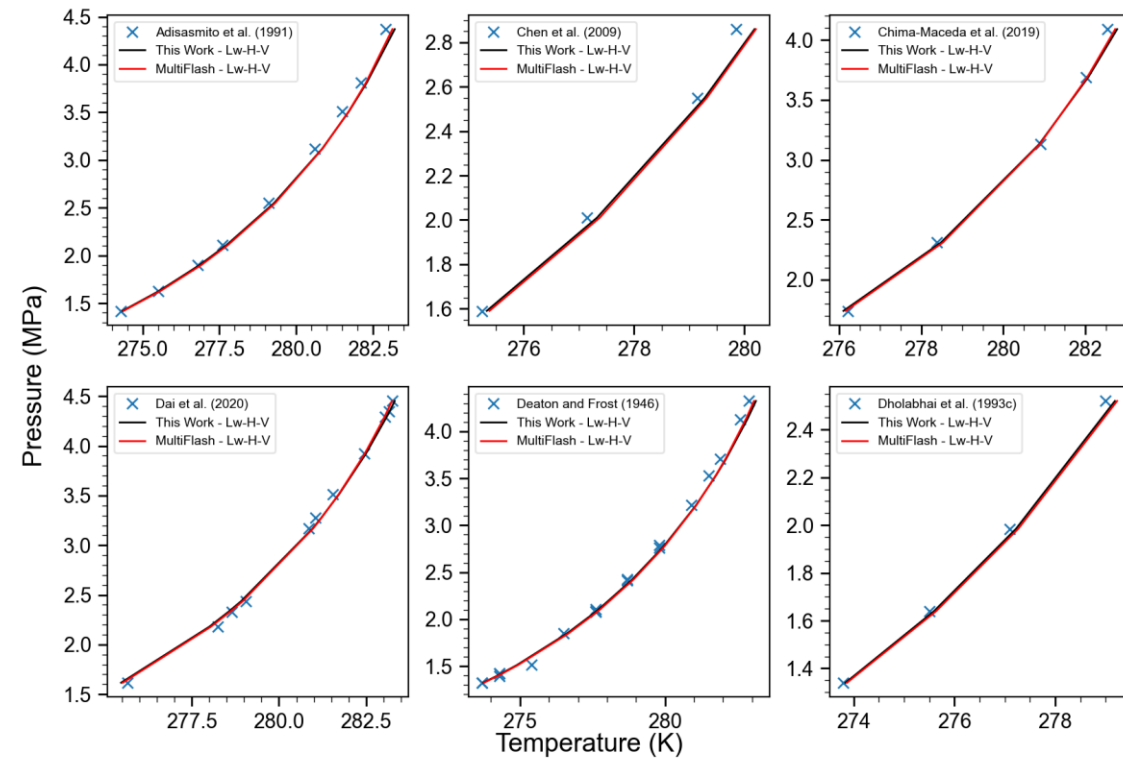

Figure S12: Selected hydrate equilibrium datasets (group 1) for simple CO<sub>2</sub> hydrates, along with the predictions from two models: the CaSH model (black) and the MultiFlash 7.0 CPA-Hydrates (red). Datasets:<sup>8,12,16,84–86</sup>

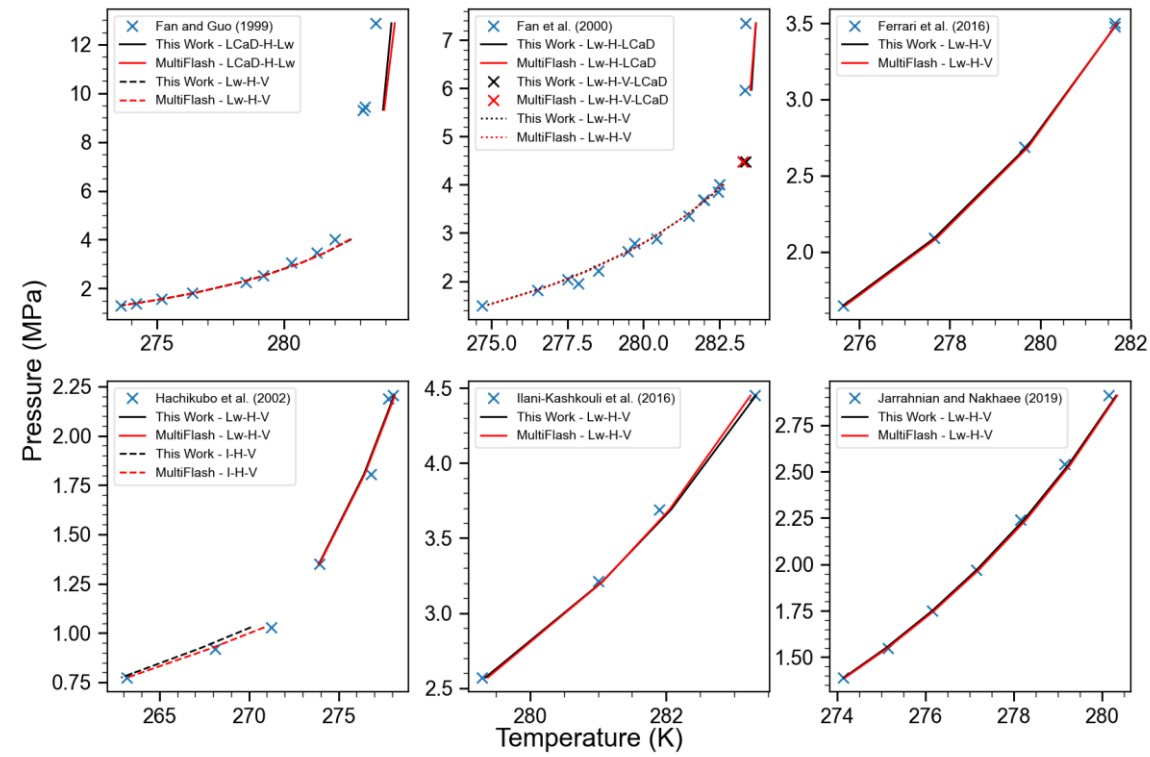

Figure S13: Selected hydrate equilibrium datasets (group 2) for simple CO<sub>2</sub> hydrates, along with the predictions from two models: the CaSH model (black) and the MultiFlash 7.0 CPA-Hydrates (red). Datasets:<sup>23,87-91</sup>

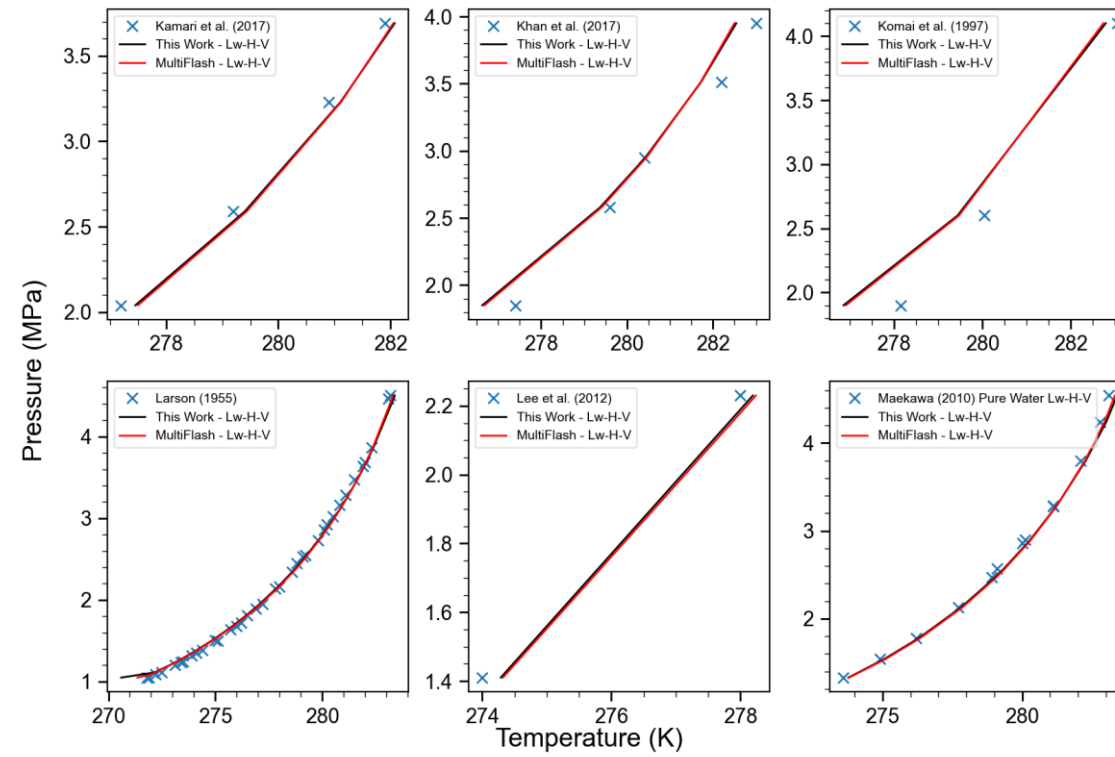

Figure S14: Selected hydrate equilibrium datasets (group 3) for simple CO<sub>2</sub> hydrates, along with the predictions from two models: the CaSH model (black) and the MultiFlash 7.0 CPA-Hydrates (red). Datasets:<sup>31,34,92-95</sup>

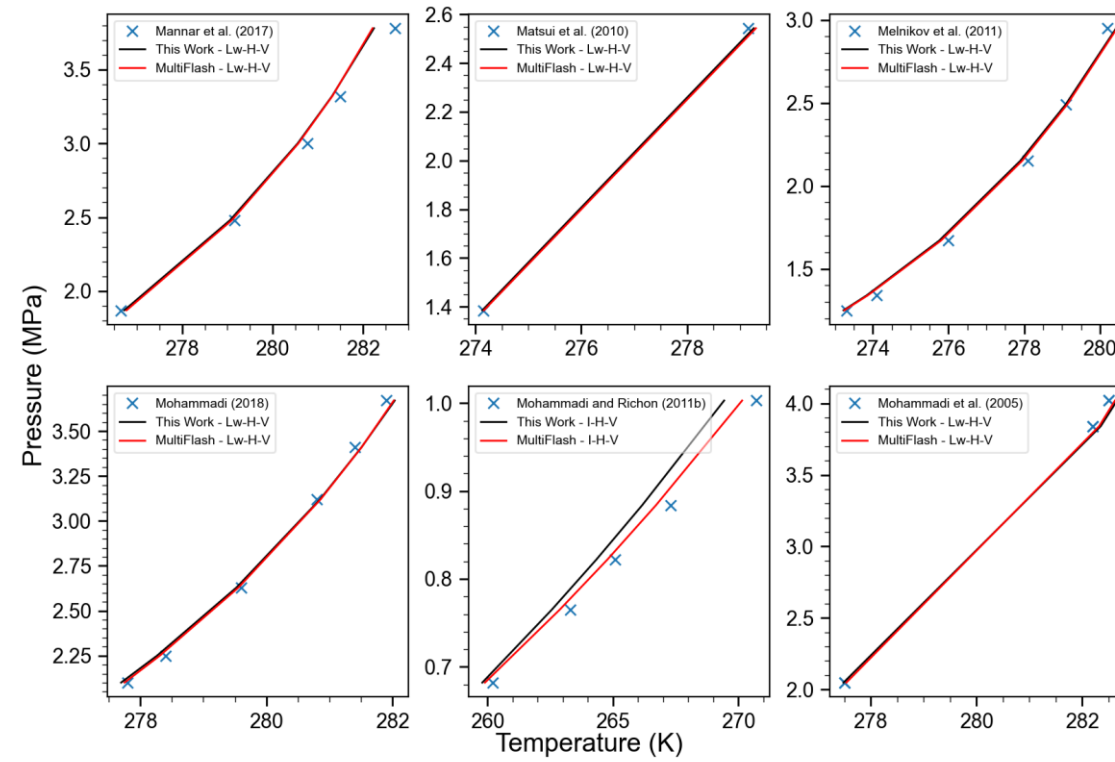

Figure S15: Selected hydrate equilibrium datasets (group 4) for simple CO<sub>2</sub> hydrates, along with the predictions from two models: the CaSH model (black) and the MultiFlash 7.0 CPA-Hydrates (red). Datasets:<sup>42,76,96-99</sup>

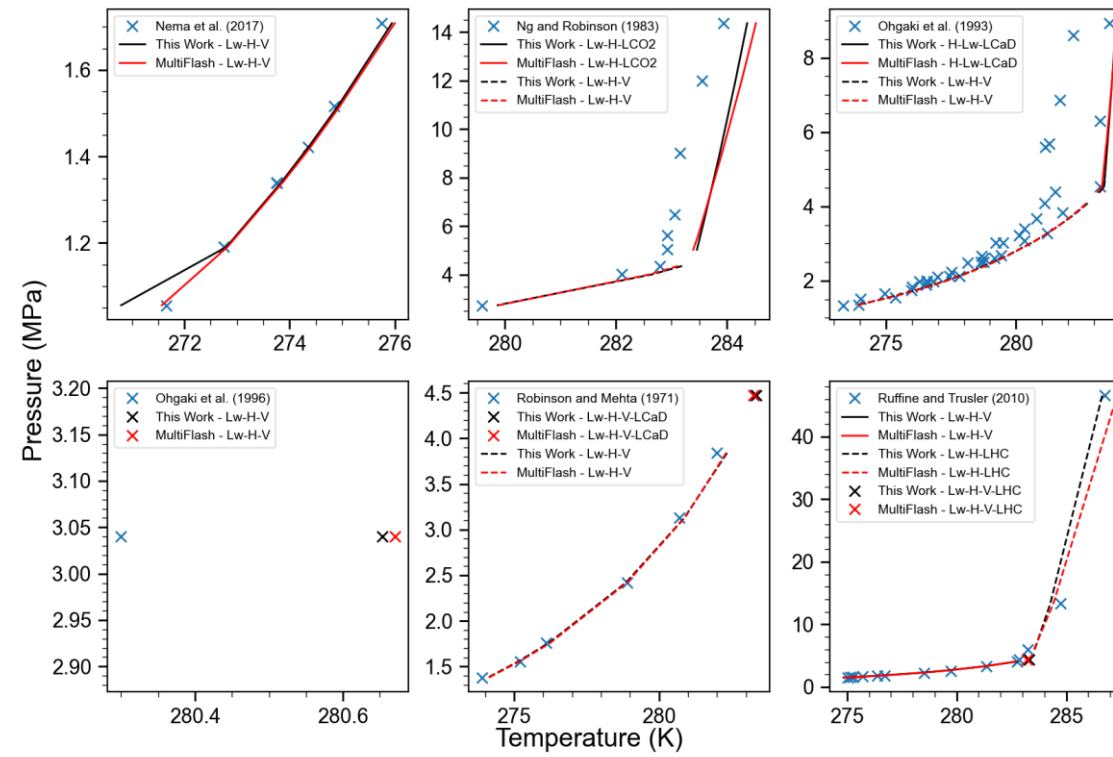

Figure S16: Selected hydrate equilibrium datasets (group 5) for simple CO<sub>2</sub> hydrates, along with the predictions from two models: the CaSH model (black) and the MultiFlash 7.0 CPA-Hydrates (red). Datasets:<sup>47,82,100-103</sup>

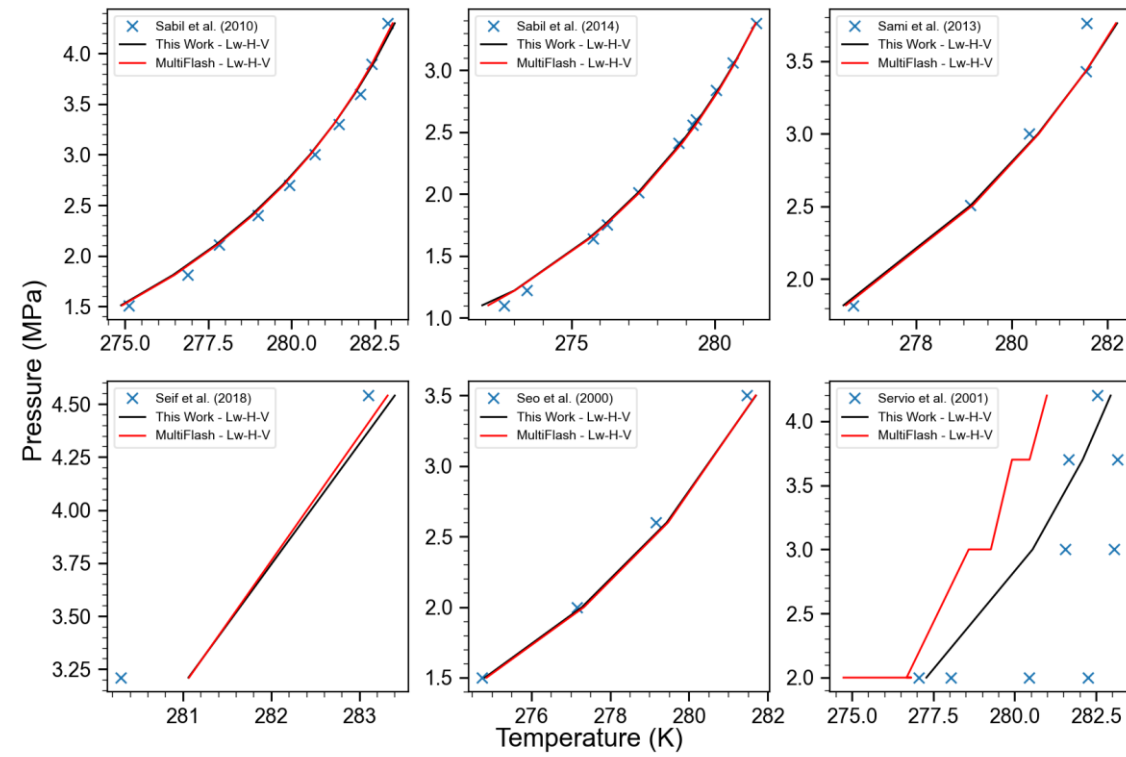

Figure S17: Selected hydrate equilibrium datasets (group 6) for simple CO<sub>2</sub> hydrates, along with the predictions from two models: the CaSH model (black) and the MultiFlash 7.0 CPA-Hydrates (red). Datasets:<sup>52,54,104-107</sup>

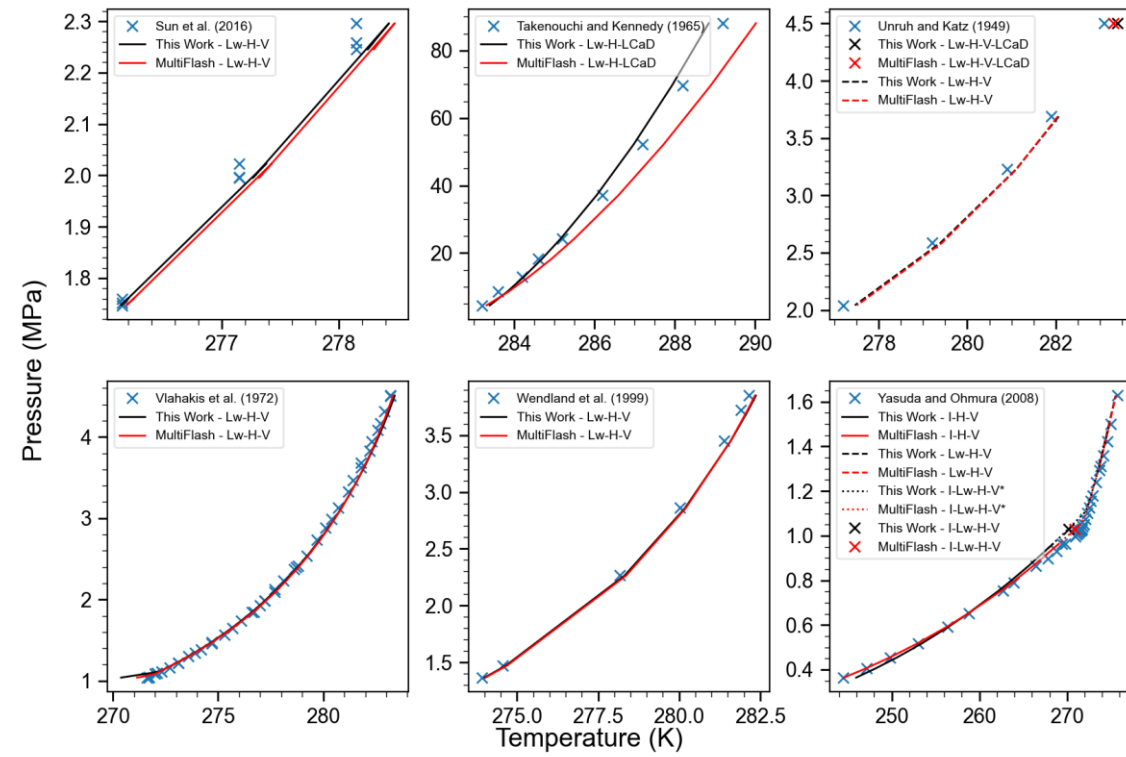

Figure S18: Selected hydrate equilibrium datasets (group 7) for simple CO<sub>2</sub> hydrates, along with the predictions from two models: the CaSH model (black) and the MultiFlash 7.0 CPA-Hydrates (red). Datasets:<sup>65,108–112</sup>



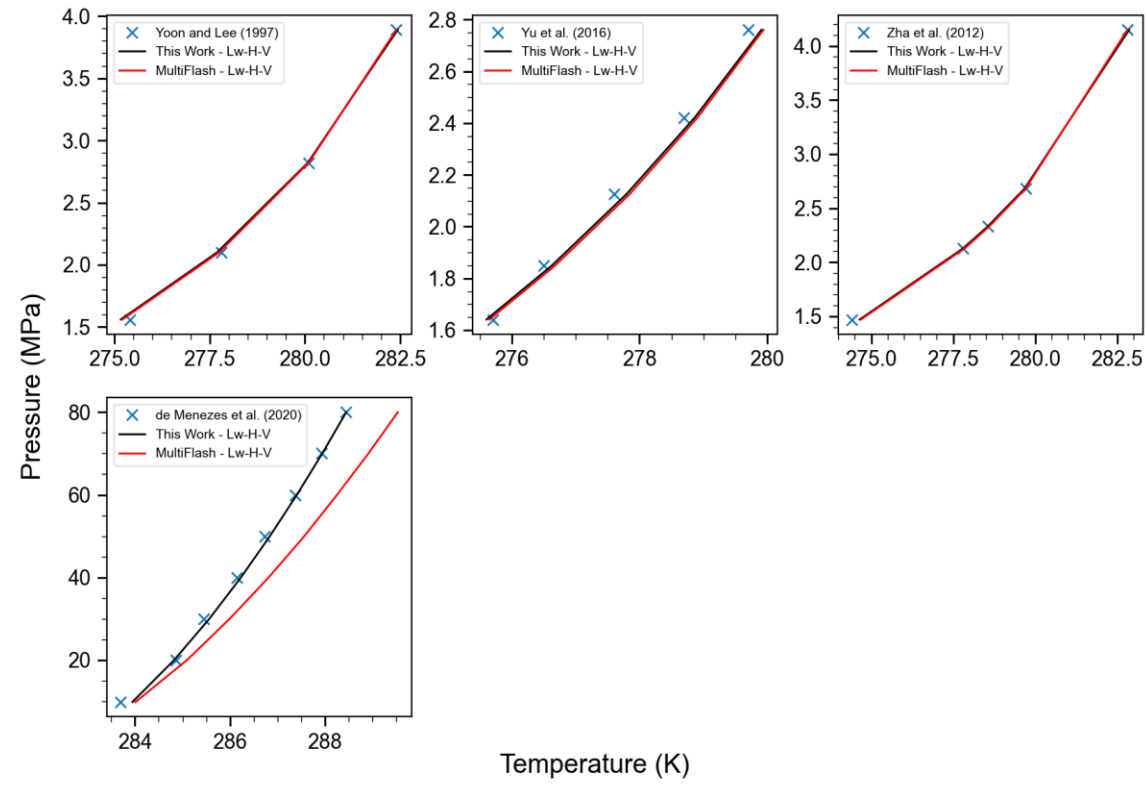

Figure S19: Selected hydrate equilibrium datasets (group 8) for simple CO<sub>2</sub> hydrates, along with the predictions from two models: the CaSH model (black) and the MultiFlash 7.0 CPA-Hydrates (red). Datasets:<sup>14,113–115</sup>

### 3.1.4. C<sub>3</sub>H<sub>8</sub> simple hydrate equilibria

Table S12: Database of C<sub>3</sub>H<sub>8</sub> simple hydrate phase equilibrium data, with comparison of the AADT of the cavity-based hydrate model with CPAHYD-MF and B&S. Data types: 'Tr' = Training data; 'Te' = Test data. In the phases type, I-Lw-H-V\* refers to measurements very close to the quadruple point (just above or below in temperature)

| Reference                                           | Phases          | AA DT (K)    | MF AADT (K)  | CSMGem AADT (K) | T <sub>min</sub> (K) | T <sub>max</sub> (K) | P <sub>min</sub> (MPa) | P <sub>max</sub> (MPa) | N          | Type |
|-----------------------------------------------------|-----------------|--------------|--------------|-----------------|----------------------|----------------------|------------------------|------------------------|------------|------|
| Holder and Godbole (1982) <sup>73</sup>             | I-H-V           | 1.104        | 0.673        | 2.406           | 247.9                | 262.1                | 0.0482                 | 0.0994                 | 8          | Tr   |
| Kubota et al. (1984) <sup>116</sup>                 | Lw-H-V          | 0.190        | 0.219        | 0.185           | 274.2                | 278.4                | 0.207                  | 0.542                  | 9          | Te   |
| Maekawa (2008) Pure Water <sup>117</sup>            | Lw-H-V          | 0.181        | 0.201        | 0.202           | 274.2                | 278.1                | 0.211                  | 0.509                  | 12         | Tr   |
| Mohammadi et al. (2008a) <sup>78</sup>              | Lw-H-V          | 0.335        | 0.364        | 0.096           | 274.6                | 278.3                | 0.22                   | 0.5                    | 3          | Te   |
| Mooijer-van den Heuvel et al. (2002) <sup>118</sup> | Lw-H-V          | 0.264        | 0.297        | 0.144           | 276.77               | 278.55               | 0.368                  | 0.547                  | 9          | Tr   |
|                                                     | Lw-H-V-LHC      | 0.288        | 0.376        | 0.117           | 278.62               | 278.62               | 0.6                    | 0.6                    | 1          | Tr   |
|                                                     | Lw-H-LHC        | 0.536        | 0.569        | 0.023           | 278.71               | 278.89               | 0.643                  | 9.893                  | 17         | Tr   |
| Nixdorf and Oellrich (1997) <sup>46</sup>           | Lw-H-V          | 0.071        | 0.103        | 0.337           | 273.55               | 278.52               | 0.186                  | 0.567                  | 10         | Tr   |
| Patil (1987) <sup>119</sup>                         | Lw-H-V          | 0.144        | 0.170        | 0.443           | 273.6                | 278                  | 0.207                  | 0.51                   | 5          | Te   |
| Reamer et al. (1952) <sup>83</sup>                  | Lw-H-V          | 0.163        | 0.181        | 0.448           | 274.3                | 277.2                | 0.241                  | 0.414                  | 3          | Te   |
|                                                     | Lw-H-LHC        | 0.382        | 0.457        | 0.076           | 278.6                | 278.8                | 0.684                  | 2.046                  | 3          | Te   |
| Robinson and Mehta (1971) <sup>102</sup>            | Lw-H-V          | 0.298        | 0.312        | 0.093           | 274.3                | 277.8                | 0.207                  | 0.455                  | 4          | Te   |
|                                                     | Lw-H-V-LHC      | 0.606        | 0.674        | 0.504           | 278.9                | 278.9                | 0.552                  | 0.552                  | 1          | Te   |
| Thakore and Holder (1987) <sup>59</sup>             | Lw-H-V          | 0.242        | 0.253        | 0.255           | 274.2                | 278.2                | 0.217                  | 0.51                   | 7          | Te   |
| Verma (1974) <sup>60</sup>                          | Lw-H-V,Lw-H-LHC | 0.265        | 0.282        | 0.122           | 273.9                | 278                  | 0.188                  | 0.512                  | 8          | Tr   |
|                                                     | Lw-H-V-LHC      | 0.317        | 0.298        | 0.336           | 278.4                | 278.6                | 0.562                  | 16.8                   | 5          | Te   |
| Yasuda and Ohmura (2008) <sup>65</sup>              | I-H-V           | 1.047        | 0.598        | 2.310           | 245                  | 272.1                | 0.041                  | 0.1627                 | 10         | Tr   |
|                                                     | Lw-H-V          | 0.217        | 0.215        | 0.191           | 273.9                | 275.5                | 0.194                  | 0.28                   | 2          | Tr   |
|                                                     | I-Lw-H-V*       | 0.360        | 0.254        | 0.851           | 267.8                | 276                  | 0.131                  | 0.309                  | 25         | Tr   |
|                                                     | I-Lw-H-V        | 0.490        | 0.351        | 0.277           | 273.2                | 273.2                | 0.17                   | 0.17                   | 1          | Tr   |
| <b>Training</b>                                     | —               | <b>0.447</b> | <b>0.358</b> | <b>0.707</b>    | <b>245</b>           | <b>278.89</b>        | <b>0.041</b>           | <b>9.893</b>           | <b>103</b> | —    |
| <b>Test</b>                                         | —               | <b>0.254</b> | <b>0.275</b> | <b>0.252</b>    | <b>273.6</b>         | <b>278.9</b>         | <b>0.207</b>           | <b>16.8</b>            | <b>40</b>  | —    |
| <b>Overall</b>                                      | —               | <b>0.393</b> | <b>0.335</b> | <b>0.580</b>    | <b>245</b>           | <b>278.9</b>         | <b>0.041</b>           | <b>16.8</b>            | <b>143</b> | —    |

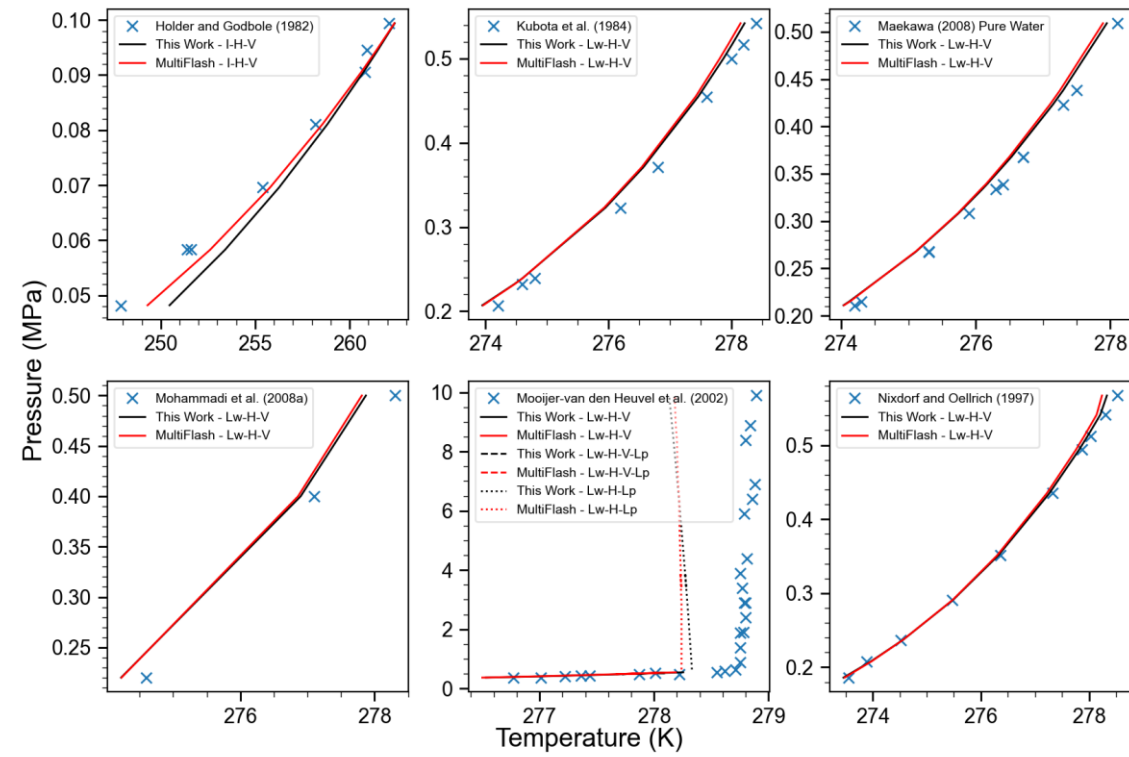

Figure S20: Selected hydrate equilibrium datasets (group 1) for simple propane hydrates, along with the predictions from two models: the CaSH model (black) and the MultiFlash 7.0 CPA-Hydrates (red). Datasets:<sup>46,73,78,116-118</sup>

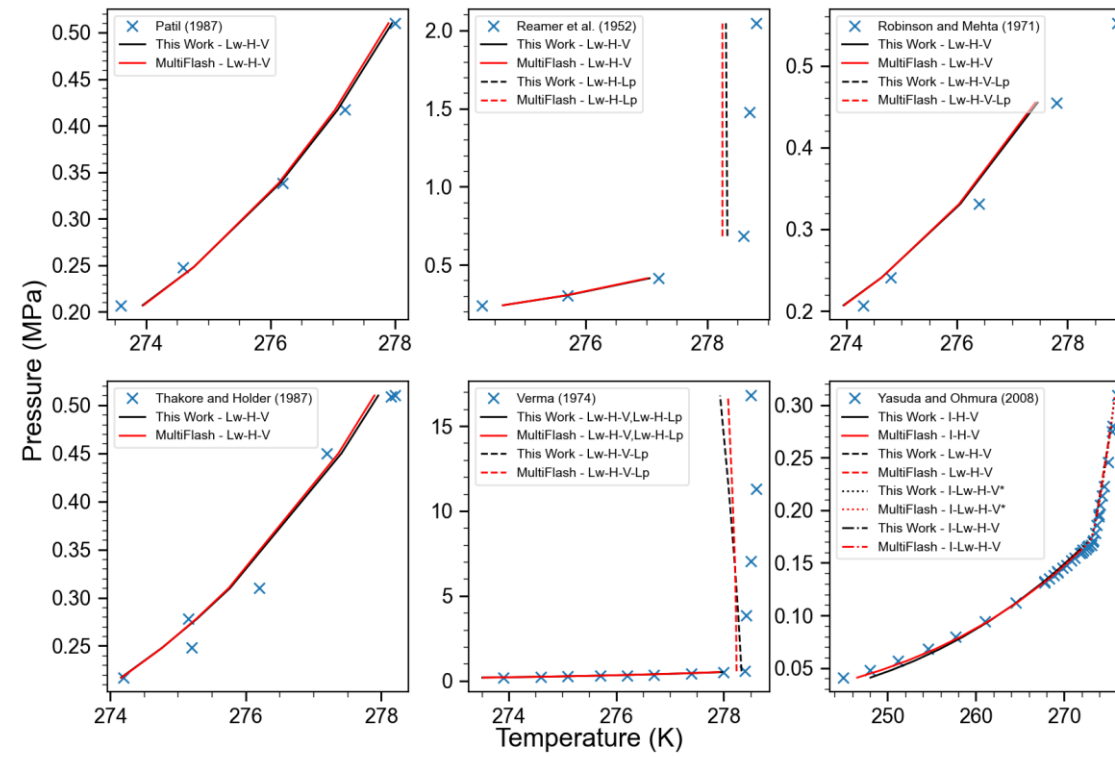

Figure S21: Selected hydrate equilibrium datasets (group 2) for simple propane hydrates, along with the predictions from two models: the CaSH model (black) and the MultiFlash 7.0 CPA-Hydrates (red). Datasets: <sup>59,60,65,83,102,119</sup>

### 3.1.5. N<sub>2</sub> simple hydrate equilibria

Table S13: Database of N<sub>2</sub> simple hydrate equilibrium data, with comparison of the AADT of the cavity-based model with CPAHYD-MF and B&S. Data types: 'Tr' = Training Data; 'Te' = Test Data.

| Reference                                   | Phases | AADT (K)     | CPAHYD-MF AADT (K) | B&S AADT (K) | T <sub>min</sub> (K) | T <sub>max</sub> (K) | P <sub>min</sub> (MPa) | P <sub>max</sub> (MPa) | N         | Type |
|---------------------------------------------|--------|--------------|--------------------|--------------|----------------------|----------------------|------------------------|------------------------|-----------|------|
| Jarrahan and Nakhaee (2019) <sup>91</sup>   | Lw-H-V | 0.124        | 0.187              | 0.067        | 274.15               | 280.15               | 17.95                  | 32.91                  | 7         | Tr   |
| Jhaveri and Robinson (1965) <sup>30</sup>   | Lw-H-V | 0.190        | 0.206              | 0.164        | 273.2                | 281.1                | 16.27                  | 35.16                  | 8         | Tr   |
| Lee et al. (2014) <sup>120</sup>            | Lw-H-V | 0.304        | 0.283              | 0.326        | 273                  | 277.5                | 16.13                  | 23.9                   | 7         | Tr   |
| Marshall et al. (1964) <sup>39</sup>        | Lw-H-V | 0.133        | 0.325              | 0.097        | 277.6                | 291.6                | 24.93                  | 101.98                 | 4         | Te   |
| Mohammadi and Richon (2010) <sup>77</sup>   | I-H-V  | 0.301        | 1.029              | 1.143        | 261.7                | 270.2                | 11.25                  | 13.8                   | 6         | Tr   |
| Mohammadi et al. (2003) <sup>41</sup>       | Lw-H-V | 0.262        | 0.371              | 0.171        | 274.55               | 283.05               | 19.093                 | 45.355                 | 3         | Te   |
| Nixdorf and Oelrich (1997) <sup>46</sup>    | Lw-H-V | 0.047        | 0.023              | 0.083        | 273.67               | 277.27               | 16.935                 | 24.092                 | 5         | Te   |
| Sugahara et al. (2002) <sup>121</sup>       | Lw-H-V | 0.654        | 0.134              | 0.473        | 285.63               | 291.96               | 55                     | 101                    | 5         | Te   |
| van Cleeff and Diepen (1960) <sup>122</sup> | Lw-H-V | 0.301        | 1.029              | 1.143        | 261.7                | 270.2                | 11.25                  | 13.8                   | 6         | Tr   |
| Yasuda et al. (2013) I-H-V <sup>123</sup>   | I-H-V  | 0.454        | 2.157              | 1.960        | 244.05               | 266.55               | 7.151                  | 12.613                 | 7         | Tr   |
| <b>Training</b>                             | —      | <b>0.221</b> | <b>0.520</b>       | <b>0.391</b> | <b>244.05</b>        | <b>291</b>           | <b>7.151</b>           | <b>95.86</b>           | <b>73</b> | —    |
| <b>Test</b>                                 | —      | <b>0.284</b> | <b>0.188</b>       | <b>0.217</b> | <b>273.67</b>        | <b>291.96</b>        | <b>16.935</b>          | <b>101.98</b>          | <b>17</b> | —    |
| <b>Overall</b>                              | —      | <b>0.233</b> | <b>0.457</b>       | <b>0.358</b> | <b>244.05</b>        | <b>291.96</b>        | <b>7.151</b>           | <b>101.98</b>          | <b>90</b> | —    |

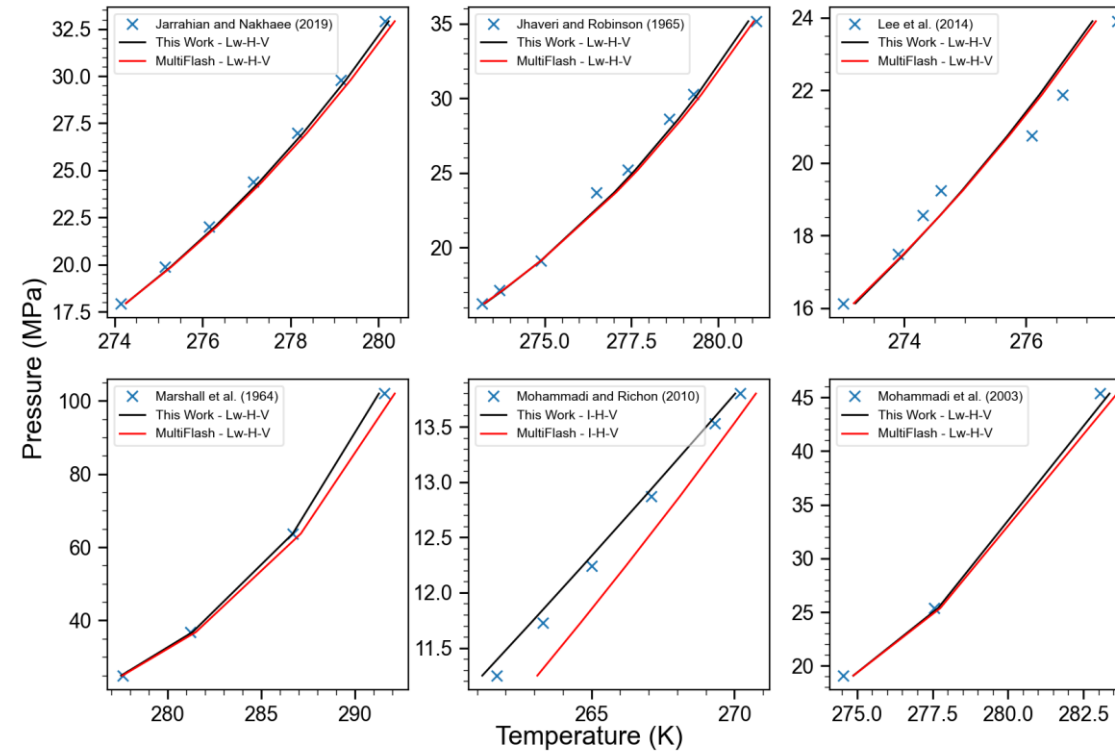

Figure S22: Selected hydrate equilibrium datasets (group 1) for simple  $N_2$  hydrates, along with the predictions from two models: the CaSH model (black) and the MultiFlash 7.0 CPA-Hydrates (red). Datasets:<sup>30,39,41,77,91,120</sup>

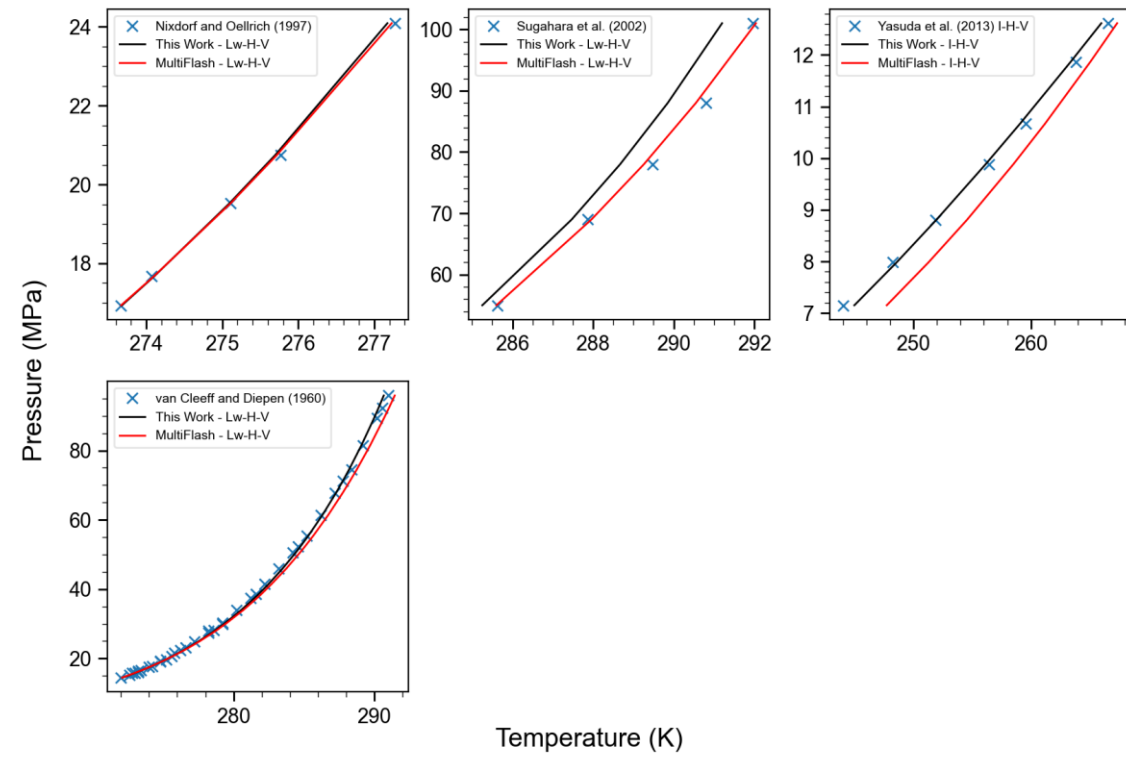

Figure S23: Selected hydrate equilibrium datasets (group 2) for simple N<sub>2</sub> hydrates, along with the predictions from two models: the CaSH model (black) and the MultiFlash 7.0 CPA-Hydrates (red). Datasets:<sup>46,121–123</sup>

### 3.1.6. H<sub>2</sub>S simple hydrate equilibria

Table S14: Database of H<sub>2</sub>S simple hydrate equilibrium data, with comparison of the AADT of the cavity-based model with CPAHYD-MF and B&S. Data types: 'Tr' = Training Data; 'Te' = Test Data.

| Reference                                 | Phases      | AADT (K)     | MF AADT (K)  | CSMGem AADT (K) | T <sub>min</sub> (K) | T <sub>max</sub> (K) | P <sub>min</sub> (MPa) | P <sub>max</sub> (MPa) | N          | Type |
|-------------------------------------------|-------------|--------------|--------------|-----------------|----------------------|----------------------|------------------------|------------------------|------------|------|
| Adeniyi et al. (2018) <sup>124</sup>      | Lw-H-V      | 0.338        | 0.323        | 0.379           | 285.23               | 302.44               | 0.36                   | 2.234                  | 14         | Tr   |
|                                           | Lw-H-LHC    | 1.351        | 0.138        | 0.074           | 302.72               | 304.04               | 2.401                  | 16.343                 | 13         | Te   |
| Bond and Russell (1949) <sup>125</sup>    | Lw-H-V      | 0.805        | 0.773        | 0.854           | 283.2                | 302.7                | 0.31                   | 2.241                  | 4          | Te   |
| Carroll and Mather (1991) <sup>126</sup>  | LHC-H-V     | 1.241        | 2.818        | 1.818           | 298                  | 302.6                | 2.03                   | 2.24                   | 19         | Te   |
|                                           | Lw-H-V      | 1.105        | 1.122        | 1.161           | 298.6                | 300.8                | 1.61                   | 2.07                   | 13         | Te   |
| Mahadev and Bishnoi (1999) <sup>127</sup> | Lw-H-V      | 0.113        | 0.302        | 0.449           | 284.57               | 293.75               | 0.329                  | 0.804                  | 3          | Tr   |
| Mohammadi et al. (2009b) <sup>128</sup>   | Lw-H-V      | 0.156        | 0.484        | 0.634           | 277.7                | 301.3                | 0.164                  | 1.861                  | 19         | Tr   |
| Selleck et al. (1952) <sup>129</sup>      | I-Lw-H-V    | 1.811        | 0.563        | 0.365           | 272.8                | 272.8                | 0.093                  | 0.093                  | 2          | Te   |
|                                           | Lw-H-V      | 0.509        | 0.435        | 0.511           | 272.8                | 302.1                | 0.093                  | 2.068                  | 12         | Te   |
|                                           | Lw-H-V-LH2S | 1.046        | 0.114        | 0.140           | 302.7                | 302.7                | 2.239                  | 2.239                  | 6          | Te   |
|                                           | I-H-V       | 1.069        | 0.224        | 1.581           | 250.5                | 272.1                | 0.034                  | 0.09                   | 9          | Te   |
|                                           | Lw-H-LH2S   | 1.608        | 0.055        | 0.134           | 302.8                | 305.4                | 3.447                  | 35.068                 | 15         | Te   |
| Ward et al. (2015) <sup>61</sup>          | Lw-H-V      | 0.199        | 0.204        | 0.398           | 273.68               | 301.53               | 0.1078                 | 1.9598                 | 61         | Tr   |
| <b>Training</b>                           | —           | <b>0.208</b> | <b>0.279</b> | <b>0.443</b>    | <b>273.68</b>        | <b>302.44</b>        | <b>0.1078</b>          | <b>2.234</b>           | <b>97</b>  | —    |
| <b>Test</b>                               | —           | <b>1.166</b> | <b>0.891</b> | <b>0.838</b>    | <b>250.5</b>         | <b>305.4</b>         | <b>0.034</b>           | <b>35.068</b>          | <b>93</b>  | —    |
| <b>Overall</b>                            | —           | <b>0.677</b> | <b>0.455</b> | <b>0.636</b>    | <b>250.5</b>         | <b>305.4</b>         | <b>0.034</b>           | <b>35.068</b>          | <b>190</b> | —    |



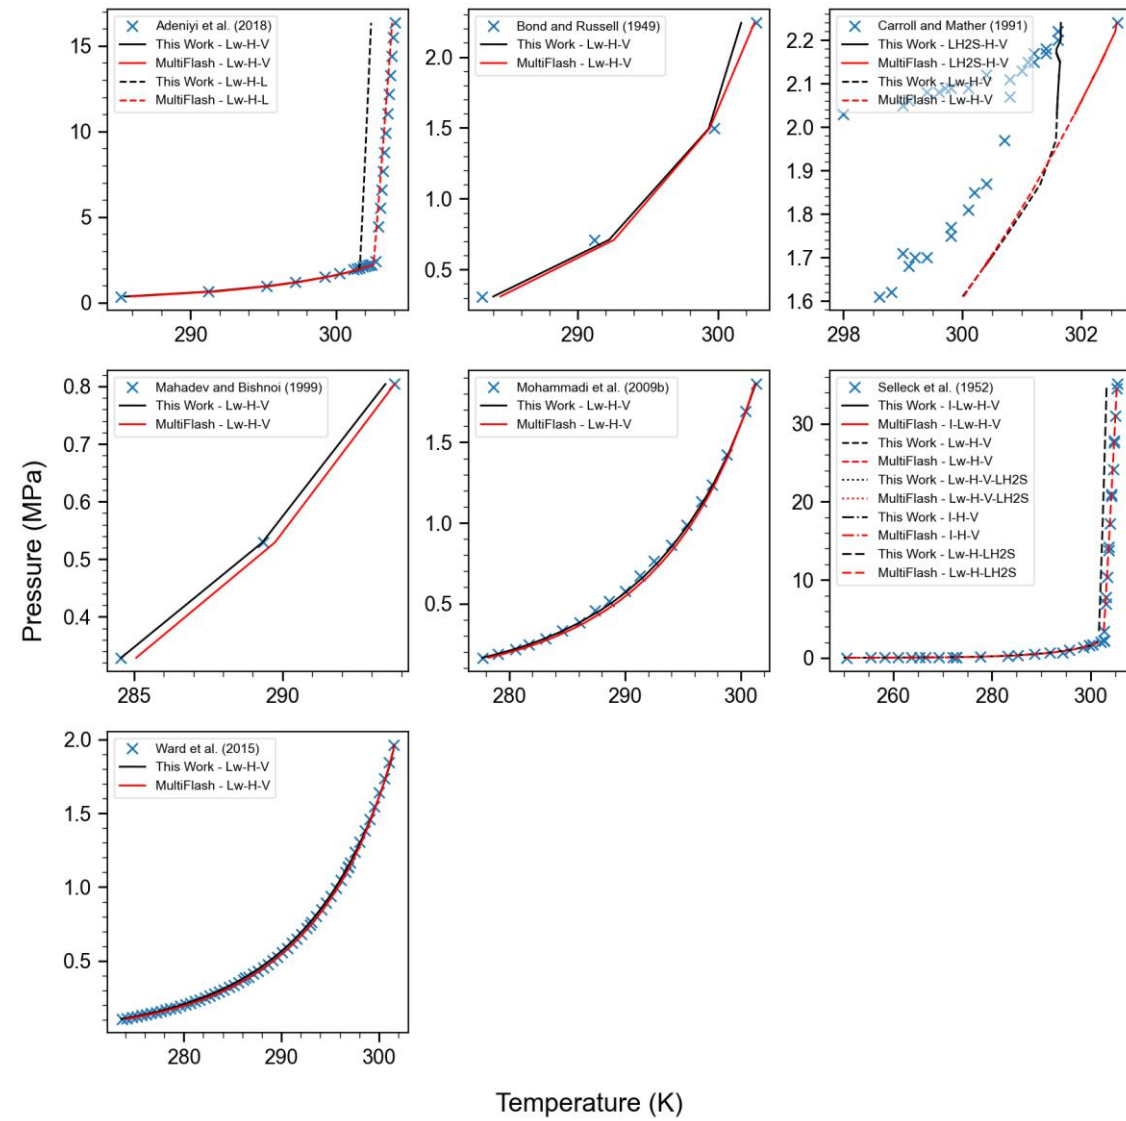

Figure S24: Selected hydrate equilibrium datasets for simple  $\text{H}_2\text{S}$  hydrates, along with the predictions from two models: the CaSH model (black) and the MultiFlash 7.0 CPA-Hydrates (red).

Datasets: <sup>61,124–127,129,130</sup>

### 3.1.7. $i\text{-C}_4\text{H}_{10}$ simple hydrate equilibria

Table S15: Database of  $i\text{-C}_4\text{H}_{10}$  simple hydrate equilibrium data, with comparison of the AADT of the cavity-based hydrate model with CPAHYD-MF and B&S. Data types: 'Tr' = Training data; 'Te' = Test data.

| Reference                                  | Phases   | AADT (K)     | MF AADT (K)  | CSMGem AADT (K) | $T_{min}$ (K) | $T_{max}$ (K) | $P_{min}$ (MPa) | $P_{max}$ (MPa) | $N$       | Type |
|--------------------------------------------|----------|--------------|--------------|-----------------|---------------|---------------|-----------------|-----------------|-----------|------|
| Holder and Godbole (1982) <sup>73</sup>    | I-H-V    | 1.999        | 0.768        | 1.456           | 241.4         | 269.5         | 0.0176          | 0.0913          | 10        | Te   |
| Rouher and Barduhn (1969) <sup>131</sup>   | Lw-H-V   | 0.114        | 0.238        | 0.170           | 273.2         | 275           | 0.115           | 0.169           | 24        | Tr   |
| Schneider and Farrar (1968) <sup>132</sup> | I-H-V    | 0.545        | 0.599        | 0.557           | 271.2         | 275.1         | 0.095           | 0.109           | 7         | Tr   |
|                                            | Lw-H-V   | 0.060        | 0.152        | 0.094           | 273.2         | 275.1         | 0.109           | 0.167           | 10        | Tr   |
| Thakore and Holder (1987) <sup>59</sup>    | Lw-H-V   | 0.368        | 0.336        | 0.345           | 274.35        | 274.6         | 0.128           | 0.155           | 3         | Tr   |
| Wu et al. (1976) <sup>133</sup>            | Lw-H-LHC | 0.330        | 0.094        | 0.261           | 275.4         | 275.8         | 0.226           | 14.27           | 6         | Tr   |
| <b>Training</b>                            | —        | <b>0.205</b> | <b>0.260</b> | <b>0.230</b>    | <b>271.2</b>  | <b>275.8</b>  | <b>0.095</b>    | <b>14.27</b>    | <b>50</b> | —    |
| <b>Test</b>                                | —        | <b>1.999</b> | <b>0.768</b> | <b>1.456</b>    | <b>241.4</b>  | <b>269.5</b>  | <b>0.0176</b>   | <b>0.0913</b>   | <b>10</b> | —    |
| <b>Overall</b>                             | —        | <b>0.504</b> | <b>0.345</b> | <b>0.435</b>    | <b>241.4</b>  | <b>275.8</b>  | <b>0.0176</b>   | <b>14.27</b>    | <b>60</b> | —    |

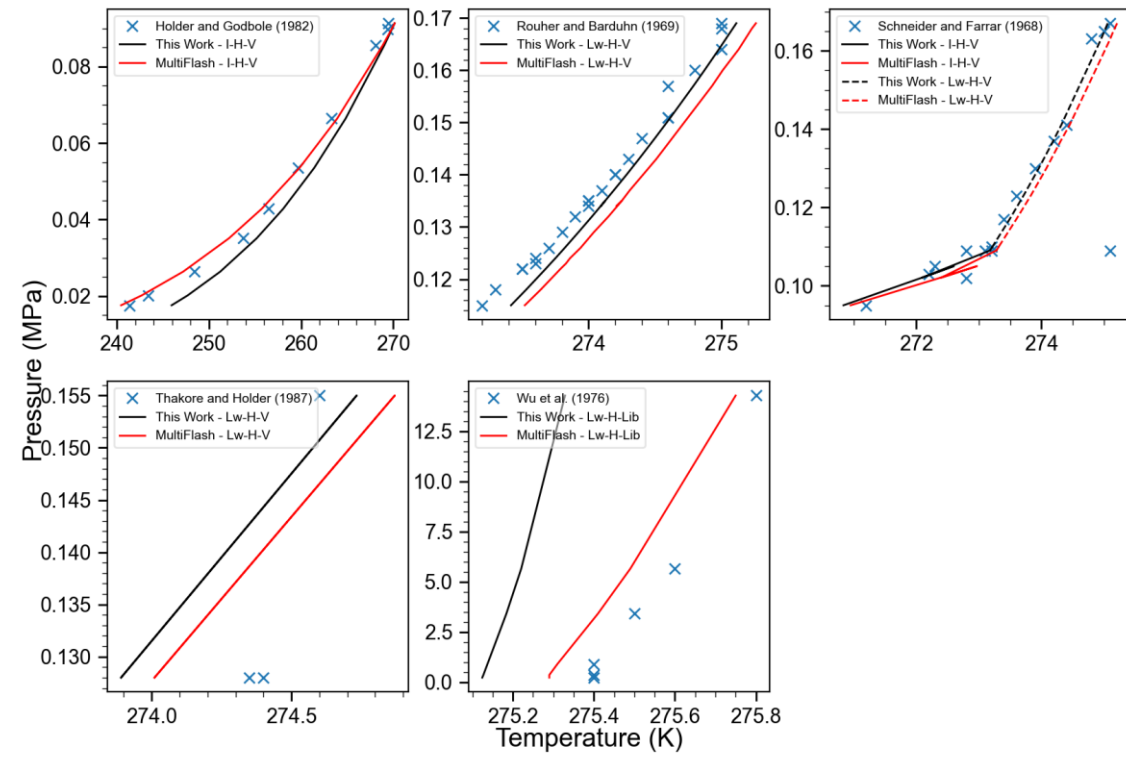

Figure S25: Selected hydrate equilibrium datasets for simple  $i\text{-C}_4\text{H}_{10}$  hydrates, along with the predictions from two models: the CaSH model (black) and the MultiFlash 7.0 CPA-Hydrates (red).

Datasets:<sup>59,73,131–133</sup>

### 3.2. Binary-gas-hydrate equilibria

In these tables, two new columns,  $x_{1,min}$  and  $x_{1,max}$  are introduced, representing the range of the gaseous composition of component 1 for the binary-gas hydrate equilibrium data measured in the given reference. In all tables, the first component in the caption is component 1, and the second is component 2, where  $x_1 + x_2 = 1$  for the water-free composition.

As some datasets are measured at fixed pressures and temperatures with varying gas composition, only those datasets that have a fixed gas composition with at least 3 measured PT points are plotted.

#### 3.2.1. CH<sub>4</sub> + C<sub>3</sub>H<sub>8</sub> binary- gas mixture hydrate equilibria

Table S16: Database of CH<sub>4</sub> and C<sub>3</sub>H<sub>8</sub> binary-gas mixture hydrate equilibrium data, with comparison of the AADT of the cavity-based hydrate model with CPAHYD-MF and B&S. Data types: 'Tr' = Training data; 'Te' = Test data.

| Reference                                | Phases     | Structure | AA DT (K)    | MF AADT (K)  | CSMGem AADT (K) | T <sub>min</sub> (K) | T <sub>max</sub> (K) | P <sub>min</sub> (MPa) | P <sub>max</sub> (MPa) | x <sub>1,min</sub> | x <sub>1,max</sub> | N          | Type |
|------------------------------------------|------------|-----------|--------------|--------------|-----------------|----------------------|----------------------|------------------------|------------------------|--------------------|--------------------|------------|------|
| Deaton and Frost (1946) <sup>16</sup>    | Lw-H-V     | II        | 0.163        | 0.248        | 0.37544         | 274.8                | 283.2                | 0.272                  | 4.358                  | 0.3620             | 0.9900             | 25         | Tr   |
| Hemmingsen et al. (2011) <sup>134</sup>  | Lw-H-V     | II        | 0.292        | 0.220        | 0.413667        | 279.95               | 297.55               | 1.12                   | 13.36                  | 0.8813             | 0.8813             | 3          | Tr   |
| McLeod and Campbell (1961) <sup>40</sup> | Lw-H-V     | II        | 0.141        | 0.248        | 0.650235        | 290.5                | 304.9                | 6.93                   | 68.98                  | 0.9450             | 0.9650             | 17         | Tr   |
| Nixdorf and Oelrich (1997) <sup>46</sup> | Lw-H-V     | II        | 0.812        | 1.024        | 0.288286        | 278.09               | 297.53               | 1.416                  | 24.363                 | 0.9707             | 0.9707             | 7          | Tr   |
| Ovalle and Beltran (2021) <sup>135</sup> | Lw-H-V     | II        | 0.529        | 0.818        | 0.35125         | 276.62               | 287.25               | 0.72                   | 4.46                   | 0.9000             | 0.9800             | 12         | Te   |
| Paranjpe et al. (1987) <sup>136</sup>    | Lw-H-V-LHC | II        | 0.336        | 0.117        | 0.210667        | 279.2                | 281.2                | 0.674                  | 0.832                  | 0.0100             | 0.1110             | 3          | Tr   |
| Smith et al. (2017) <sup>137</sup>       | Lw-H-V     | II        | 0.363        | 0.325        | 1.30115         | 278.45               | 295.35               | 2.36                   | 16.75                  | 0.9597             | 0.9948             | 20         | Tr   |
| Thakore and Holder (1987) <sup>59</sup>  | Lw-H-V     | II        | 0.306        | 0.415        | 0.381179        | 275.15               | 278.15               | 0.245                  | 1.306                  | 0.0210             | 0.9560             | 28         | Te   |
| Verma et al. (1974) <sup>60</sup>        | Lw-H-V     | II        | 0.151        | 0.110        | 0.12525         | 274.4                | 282.3                | 0.263                  | 0.945                  | 0.0072             | 0.6510             | 12         | Tr   |
|                                          | Lw-H-V-LHC | II        | 0.379        | 0.598        | 0.360617        | 279.6                | 300.2                | 0.66                   | 17.49                  | 0.0072             | 0.6510             | 60         | Te   |
| <b>Training</b>                          | —          | —         | <b>0.266</b> | <b>0.304</b> | <b>0.596</b>    | <b>274.4</b>         | <b>304.9</b>         | <b>0.263</b>           | <b>68.98</b>           | <b>0.0072</b>      | <b>0.9948</b>      | <b>87</b>  | —    |
| <b>Test</b>                              | —          | —         | <b>0.377</b> | <b>0.573</b> | <b>0.365</b>    | <b>275.15</b>        | <b>300.2</b>         | <b>0.245</b>           | <b>17.49</b>           | <b>0.0072</b>      | <b>0.9800</b>      | <b>100</b> | —    |
| <b>Overall</b>                           | —          | —         | <b>0.325</b> | <b>0.448</b> | <b>0.472631</b> | <b>274.4</b>         | <b>304.9</b>         | <b>0.245</b>           | <b>68.98</b>           | <b>0.0072</b>      | <b>0.9948</b>      | <b>187</b> | —    |

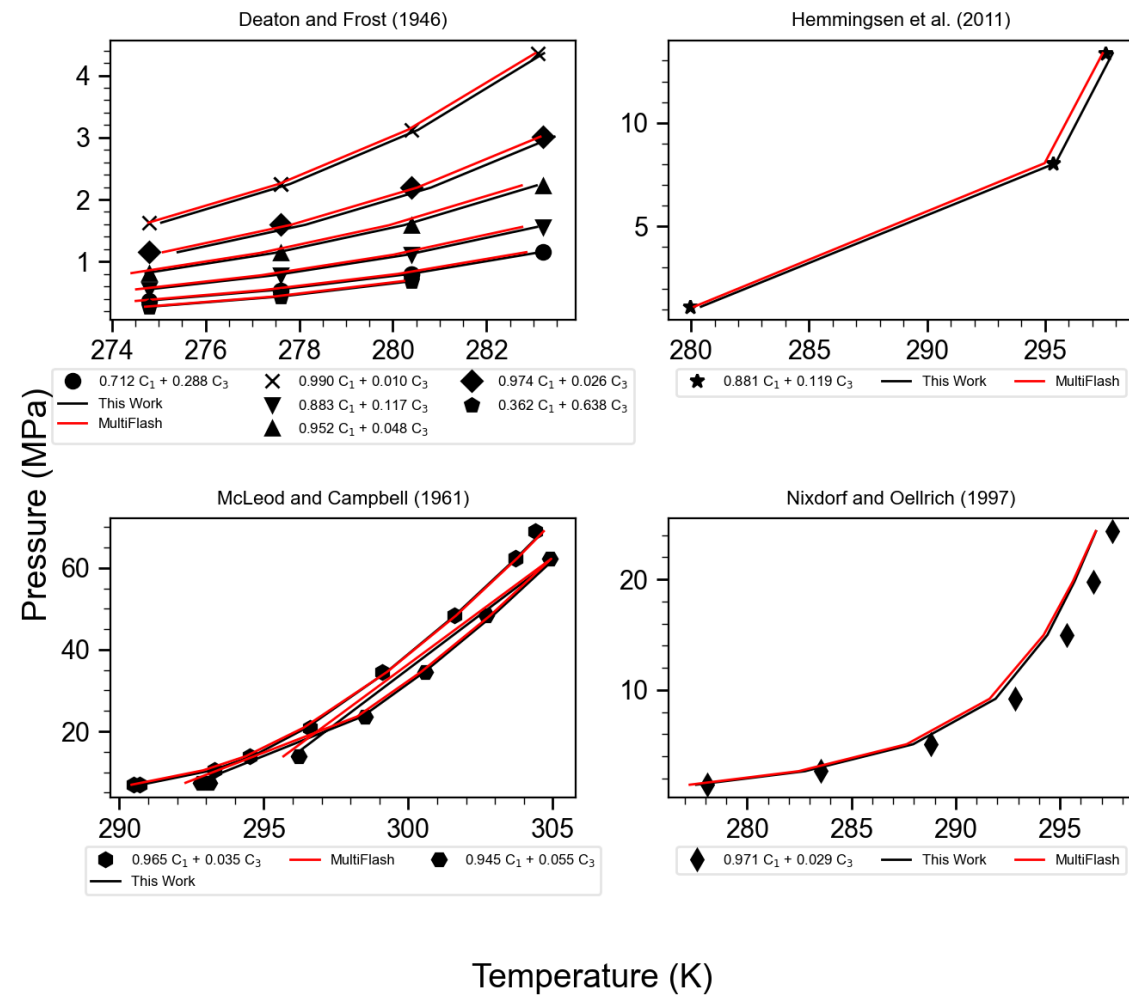

Figure S26: Selected hydrate equilibrium datasets for  $\text{CH}_4 + \text{C}_3\text{H}_8$  binary-gas mixture hydrates, along with the predictions from two models: the CaSH model (black) and the MultiFlash 7.0 CPA-Hydrates (red). Datasets:<sup>16,40,46,134</sup>

### 3.2.2. CH<sub>4</sub> + C<sub>2</sub>H<sub>6</sub> binary-gas mixture hydrate equilibria

Table S17: Database of CH<sub>4</sub> and C<sub>2</sub>H<sub>6</sub> binary-gas mixture hydrate equilibrium data, with comparison of the AADT of the cavity-based hydrate model with CPAHYD-MF and B&S. Data types: 'Tr' = Training data; 'Te' = Test data.

| Reference                                 | Phases | Structure | AA DT (K)    | MF AADT (K)  | CSMGem AADT (K) | T <sub>min</sub> (K) | T <sub>max</sub> (K) | P <sub>min</sub> (MPa) | P <sub>max</sub> (MPa) | x <sub>1,min</sub> | x <sub>1,max</sub> | N          | Type |
|-------------------------------------------|--------|-----------|--------------|--------------|-----------------|----------------------|----------------------|------------------------|------------------------|--------------------|--------------------|------------|------|
| Bruusgaard et al. (2010) <sup>138</sup>   | Lw-H-V | II        | 0.118        | 0.648        | 0.249           | 275.3                | 281.1                | 1.41                   | 2.65                   | 0.3030             | 0.8390             | 5          | Te   |
|                                           | Lw-H-V | I         | 0.452        | 0.231        | 0.239           | 275.1                | 281.2                | 0.69                   | 1.92                   | 0.3030             | 0.8390             | 11         | Te   |
| Deaton and Frost (1946) <sup>16</sup>     | Lw-H-V | II        | 0.329        | 0.213        | 0.285           | 274.8                | 283.2                | 1.524                  | 6.088                  | 0.5640             | 0.1018             | 20         | Tr   |
|                                           | Lw-H-V | I         | 0.027        | 0.303        | 0.393           | 274.8                | 283.2                | 0.945                  | 2.434                  | 0.5640             | 0.1018             | 4          | Tr   |
| Hashimoto et al. (2008) <sup>71</sup>     | Lw-H-V | I         | 0.339        | 0.186        | 0.170           | 279.1                | 288.1                | 1.12                   | 12.3                   | 0.1020             | 0.9910             | 21         | Te   |
|                                           | Lw-H-V | II        | 0.358        | 0.795        | 0.411           | 279.1                | 288.1                | 1.89                   | 11.9                   | 0.1020             | 0.9910             | 34         | Te   |
| Holder and Grigoriou (1980) <sup>72</sup> | Lw-H-V | I         | 0.235        | 0.244        | 0.242           | 279.4                | 287.8                | 0.99                   | 3.08                   | 0.0160             | 0.1770             | 15         | Tr   |
| Hu et al. (2018) <sup>139</sup>           | Lw-H-V | II        | 0.207        | 1.197        | 0.709           | 299.05               | 304.25               | 33.7                   | 68                     | 0.7470             | 0.7470             | 3          | Te   |
| Maekawa (2001) <sup>37</sup>              | Lw-H-V | II        | 0.141        | 0.526        | 0.229           | 275.4                | 289.6                | 1.7                    | 11.1                   | 0.9020             | 0.1019             | 48         | Te   |
|                                           | Lw-H-V | I         | 0.094        | 0.104        | 0.083           | 283.1                | 285.4                | 6.9                    | 8.9                    | 0.9020             | 0.1019             | 4          | Te   |
| McLeod and Campbell (1961) <sup>40</sup>  | Lw-H-V | II        | 0.514        | 1.252        | 0.684           | 284.9                | 304.1                | 6.93                   | 68.57                  | 0.8090             | 0.9460             | 14         | Tr   |
|                                           | Lw-H-V | I         | 0.611        | 1.041        | 0.089           | 301.2                | 302                  | 62.23                  | 68.43                  | 0.8090             | 0.9460             | 2          | Te   |
| Nixdorf and Oelrich (1997) <sup>46</sup>  | Lw-H-V | II        | 0.270        | 0.411        | 0.152           | 278.21               | 295.52               | 2.254                  | 23.1101                | 0.9047             | 0.9047             | 8          | Tr   |
| Subramanian et al. (2000) <sup>140</sup>  | Lw-H-V | II        | 0.581        | 0.057        | 0.817           | 274.2                | 274.2                | 0.1016                 | 1.448                  | 0.5810             | 0.9180             | 3          | Te   |
|                                           | Lw-H-V | I         | 0.490        | 0.042        | 0.604           | 274.2                | 274.2                | 0.883                  | 0.972                  | 0.5810             | 0.9180             | 3          | Tr   |
| <b>Training</b>                           | —      | —         | <b>0.329</b> | <b>0.470</b> | <b>0.367</b>    | <b>274.2</b>         | <b>304.1</b>         | <b>0.883</b>           | <b>68.57</b>           | <b>0.0160</b>      | <b>0.9460</b>      | <b>64</b>  | —    |
| <b>Test</b>                               | —      | —         | <b>0.272</b> | <b>0.521</b> | <b>0.286</b>    | <b>274.2</b>         | <b>304.25</b>        | <b>0.1016</b>          | <b>68.43</b>           | <b>0.1020</b>      | <b>0.9910</b>      | <b>131</b> | —    |
| <b>Overall</b>                            | —      | —         | <b>0.289</b> | <b>0.504</b> | <b>0.313</b>    | <b>334.2</b>         | <b>304.25</b>        | <b>0.69</b>            | <b>68.57</b>           | <b>0.0160</b>      | <b>0.9910</b>      | <b>195</b> | —    |

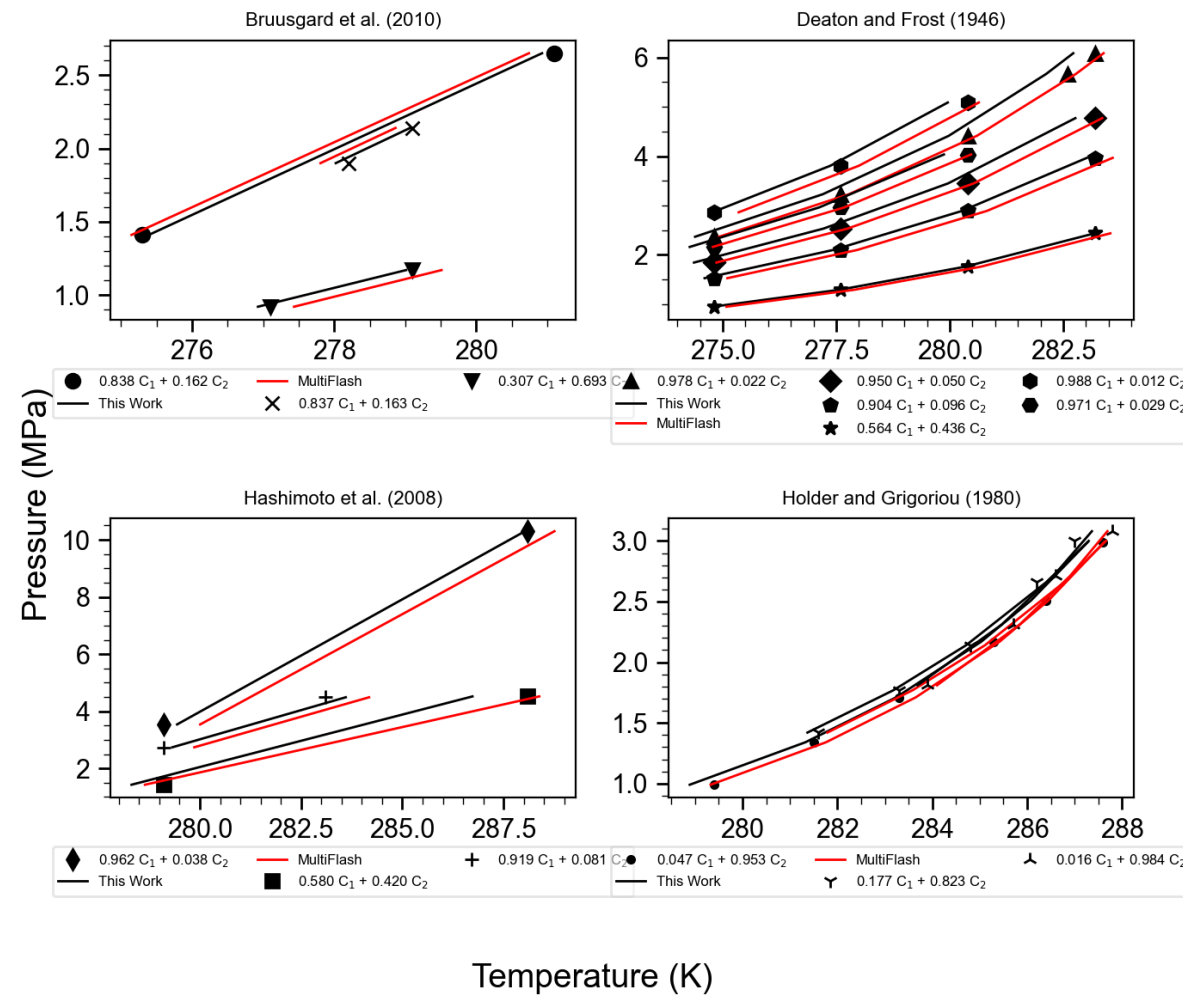

Figure S27: Selected hydrate equilibrium datasets  $\text{CH}_4 + \text{C}_2\text{H}_6$  binary-gas mixture hydrates, along with the predictions from two models: the CaSH model (black) and the MultiFlash 7.0 CPA-Hydrates (red). Datasets:<sup>16,71,72,141</sup>

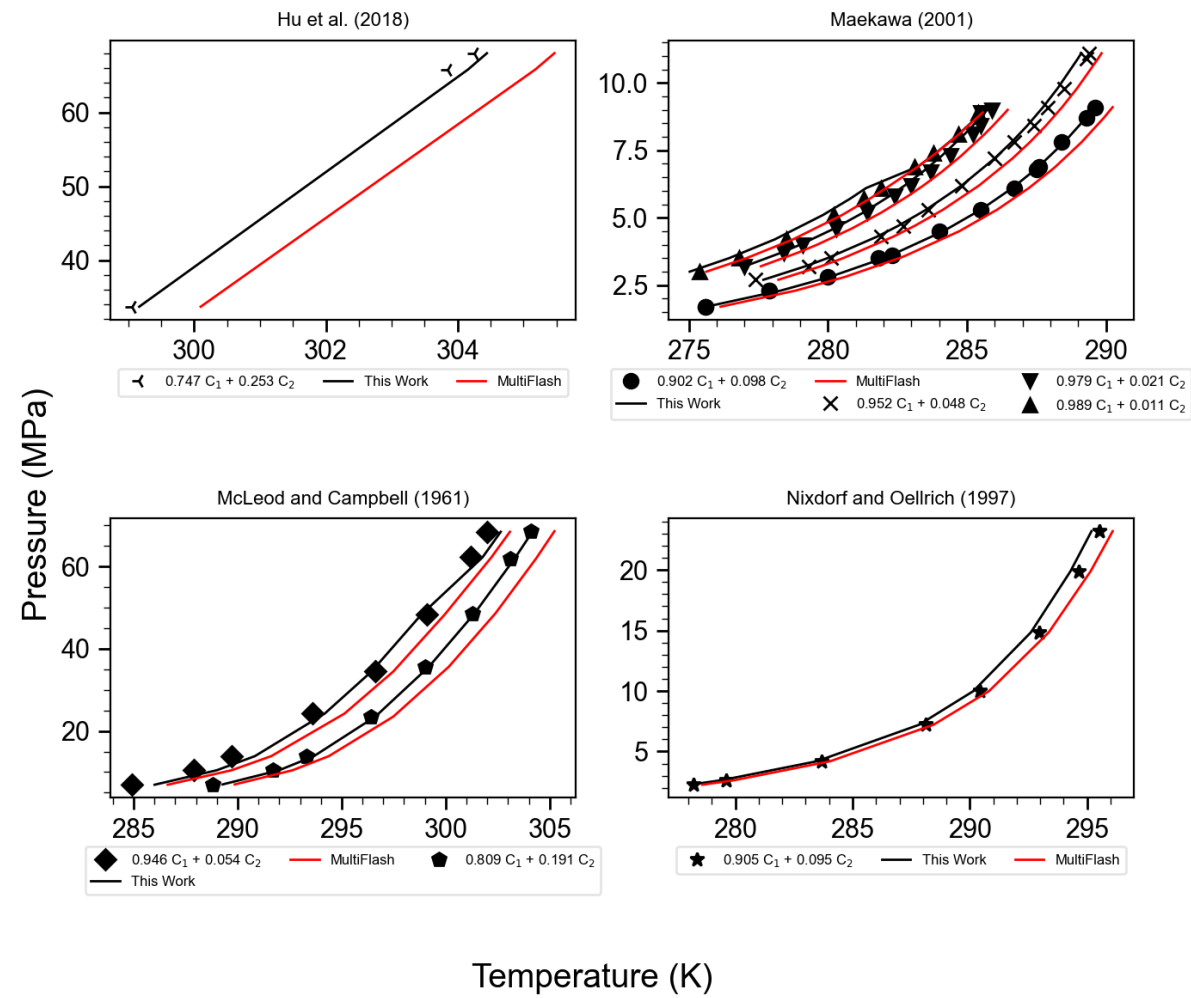

Figure S28: Selected hydrate equilibrium datasets  $\text{CH}_4 + \text{C}_2\text{H}_6$  binary-gas mixture hydrates, along with the predictions from two models: the CaSH model (black) and the MultiFlash 7.0 CPA-Hydrates (red). Datasets:<sup>37,40,46,139</sup>



### 3.2.3. C<sub>2</sub>H<sub>6</sub> + C<sub>3</sub>H<sub>8</sub> binary-gas mixture hydrate equilibria

Table S18: Database of C<sub>2</sub>H<sub>6</sub> + C<sub>3</sub>H<sub>8</sub> binary-gas mixture hydrate equilibrium data, with comparison of the AADT of the cavity-based hydrate model with CPAHYD-MF and B&S. Data types:

'Tr' = Training data; 'Te' = Test data.

| Reference                                       | Phases  | Structure | AADT<br>(K)  | MF AADT<br>(K) | CSMGem AADT<br>(K) | T <sub>min</sub><br>(K) | T <sub>max</sub><br>(K) | P <sub>min</sub><br>(MPa) | P <sub>max</sub><br>(MPa) | x <sub>1,min</sub> | x <sub>1,max</sub> | N          | Type |
|-------------------------------------------------|---------|-----------|--------------|----------------|--------------------|-------------------------|-------------------------|---------------------------|---------------------------|--------------------|--------------------|------------|------|
| Holder (1976) <sup>142</sup>                    | Lw-H-V  | II        | 0.383        | 0.251          | 0.130              | 273.43                  | 277.87                  | 0.441                     | 1.158                     | 0.2800             | 0.8570             | 36         | Te   |
|                                                 | Lw-H-V  | I         | 0.404        | 0.199          | 0.306              | 273.04                  | 283.21                  | 0.538                     | 2.027                     | 0.2800             | 0.8570             | 24         | Te   |
| Holder and Hand (1982) <sup>73</sup>            | Lw-H-V- | I         | 0.450        | 0.205          | 0.336              | 273.4                   | 285.3                   | 0.49                      | 2.03                      | 0.1680             | 0.8570             | 25         | Te   |
|                                                 | LHC     |           |              |                |                    |                         |                         |                           |                           |                    |                    |            |      |
|                                                 | Lw-H-V  | I         | 0.698        | 0.437          | 0.550              | 273.1                   | 284.5                   | 0.54                      | 7.28                      | 0.1680             | 0.8570             | 11         | Te   |
| Jager (2001) <sup>27</sup>                      | Lw-H-V  | II        | 0.397        | 0.302          | 0.118              | 273.9                   | 278.6                   | 0.44                      | 2.79                      | 0.1680             | 0.8570             | 37         | Tr   |
|                                                 | Lw-H-V  | II        | 0.135        | 0.154          | 0.239              | 276.8                   | 278.2                   | 0.55                      | 0.76                      | 0.2964             | 0.2964             | 7          | Te   |
| Mooijer-van den Heuvel<br>(2004) <sup>143</sup> | Lw-H-V  | II        | 0.380        | 0.396          | 0.075              | 277.03                  | 278.17                  | 0.54                      | 0.67                      | 0.2990             | 0.2990             | 5          | Tr   |
| Nixdorf and Oellrich (1997) <sup>46</sup>       | Lw-H-V  | I         | 0.578        | 0.150          | 0.485              | 276.66                  | 283.32                  | 0.825                     | 1.936                     | 0.8515             | 0.8515             | 6          | Te   |
| <b>Training</b>                                 | —       | —         | <b>0.395</b> | <b>0.313</b>   | <b>0.113</b>       | <b>273.9</b>            | <b>278.6</b>            | <b>0.44</b>               | <b>2.79</b>               | <b>0.1680</b>      | <b>0.8570</b>      | <b>42</b>  | —    |
| <b>Test</b>                                     | —       | —         | <b>0.430</b> | <b>0.236</b>   | <b>0.285</b>       | <b>273.04</b>           | <b>285.3</b>            | <b>0.441</b>              | <b>7.28</b>               | <b>0.1680</b>      | <b>0.8570</b>      | <b>109</b> | —    |
| <b>Overall</b>                                  | —       | —         | <b>0.420</b> | <b>0.257</b>   | <b>0.237</b>       | <b>273.04</b>           | <b>285.3</b>            | <b>0.44</b>               | <b>7.28</b>               | <b>0.1680</b>      | <b>0.8570</b>      | <b>151</b> | —    |



### 3.2.4. CH<sub>4</sub> + CO<sub>2</sub> binary-gas mixture hydrate equilibria

Table S19: Database of CH<sub>4</sub> + CO<sub>2</sub> binary-gas mixture hydrate equilibrium datam with comparison of the AADT of the cavity-based hydrate model with CPAHYD-MF and B&S. Data types: 'Tr' = Training data; 'Te' = Test data.

| Reference                                | Phases | Structure | AA DT (K) | CPAHYD-MF AADT (K) | B&S AADT (K) | T <sub>min</sub> (K) | T <sub>max</sub> (K) | P <sub>min</sub> (MPa) | P <sub>max</sub> (MPa) | x <sub>1,min</sub> | x <sub>1,max</sub> | N  | Type |
|------------------------------------------|--------|-----------|-----------|--------------------|--------------|----------------------|----------------------|------------------------|------------------------|--------------------|--------------------|----|------|
| Adisasmito et al. (1991) <sup>8</sup>    | Lw-H-V | I         | 0.148     | 0.088              | 0.164        | 273.7                | 287.6                | 1.45                   | 10.95                  | 0.1500             | 0.9200             | 42 | Tr   |
| Belandria et al. (2010) <sup>144</sup>   | Lw-H-V | I         | 0.561     | 0.631              | 0.548        | 279.1                | 289.9                | 2.96                   | 13.06                  | 0.2700             | 0.7360             | 11 | Te   |
| Belandria et al. (2011a) <sup>145</sup>  | Lw-H-V | I         | 0.346     | 0.238              | 0.360        | 273.6                | 285.5                | 1.51                   | 8.27                   | 0.0570             | 0.7940             | 49 | Te   |
| Belosludov et al. (2018) <sup>146</sup>  | Lw-H-V | I         | 3.012     | 2.942              | 2.294        | 273                  | 277                  | 1.06                   | 3.09                   | 0.3000             | 0.7000             | 6  | Te   |
| Beltran and Servio (2008) <sup>147</sup> | Lw-H-V | I         | 1.122     | 1.260              | 1.025        | 275.14               | 285.34               | 1.92                   | 7.47                   | 0.5450             | 0.8690             | 23 | Te   |
| Bruusgaard et al. (2010) <sup>138</sup>  | Lw-H-V | I         | 0.040     | 0.093              | 0.197        | 274.02               | 280.12               | 1.66                   | 4.03                   | 0.3320             | 0.7970             | 12 | Tr   |
| Chapoy et al. (2015) <sup>148</sup>      | Lw-H-V | I         | 0.455     | 0.375              | 0.308        | 276                  | 286.95               | 1.82                   | 19.97                  | 0.0590             | 0.0590             | 7  | Te   |
| Fan and Guo (1999) <sup>87</sup>         | Lw-H-V | I         | 0.842     | 0.759              | 0.760        | 273.5                | 282.3                | 1.1                    | 4.8                    | 0.0348             | 0.0348             | 9  | Tr   |
| Fan et al. (2019) <sup>149</sup>         | Lw-H-V | I         | 0.249     | 0.236              | 0.233        | 278.68               | 286.46               | 4.33                   | 10.06                  | 0.9200             | 0.9200             | 5  | Tr   |
| Hachikubo et al. (2002) <sup>23</sup>    | Lw-H-V | I         | 1.162     | 1.027              | 1.493        | 271.25               | 271.41               | 1.271                  | 2.022                  | 0.2300             | 0.7500             | 3  | Te   |
| Herri et al. (2011) <sup>150</sup>       | Lw-H-V | I         | 0.223     | 0.108              | 0.367        | 277.15               | 277.15               | 2.36                   | 3.55                   | 0.3600             | 0.8900             | 4  | Tr   |
| Kastanidis et al. (2017) <sup>151</sup>  | Lw-H-V | I         | 1.284     | 1.163              | 1.369        | 274.3                | 289.2                | 2.63                   | 12.55                  | 0.7190             | 0.7506             | 15 | Te   |
| Khan et al. (2019) <sup>152</sup>        | Lw-H-V | I         | 0.129     | 0.152              | 0.078        | 275.2                | 285                  | 1.98                   | 6.52                   | 0.5000             | 0.5000             | 4  | Tr   |
| Le Quang et al. (2016) <sup>153</sup>    | Lw-H-V | I         | 0.181     | 0.115              | 0.245        | 275.35               | 282.65               | 2.91                   | 5.63                   | 0.7750             | 0.8800             | 14 | Tr   |
| Lee et al. (2012) <sup>94</sup>          | Lw-H-V | I         | 0.107     | 0.101              | 0.235        | 274                  | 278                  | 1.53                   | 3.65                   | 0.1920             | 0.8910             | 12 | Tr   |
| Legoix et al. (2018) <sup>154</sup>      | Lw-H-V | I         | 0.345     | 0.358              | 0.133        | 280.92               | 284.97               | 3.41                   | 6.206                  | 0.1004             | 0.1004             | 3  | Tr   |
| Mu et al. (2018) <sup>43</sup>           | Lw-H-V | I         | 0.068     | 0.122              | 0.005        | 279.9                | 286.37               | 3.381                  | 7.935                  | 0.4974             | 0.4974             | 6  | Tr   |
| Obanijesu et al. (2014) <sup>155</sup>   | Lw-H-V | I         | 5.085     | 5.011              | 4.946        | 282.95               | 286.65               | 10                     | 20                     | 0.7800             | 0.7800             | 5  | Te   |
| Ohgaki et al. (1996) <sup>47</sup>       | Lw-H-V | I         | 0.076     | 0.193              | 0.038        | 280.3                | 280.3                | 3.24                   | 4.99                   | 0.3170             | 0.9350             | 29 | Te   |
| Partoon et al. (2016) <sup>156</sup>     | Lw-H-V | I         | 0.644     | 0.763              | 0.689        | 281.35               | 284.65               | 3.25                   | 5.32                   | 0.2990             | 0.2990             | 3  | Tr   |
| Sabil et al. (2014) <sup>52</sup>        | Lw-H-V | I         | 0.747     | 0.800              | 0.757        | 280.35               | 287.95               | 2.76                   | 11.28                  | 0.2751             | 0.2751             | 5  | Te   |
| Sadeq et al. (2017) <sup>53</sup>        | Lw-H-V | I         | 0.343     | 0.379              | 0.364        | 280.55               | 293.95               | 5                      | 25                     | 0.8000             | 0.9000             | 18 | Te   |
| Seo et al. (2000) <sup>106</sup>         | Lw-H-V | I         | 0.363     | 0.357              | 0.253        | 272.66               | 283.56               | 1.5                    | 5                      | 0.0959             | 0.8146             | 19 | Tr   |
| Servio et al. (1999) <sup>157</sup>      | Lw-H-V | I         | 0.374     | 0.387              | 0.416        | 273.5                | 283.1                | 1.78                   | 5.07                   | 0.4653             | 0.8756             | 17 | Tr   |
| Shi et al. (2014) <sup>158</sup>         | Lw-H-V | I         | 0.253     | 0.160              | 0.212        | 280.9                | 286.8                | 4.07                   | 8.55                   | 0.5000             | 0.5000             | 6  | Tr   |
| Sun et al. (2016) <sup>108</sup>         | Lw-H-V | I         | 0.043     | 0.064              | 0.053        | 276.15               | 278.15               | 1.772                  | 2.288                  | 0.0490             | 0.0505             | 9  | Tr   |
| Unruh and Katz (1949) <sup>110</sup>     | Lw-H-V | I         | 0.292     | 0.345              | 0.326        | 275.5                | 285.7                | 1.99                   | 7                      | 0.2900             | 0.9450             | 17 | Tr   |
| Zang and Liang (2017) <sup>159</sup>     | Lw-H-V | I         | 0.197     | 0.328              | 0.146        | 278.2                | 284.1                | 2.76                   | 5.61                   | 0.5000             | 0.5000             | 5  | Tr   |

| Reference                          | Phases | Structure | AADT (K)     | CPAHYD-MF AADT (K) | B&S AADT (K) | $T_{min}$ (K) | $T_{max}$ (K) | $P_{min}$ (MPa) | $P_{max}$ (MPa) | $x_{1,min}$   | $x_{1,max}$   | $N$        | Type |
|------------------------------------|--------|-----------|--------------|--------------------|--------------|---------------|---------------|-----------------|-----------------|---------------|---------------|------------|------|
| Zhang et al. (2016) <sup>160</sup> | Lw-H-V | I         | 0.109        | 0.078              | 0.272        | 273.7         | 276.4         | 1.45            | 3.1             | 0.2100        | 0.9100        | 6          | Tr   |
| <b>Training</b>                    | —      | —         | <b>0.238</b> | <b>0.226</b>       | <b>0.256</b> | <b>272.66</b> | <b>287.6</b>  | <b>1.1</b>      | <b>10.95</b>    | <b>0.0348</b> | <b>0.9450</b> | <b>193</b> | —    |
| <b>Test</b>                        | —      | —         | <b>0.763</b> | <b>0.760</b>       | <b>0.727</b> | <b>271.25</b> | <b>293.95</b> | <b>1.06</b>     | <b>25</b>       | <b>0.0570</b> | <b>0.9350</b> | <b>171</b> | —    |
| <b>Overall</b>                     | —      | —         | <b>0.556</b> | <b>0.477</b>       | <b>0.477</b> | <b>271.25</b> | <b>293.95</b> | <b>1.06</b>     | <b>25</b>       | <b>0.0355</b> | <b>0.9450</b> | <b>364</b> | —    |

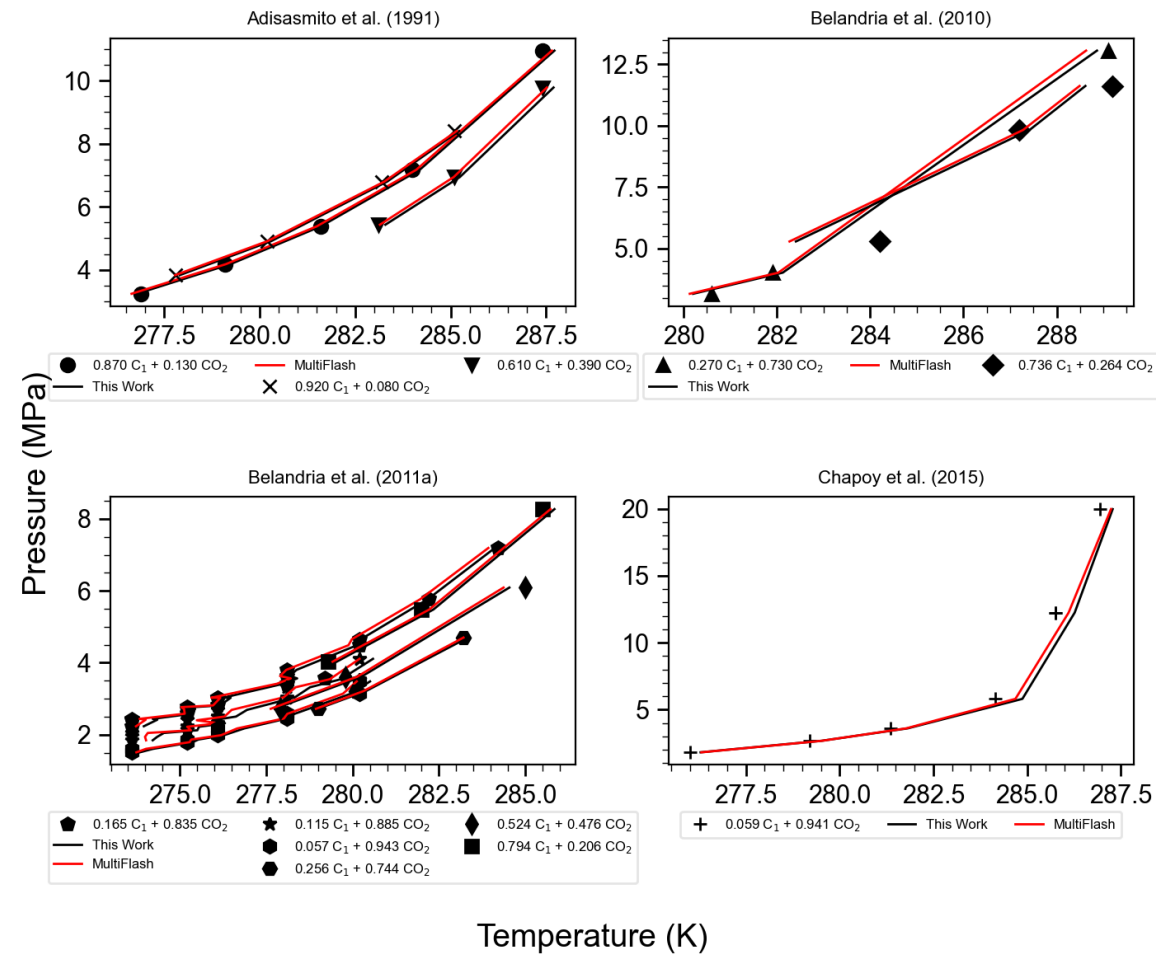

Figure S30: Selected hydrate equilibrium datasets  $\text{CH}_4 + \text{CO}_2$  binary-gas mixture hydrates, along with the predictions from two models: the CaSH model (black) and the MultiFlash 7.0 CPA-Hydrates (red). Datasets:<sup>8,144,145,148</sup>

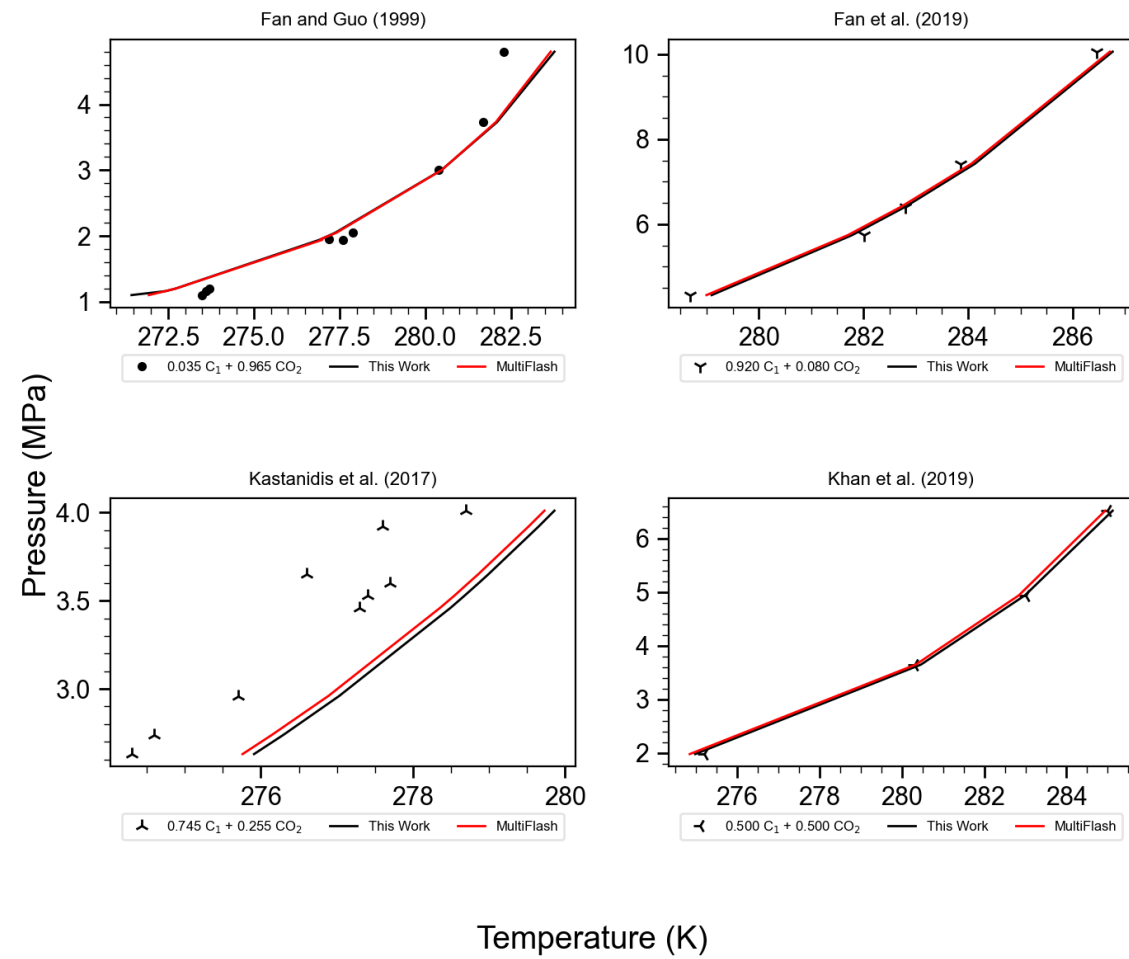

Figure S31: Selected hydrate equilibrium datasets CH<sub>4</sub> + CO<sub>2</sub> binary-gas mixture hydrates, along with the predictions from two models: the CaSH model (black) and the MultiFlash 7.0 CPA-Hydrates (red). Datasets:<sup>87,149,151,152</sup>

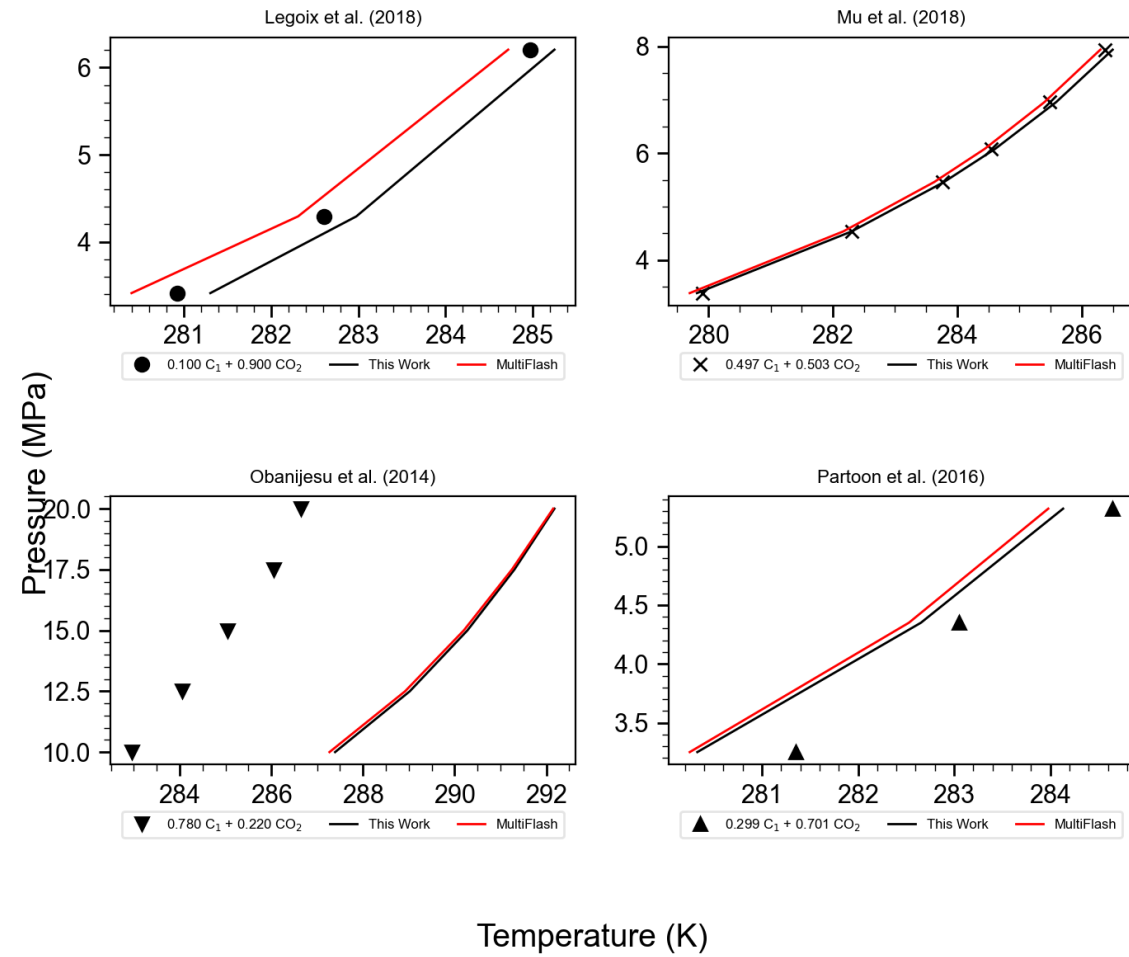

Figure S32: Selected hydrate equilibrium datasets CH<sub>4</sub> + CO<sub>2</sub> binary-gas mixture hydrates, along with the predictions from two models: the CaSH model (black) and the MultiFlash 7.0 CPA-Hydrates (red). Datasets:<sup>43,154–156</sup>

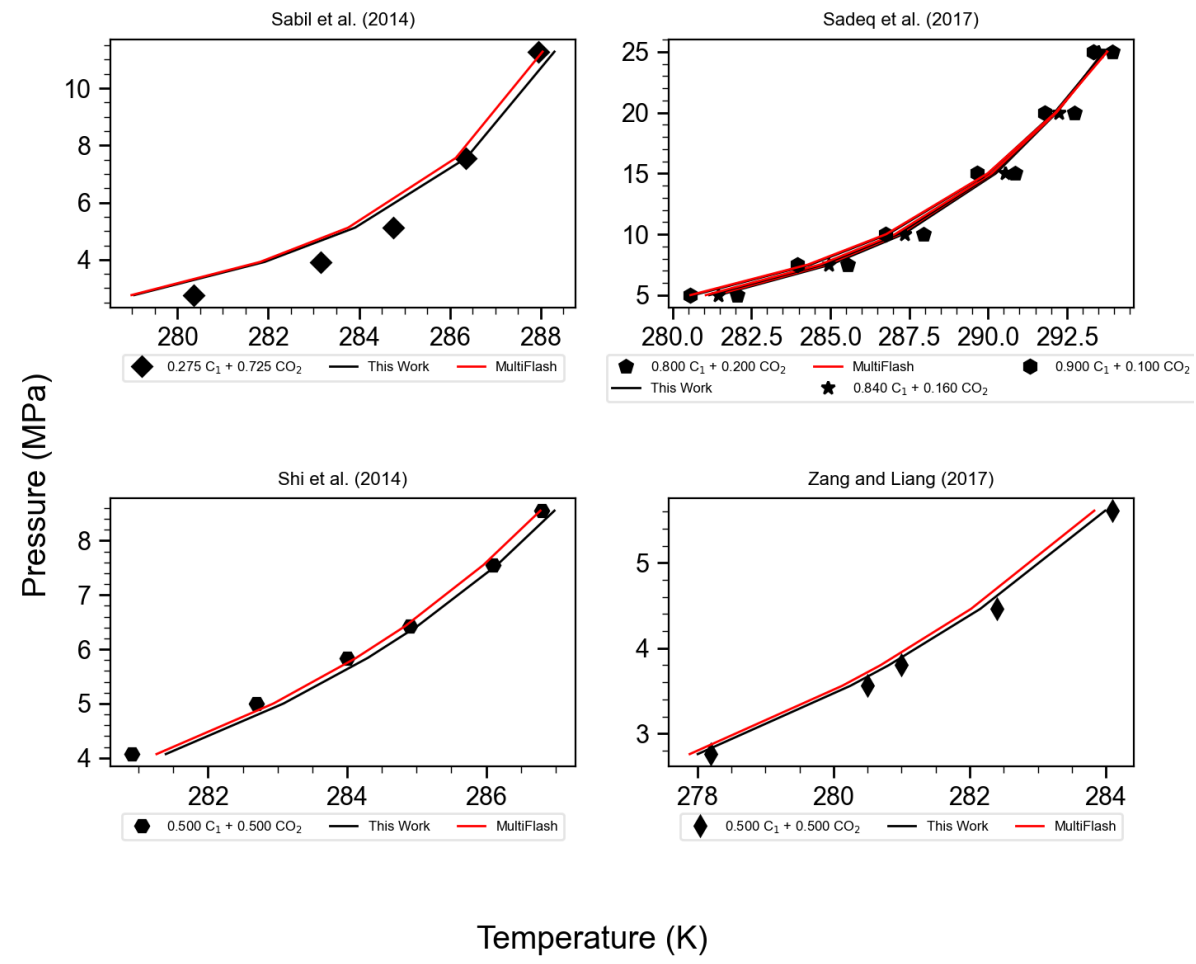

Figure S33: Selected hydrate equilibrium datasets  $\text{CH}_4 + \text{CO}_2$  binary-gas mixture hydrates, along with the predictions from two models: the CaSH model (black) and the MultiFlash 7.0 CPA-Hydrates (red). Datasets:<sup>52,53,158,159</sup>

### 3.2.5. C<sub>2</sub>H<sub>6</sub> + CO<sub>2</sub> binary-gas mixture hydrate equilibria

Table S20: Database of C<sub>2</sub>H<sub>6</sub> + CO<sub>2</sub> binary-gas mixture hydrate equilibrium data, with comparison of the AADT of the cavity-based hydrate model with CPAHYD-MF and B&S. Data types:

'Tr' = Training data; 'Te' = Test data.

| Reference                                     | Phases     | Structure | AA DT<br>(K) | CPAHYD-MF AADT<br>(K) | B&S AADT<br>(K) | T <sub>min</sub><br>(K) | T <sub>max</sub><br>(K) | P <sub>min</sub><br>(MPa) | P <sub>max</sub><br>(MPa) | x <sub>1,min</sub> | x <sub>1,max</sub> | N  | Type |
|-----------------------------------------------|------------|-----------|--------------|-----------------------|-----------------|-------------------------|-------------------------|---------------------------|---------------------------|--------------------|--------------------|----|------|
| Adisasmito and Sloan<br>(1992) <sup>161</sup> | Lw-H-<br>V | I         | 0.213        | 0.406                 | 0.409           | 273.5                   | 287.8                   | 0.5654                    | 4.0817                    | 0.0330             | 0.8110             | 40 | Te   |
| Fan and Guo (1999) <sup>87</sup>              | Lw-H-<br>V | I         | 0.456        | 0.571                 | 0.109           | 276                     | 282.7                   | 1.58                      | 3.9                       | 0.0531             | 0.0531             | 5  | Te   |
| Matsui et al. (2010) <sup>76</sup>            | Lw-H-<br>V | I         | 0.284        | 0.652                 | 0.100           | 274.15                  | 284.15                  | 0.545                     | 5.68                      | 0.0210             | 0.9560             | 54 | Te   |
| <b>Overall/Test</b>                           | —          | —         | 0.264        | 0.549                 | 0.145           | 273.5                   | 287.8                   | 0.545                     | 5.68                      | 0.0210             | 0.9560             | 99 | —    |

### 3.2.6. C<sub>3</sub>H<sub>8</sub> + CO<sub>2</sub> binary-gas mixture hydrate equilibria

Table S21: Database of C<sub>3</sub>H<sub>8</sub> + CO<sub>2</sub> binary-gas mixture hydrate equilibrium data, with comparison of the AADT of the cavity-based hydrate model with CPAHYD-MF and B&S. Data types:

'Tr' = Training data; 'Te' = Test data.

| Reference                                     | Phases     | Structure | AA DT<br>(K) | MF AADT<br>(K) | CSMGem AADT<br>(K) | T <sub>min</sub><br>(K) | T <sub>max</sub><br>(K) | P <sub>min</sub><br>(MPa) | P <sub>max</sub><br>(MPa) | x <sub>1,min</sub> | x <sub>1,max</sub> | N  | Type |
|-----------------------------------------------|------------|-----------|--------------|----------------|--------------------|-------------------------|-------------------------|---------------------------|---------------------------|--------------------|--------------------|----|------|
| Robinson and Mehta<br>(1971) <sup>102</sup>   | Lw-H-<br>V | II        | 0.598        | 0.410          | 0.713              | 273.8167                | 286.15                  | 0.30                      | 4.27                      | 0.0550             | 0.8600             | 37 | Te   |
| Adisasmito and Sloan<br>(1992) <sup>161</sup> | Lw-H-<br>V | II        | 0.489        | 0.660          | 1.262              | 273.7                   | 282                     | 0.22                      | 3.80                      | 0.0100             | 0.9010             | 41 | Tr   |



| Reference                                     | Phases     | Structure | AADT<br>(K)  | MF AADT<br>(K) | CSMGem AADT<br>(K) | $T_{min}$<br>(K) | $T_{max}$<br>(K) | $P_{min}$<br>(MPa) | $P_{max}$<br>(MPa) | $x_{1,min}$   | $x_{1,max}$   | $N$        | Type |
|-----------------------------------------------|------------|-----------|--------------|----------------|--------------------|------------------|------------------|--------------------|--------------------|---------------|---------------|------------|------|
| Adisasmito and Sloan<br>(1992) <sup>161</sup> | Lw-H-<br>V | I         | 0.447        | 0.194          | 1.505              | 273.7            | 282              | 1.36               | 3.82               | 0.0100        | 0.9010        | 14         | Te   |
| Ng and Robinson (1976) <sup>162</sup>         | Lw-H-<br>V | II        | 0.536        | 0.366          | 0.594              | 273.9278         | 281.8167         | 0.30               | 1.30               | 0.0600        | 0.8400        | 13         | Tr   |
| <b>Training</b>                               | —          | —         | <b>0.500</b> | <b>0.589</b>   | <b>1.101</b>       | <b>273.7</b>     | <b>282</b>       | <b>0.22</b>        | <b>3.80</b>        | <b>0.0100</b> | <b>0.9010</b> | <b>54</b>  | —    |
| <b>Test</b>                                   | —          | —         | <b>0.557</b> | <b>0.351</b>   | <b>0.931</b>       | <b>273.7</b>     | <b>286.15</b>    | <b>0.30</b>        | <b>4.27</b>        | <b>0.0100</b> | <b>0.9010</b> | <b>51</b>  | —    |
| <b>Overall</b>                                | —          | —         | <b>0.528</b> | <b>0.473</b>   | <b>1.018</b>       | <b>273.7</b>     | <b>286.15</b>    | <b>0.22</b>        | <b>4.27</b>        | <b>0.0100</b> | <b>0.9010</b> | <b>105</b> | —    |

### 3.2.1. CH<sub>4</sub> + N<sub>2</sub> binary-gas mixture hydrate equilibria

Table S22: Database of CH<sub>4</sub> + N<sub>2</sub> binary-gas mixture hydrate equilibrium data, with comparison of the AADT of the cavity-based hydrate model with CPAHYD-MF and B&S. Data types: 'Tr' = Training data; 'Te' = Test data.

| Reference                                 | Phases | Structure | AADT (K)     | CPAHYD-MF AADT (K) | B&S AADT (K) | $T_{min}$ (K) | $T_{max}$ (K) | $P_{min}$ (MPa) | $P_{max}$ (MPa) | $x_{1,min}$   | $x_{1,max}$   | $N$        | Type |
|-------------------------------------------|--------|-----------|--------------|--------------------|--------------|---------------|---------------|-----------------|-----------------|---------------|---------------|------------|------|
| Jhaveri and Robinson (1965) <sup>30</sup> | Lw-H-V | I         | 0.764        | 0.975              | 1.102        | 273.2         | 295.2         | 3.9             | 35.96           | 0.1270        | 0.8920        | 44         | Te   |
| Lee et al. (2006) <sup>163</sup>          | Lw-H-V | I         | 0.684        | 0.873              | 0.931        | 273.3         | 285.05        | 7.1             | 20.7            | 0.5961        | 0.7476        | 16         | Tr   |
| Lee et al. (2006) <sup>163</sup>          | Lw-H-V | II        | 1.282        | 0.713              | 0.675        | 273.3         | 281           | 8.625           | 17.45           | 0.5961        | 0.7476        | 4          | Te   |
| Mei et al. (1996) <sup>164</sup>          | Lw-H-V | I         | 0.141        | 0.153              | 0.133        | 273.7         | 285.3         | 2.99            | 10.1            | 0.1074        | 0.1074        | 8          | Tr   |
| Nixdorf and Oellrich (1997) <sup>46</sup> | Lw-H-V | I         | 0.109        | 0.160              | 0.206        | 278.7         | 292.44        | 4.938           | 24.428          | 0.1074        | 0.1074        | 6          | Tr   |
| Sadeq et al. (2017) <sup>53</sup>         | Lw-H-V | I         | 0.485        | 0.589              | 0.632        | 276.75        | 292.75        | 5               | 25              | 0.1000        | 0.3600        | 23         | Tr   |
| <b>Training</b>                           | —      | —         | <b>0.451</b> | <b>0.560</b>       | <b>0.599</b> | <b>273.3</b>  | <b>292.75</b> | <b>2.99</b>     | <b>25.00</b>    | <b>0.1000</b> | <b>0.7476</b> | <b>53</b>  | —    |
| <b>Test</b>                               | —      | —         | <b>0.807</b> | <b>0.953</b>       | <b>1.067</b> | <b>273.2</b>  | <b>295.2</b>  | <b>3.90</b>     | <b>35.96</b>    | <b>0.1270</b> | <b>0.8920</b> | <b>48</b>  | —    |
| <b>Overall</b>                            | —      | —         | <b>0.620</b> | <b>0.747</b>       | <b>0.821</b> | <b>273.2</b>  | <b>295.2</b>  | <b>2.99</b>     | <b>35.96</b>    | <b>0.1000</b> | <b>0.8920</b> | <b>101</b> | —    |

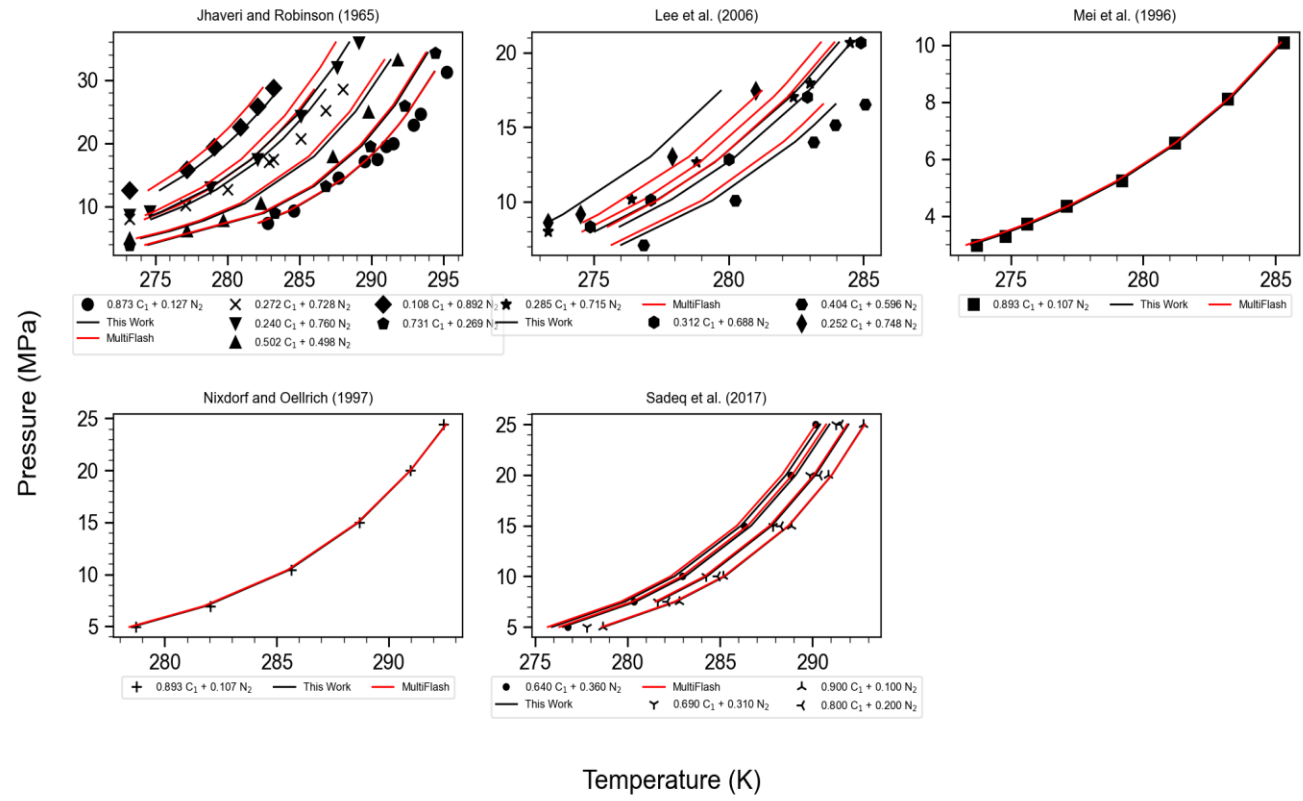

Figure S34: Selected hydrate equilibrium datasets  $\text{CH}_4 + \text{N}_2$  binary-gas mixture hydrates, along with the predictions from two models: the CaSH model (black) and the MultiFlash 7.0 CPA-Hydrates (red). Datasets:<sup>30,46,53,163,164</sup>

### 3.2.2. $C_3H_8 + N_2$ binary-gas mixture hydrate equilibria

Table S23: Database of  $C_3H_8 + N_2$  binary-gas mixture hydrate equilibrium data, with comparison of the AADT of the cavity-based hydrate model with CPAHYD-MF and B&S. Data types: 'Tr' = Training data; 'Te' = Test data.

| Reference                       | Phases     | Structure | AADT (K)     | MF AADT (K)  | CSMGem AADT (K) | $T_{min}$ (K) | $T_{max}$ (K) | $P_{min}$ (MPa) | $P_{max}$ (MPa) | $x_{1,min}$   | $x_{1,max}$   | $N$       | Type |
|---------------------------------|------------|-----------|--------------|--------------|-----------------|---------------|---------------|-----------------|-----------------|---------------|---------------|-----------|------|
| Ng et al. (1977) <sup>165</sup> | Lw-H-LHC-V | II        | 0.351        | 0.118        | 0.226           | 278.98        | 293.8         | 0.76            | 16.99           | 0.0100        | 0.9906        | 16        | Te   |
|                                 | Lw-H-LHC   | II        | 0.302        | 0.104        | 0.301           | 280.13        | 291.3         | 1.98            | 15.31           | 0.0100        | 0.9906        | 21        | Te   |
|                                 | Lw-H-V     | II        | 0.394        | 0.334        | 0.469           | 274.16        | 289.17        | 0.256           | 18.09           | 0.0100        | 0.9906        | 29        | Tr   |
| <b>Training</b>                 | —          | —         | <b>0.394</b> | <b>0.334</b> | <b>0.469</b>    | <b>274.16</b> | <b>289.17</b> | <b>0.26</b>     | <b>18.09</b>    | <b>0.0100</b> | <b>0.9906</b> | <b>29</b> | —    |
| <b>Test</b>                     | —          | —         | <b>0.323</b> | <b>0.110</b> | <b>0.269</b>    | <b>278.98</b> | <b>293.8</b>  | <b>0.76</b>     | <b>16.99</b>    | <b>0.0100</b> | <b>0.9906</b> | <b>37</b> | —    |
| <b>Overall</b>                  | —          | —         | <b>0.354</b> | <b>0.208</b> | <b>0.357</b>    | <b>274.16</b> | <b>293.8</b>  | <b>0.256</b>    | <b>18.09</b>    | <b>0.0100</b> | <b>0.9906</b> | <b>66</b> | —    |

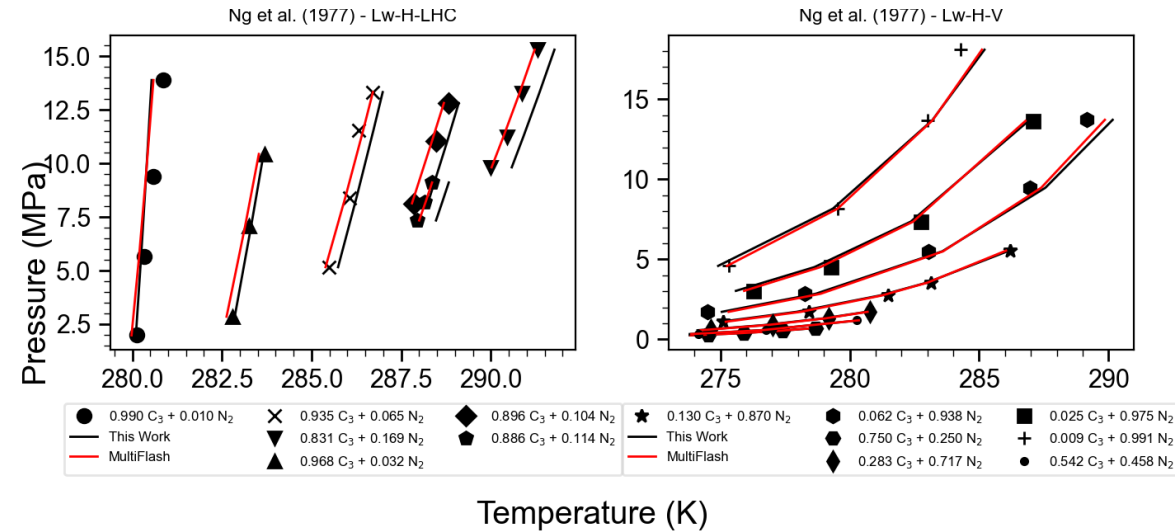

Figure S35: Selected hydrate equilibrium datasets  $C_3H_8 + N_2$  binary-gas mixture hydrates, along with the predictions from two models: the CaSH model (black) and the MultiFlash 7.0 CPA-Hydrates (red). Datasets:<sup>165</sup>

### 3.2.3. N<sub>2</sub> + CO<sub>2</sub> binary-gas mixture hydrate equilibria

Table S24: Database of N<sub>2</sub> + CO<sub>2</sub> binary-gas mixture hydrate equilibrium data, with comparison of the AADT of the cavity-based hydrate model with CPAHYD-MF and B&S. Data types: 'Tr' = Training data; 'Te' = Test data.

| Reference                                  | Phases     | Structure | AADT (K)     | CPAHYD-MF AADT (K) | B&S AADT (K) | T <sub>min</sub> (K) | T <sub>max</sub> (K) | P <sub>min</sub> (MPa) | P <sub>max</sub> (MPa) | x <sub>1,min</sub> | x <sub>1,max</sub> | N          | Type |
|--------------------------------------------|------------|-----------|--------------|--------------------|--------------|----------------------|----------------------|------------------------|------------------------|--------------------|--------------------|------------|------|
| Belandria et al. (2011) <sup>166</sup>     | Lw-H-V     | I         | 2.380        | 1.874              | 1.912        | 273.6                | 281.7                | 2.032                  | 17.628                 | 0.0695             | 0.5842             | 35         | Te   |
| Belandria et al. (2012) <sup>167</sup>     | Lw-H-V     | I         | 1.598        | 1.208              | 1.208        | 275.1                | 278.9                | 2.35                   | 16.74                  | 0.2510             | 0.8490             | 14         | Te   |
| Bruusgaard et al. (2008) <sup>141</sup>    | Lw-H-V     | I         | 0.221        | 0.287              | 0.243        | 275.2                | 283.1                | 2                      | 22.4                   | 0.2130             | 0.8380             | 24         | Te   |
| Chapoy et al. (2015) <sup>148</sup>        | Lw-H-V     | I         | 0.191        | 0.202              | 0.128        | 276.91               | 288.55               | 2.05                   | 55.11                  | 0.0460             | 0.0460             | 6          | Te   |
| Fan and Guo (1999) <sup>87</sup>           | Lw-H-V     | I         | 0.367        | 0.371              | 0.313        | 273.1                | 280.2                | 1.22                   | 3.09                   | 0.0348             | 0.0901             | 9          | Te   |
| Herri et al. (2011) <sup>150</sup>         | Lw-H-V     | I         | 0.691        | 2.809              | 0.862        | 273.4                | 281.1                | 5.3                    | 6.6                    | 0.4200             | 0.8400             | 16         | Te   |
| Jarrahian and Nakhaee (2019) <sup>91</sup> | Lw-H-V     | I         | 1.919        | 1.083              | 1.086        | 274.15               | 280.15               | 5.87                   | 29.01                  | 0.7500             | 0.9500             | 35         | Te   |
| Kang et al. (2001) <sup>168</sup>          | Lw-H-V     | I         | 0.933        | 0.725              | 0.866        | 272.85               | 284.25               | 1.565                  | 20.753                 | 0.0341             | 0.9502             | 35         | Te   |
| Kang et al. (2001) <sup>168</sup>          | Lw-H-V     | II        | 2.938        | 1.902              | 1.838        | 273.95               | 280                  | 11.02                  | 26.69                  | 0.0341             | 0.9502             | 13         | Tr   |
| Kim et al. (2011) <sup>169</sup>           | Lw-H-V     | I         | 1.978        | 0.444              | 0.402        | 276.88               | 285.41               | 5                      | 20                     | 0.0027             | 0.0540             | 16         | Te   |
| Kim et al. (2011) <sup>169</sup>           | Lw-H-V-LHC | I         | 0.489        | 0.226              | 0.076        | 283.33               | 284.29               | 5.5                    | 10                     | 0.0027             | 0.0540             | 17         | Te   |
| Lee et al. (2014) <sup>120</sup>           | Lw-H-V     | I         | 1.476        | 1.639              | 0.591        | 275                  | 281.1                | 8.23                   | 24.51                  | 0.8000             | 0.9000             | 17         | Te   |
| Olsen et al. (1999) <sup>170</sup>         | Lw-H-V     | I         | 0.273        | 0.184              | 0.142        | 273.4                | 281.9                | 1.986                  | 9.55                   | 0.2811             | 0.8380             | 15         | Te   |
| Rho et al. (2018) <sup>171</sup>           | Lw-H-V     | I         | 0.384        | 0.377              | 0.149        | 277.82               | 280.52               | 2.5                    | 3.5                    | 0.0229             | 0.0229             | 3          | Te   |
| Sadeq et al. (2017) <sup>53</sup>          | Lw-H-V     | I         | 0.608        | 0.757              | 0.695        | 275.75               | 284.45               | 5                      | 20                     | 0.6400             | 0.7400             | 10         | Te   |
| Sun et al. (2015) <sup>172</sup>           | Lw-H-V     | I         | 2.375        | 1.711              | 1.783        | 273.4                | 278.4                | 5.28                   | 17.53                  | 0.7490             | 0.8990             | 17         | Te   |
| <b>Training</b>                            | —          | —         | <b>2.938</b> | <b>1.902</b>       | <b>1.838</b> | <b>273.95</b>        | <b>280</b>           | <b>11.02</b>           | <b>26.69</b>           | <b>0.0341</b>      | <b>0.9502</b>      | <b>13</b>  | —    |
| <b>Test</b>                                | —          | —         | <b>1.275</b> | <b>1.047</b>       | <b>0.866</b> | <b>272.85</b>        | <b>288.55</b>        | <b>1.22</b>            | <b>55.11</b>           | <b>0.0027</b>      | <b>0.9502</b>      | <b>269</b> | —    |
| <b>Overall</b>                             | —          | —         | <b>1.368</b> | <b>1.086</b>       | <b>0.911</b> | <b>272.85</b>        | <b>288.55</b>        | <b>1.22</b>            | <b>55.11</b>           | <b>0.0027</b>      | <b>0.9502</b>      | <b>282</b> | —    |

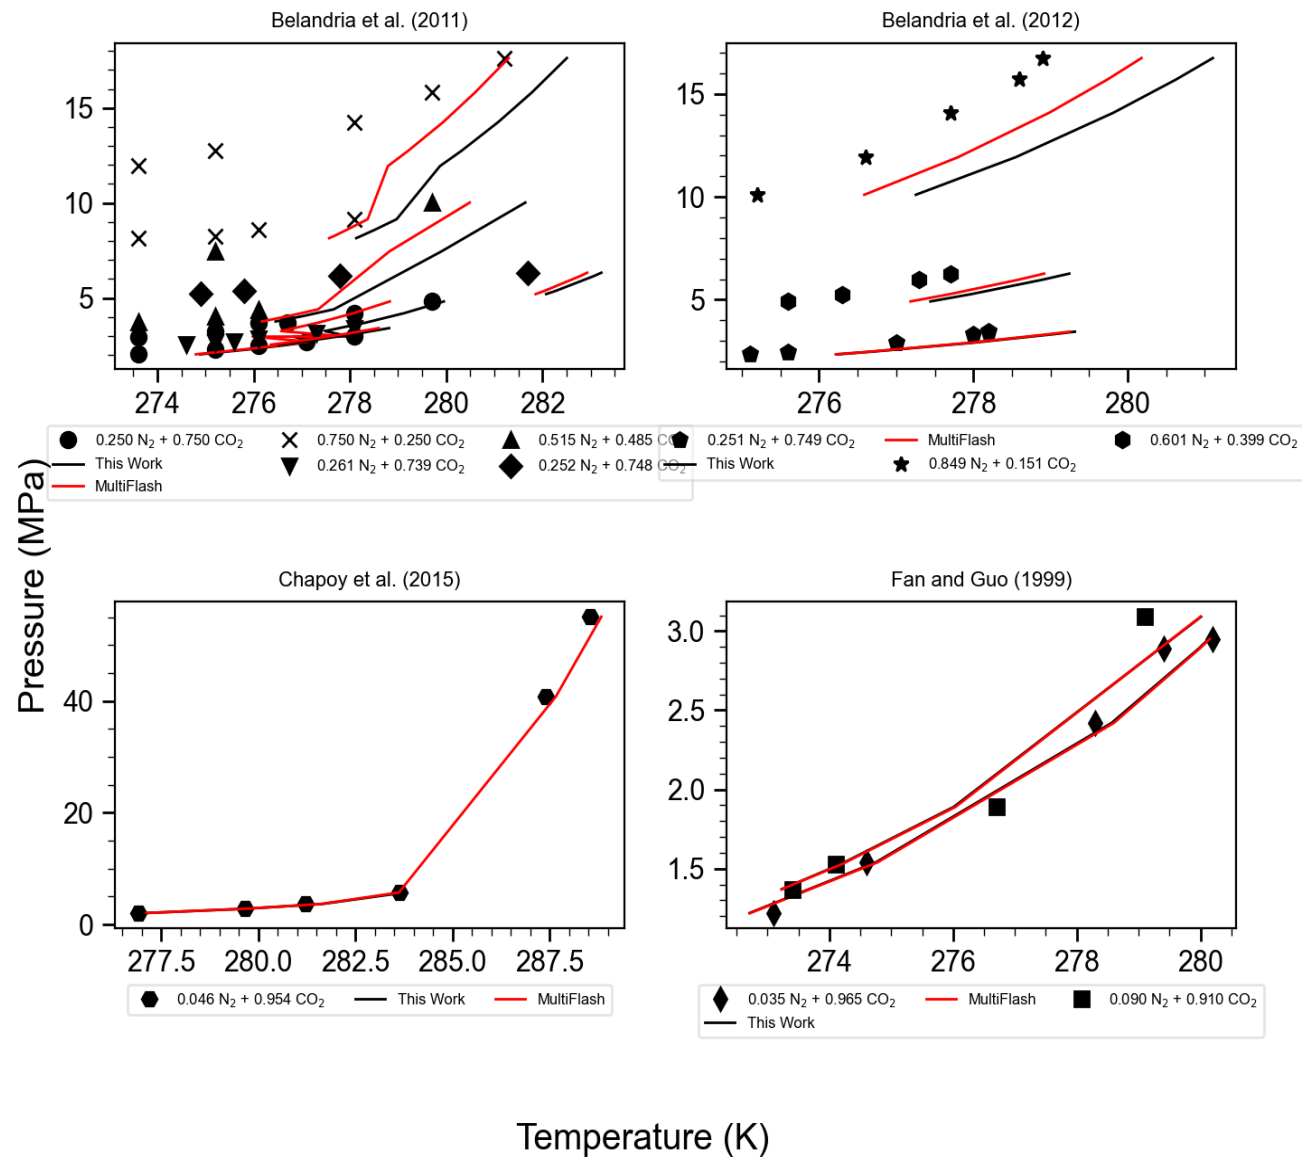

Figure S36: Selected hydrate equilibrium datasets  $N_2 + CO_2$  binary-gas mixture hydrates, along with the predictions from two models: the CaSH model (black) and the MultiFlash 7.0 CPA-Hydrates (red). Datasets:<sup>87,148,166,167</sup>. Note for Belandria et al. (2011)<sup>166</sup> and Bellandria et al.<sup>167</sup>, the composition of  $N_2 + CO_2$  is normalised against itself (the gas-phase); the reader should refer to the source for the original composition.

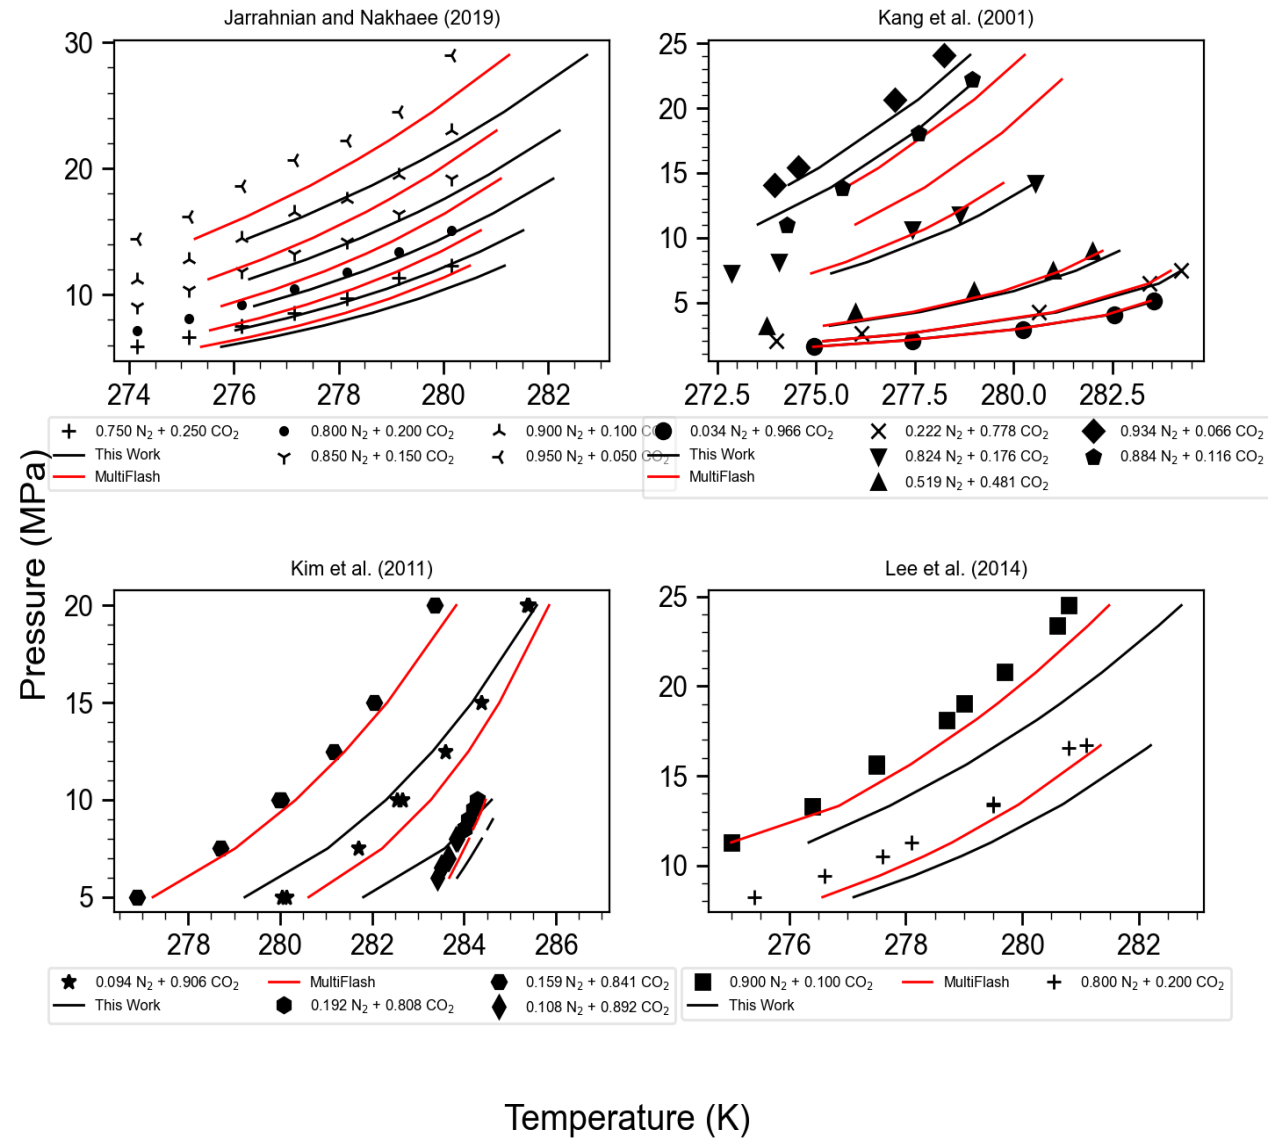

Figure S37: Selected hydrate equilibrium datasets  $N_2 + CO_2$  binary-gas mixture hydrates, along with the predictions from two models: the CaSH model (black) and the MultiFlash 7.0 CPA-Hydrates (red). Datasets:<sup>91,120,168,169</sup>. Note for Kim et al. (2011)<sup>169</sup> the composition of  $N_2 + CO_2$  is normalised against itself (the gas-phase); the reader should refer to the source for the original composition.

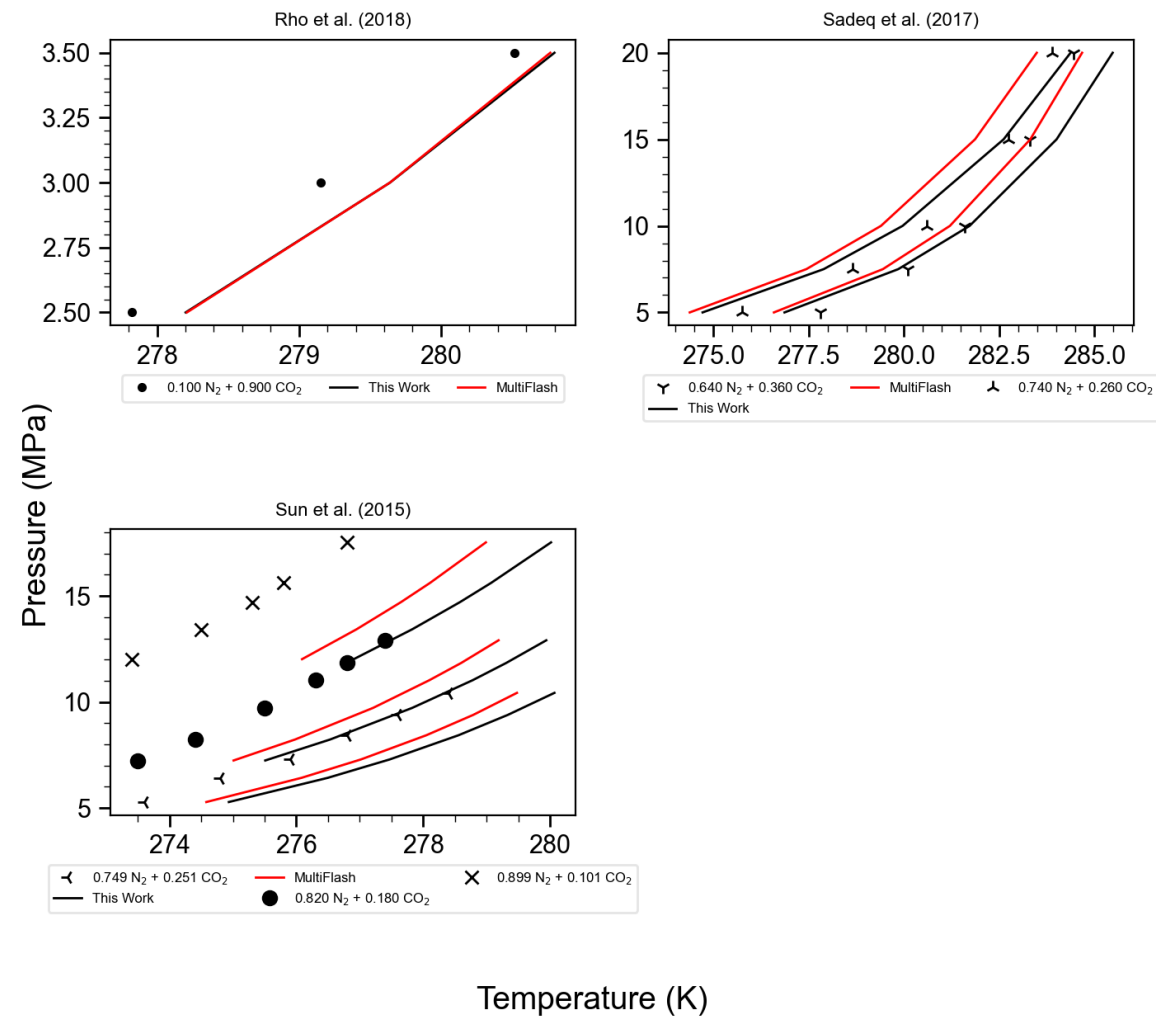

Figure S38: Selected hydrate equilibrium datasets  $N_2 + CO_2$  binary-gas mixture hydrates, along with the predictions from two models: the CaSH model (black) and the MultiFlash 7.0 CPA-Hydrates (red). Datasets:<sup>53,171,172</sup>

### 3.2.4. CH<sub>4</sub> + H<sub>2</sub>S binary-gas mixture hydrate equilibria

Table S25: Database of CH<sub>4</sub> + H<sub>2</sub>S binary-gas mixture hydrate equilibrium data, with comparison of the AADT of the cavity-based hydrate model with CPAHYD-MF and B&S. Data types: 'Tr' = Training data; 'Te' = Test data.

| Reference                                  | Phases     | Structure | AADT<br>(K)  | MF AADT<br>(K) | CSMGem AADT<br>(K) | T <sub>min</sub><br>(K) | T <sub>max</sub><br>(K) | P <sub>min</sub><br>(MPa) | P <sub>max</sub><br>(MPa) | x <sub>1,min</sub> | x <sub>1,max</sub> | N         | Type |
|--------------------------------------------|------------|-----------|--------------|----------------|--------------------|-------------------------|-------------------------|---------------------------|---------------------------|--------------------|--------------------|-----------|------|
| Noaker and Katz (1954) <sup>173</sup>      | Lw-H-<br>V | I         | 0.614        | 0.674          | 0.763              | 276.5                   | 295.4                   | 1.03                      | 6.79                      | 0.7800             | 0.9900             | 20        | Tr   |
| Mohammadi and Richon (2015) <sup>174</sup> | Lw-H-<br>V | I         | 0.825        | 1.025          | 1.399              | 273.9                   | 279.6                   | 0.92                      | 1.94                      | 0.8960             | 0.9560             | 5         | Te   |
| Ward et al. (2015a) <sup>175</sup>         | Lw-H-<br>V | I         | 0.202        | 0.218          | 0.206              | 283.31                  | 293.22                  | 2                         | 6.87                      | 0.8833             | 0.8985             | 6         | Te   |
| <b>Training</b>                            | —          | —         | <b>0.614</b> | <b>0.674</b>   | <b>0.763</b>       | <b>276.5</b>            | <b>295.4</b>            | <b>1.03</b>               | <b>6.79</b>               | <b>0.7800</b>      | <b>0.9900</b>      | <b>20</b> | —    |
| <b>Test</b>                                | —          | —         | <b>0.486</b> | <b>0.585</b>   | <b>0.748</b>       | <b>273.9</b>            | <b>293.22</b>           | <b>0.92</b>               | <b>6.87</b>               | <b>0.8833</b>      | <b>0.9560</b>      | <b>11</b> | —    |
| <b>Overall</b>                             | —          | —         | <b>0.569</b> | <b>0.642</b>   | <b>0.758</b>       | <b>273.9</b>            | <b>295.4</b>            | <b>0.92</b>               | <b>6.87</b>               | <b>0.7800</b>      | <b>0.9900</b>      | <b>31</b> | —    |



### 3.2.5. CH<sub>4</sub> + n-C<sub>4</sub>H<sub>10</sub> binary-gas mixture hydrate equilibria

Table S26: Database of CH<sub>4</sub> + n-C<sub>4</sub>H<sub>10</sub> binary-gas mixture hydrate equilibrium data, with comparison of the AADT of the cavity-based hydrate model with CPAHYD-MF and B&S. Data types: 'Tr' = Training data; 'Te' = Test data. In the Phases column, the \* denotes that no compositional data was available for these points, and an equimolar gas composition was assumed.

| Reference                                | Phases      | Structure | AADT (K)     | MF AADT (K)  | CSMGem AADT (K) | T <sub>min</sub> (K) | T <sub>max</sub> (K) | P <sub>min</sub> (MPa) | P <sub>max</sub> (MPa) | x <sub>1,min</sub> | x <sub>1,max</sub> | N          | Type |
|------------------------------------------|-------------|-----------|--------------|--------------|-----------------|----------------------|----------------------|------------------------|------------------------|--------------------|--------------------|------------|------|
| Ng and Robinson (1976a) <sup>176</sup>   | Lw-H-V      | II        | 0.765        | 0.448        | 0.235           | 276                  | 287.55               | 2.05                   | 11.05                  | 0.9418             | 0.9836             | 16         | Tr   |
|                                          | Lw-H-V      | I         | 0.168        | 0.173        | 0.063           | 287.4                | 288.5                | 12.06                  | 13.72                  | 0.9418             | 0.9836             | 2          | Te   |
| Ng and Robinson (1977) <sup>165</sup>    | Lw-H-V-LHC  | II        | 0.690        | 0.280        | 0.111           | 275                  | 287.4                | 1.24                   | 8.83                   | 0.0870             | 0.5010             | 5          | Tr   |
|                                          | Lw-H-LHC    | II        | 0.654        | 1.081        | 1.013           | 275.6                | 288.5                | 2.96                   | 13.82                  | 0.0870             | 0.5010             | 24         | Tr   |
| Deaton and Frost (1946) <sup>16</sup>    | Lw-H-V      | II        | 0.286        | 0.285        | 0.567           | 274.8                | 280.4                | 2.048                  | 4.075                  | 0.9740             | 0.9920             | 6          | Te   |
| McLeod and Campbell (1961) <sup>40</sup> | Lw-H-V      | II        | 0.138        | 0.521        | 0.198           | 282.5                | 290.3                | 5.76                   | 17.96                  | 0.9470             | 0.9740             | 11         | Te   |
|                                          | Lw-H-V      | I         | 0.169        | 0.411        | 0.140           | 292.4                | 301.1                | 23.89                  | 68.43                  | 0.9470             | 0.9740             | 7          | Te   |
| John and Holder (1982a) <sup>177</sup>   | I-H-V       | II        | 0.937        | 1.555        | 1.020           | 251.2                | 273.1                | 0.391                  | 2.611                  | 0.5000             | 0.9960             | 44         | Tr   |
|                                          | I-H-V-LHC   | II        | 0.870        | 1.780        | 0.673           | 251.2                | 273.1                | 0.336                  | 1.011                  | 0.5000             | 0.9960             | 5          | Tr   |
|                                          | I-H-V-LHC*  | II        | 0.367        | 1.090        | 0.810           | 255.3                | 272.5                | 0.4171                 | 0.979                  | 0.5000             | 0.9960             | 19         | Te   |
|                                          | Lw-H-V-LHC* | II        | 0.300        | 0.073        | 0.541           | 273.3                | 276.8                | 1.046                  | 1.722                  | 0.5000             | 0.9960             | 6          | Te   |
| Paranjpe et al. (1987) <sup>136</sup>    | Lw-H-V-LHC  | II        | 1.998        | 1.847        | 1.366           | 268.2                | 281.2                | 0.784                  | 3.441                  | 0.8900             | 0.9850             | 3          | Te   |
| Smith et al. (2017) <sup>137</sup>       | Lw-H-V      | II        | 0.420        | 0.446        | 0.440           | 275.35               | 288.05               | 2.75                   | 12.53                  | 0.9450             | 0.9948             | 12         | Te   |
|                                          | Lw-H-V      | I         | 0.283        | 0.263        | 0.264           | 281.65               | 290.55               | 6.26                   | 16.01                  | 0.9450             | 0.9948             | 6          | Te   |
| <b>Training</b>                          | —           | —         | <b>0.819</b> | <b>1.190</b> | <b>0.818</b>    | <b>251.2</b>         | <b>288.5</b>         | <b>0.34</b>            | <b>13.82</b>           | <b>0.0870</b>      | <b>0.9960</b>      | <b>94</b>  | —    |
| <b>Test</b>                              | —           | —         | <b>0.365</b> | <b>0.615</b> | <b>0.504</b>    | <b>255.3</b>         | <b>301.1</b>         | <b>0.42</b>            | <b>68.43</b>           | <b>0.5000</b>      | <b>0.9960</b>      | <b>72</b>  | —    |
| <b>Overall</b>                           | —           | —         | <b>0.622</b> | <b>0.940</b> | <b>0.849</b>    | <b>251.2</b>         | <b>301.1</b>         | <b>0.336</b>           | <b>68.43</b>           | <b>0.0870</b>      | <b>0.9960</b>      | <b>166</b> | —    |

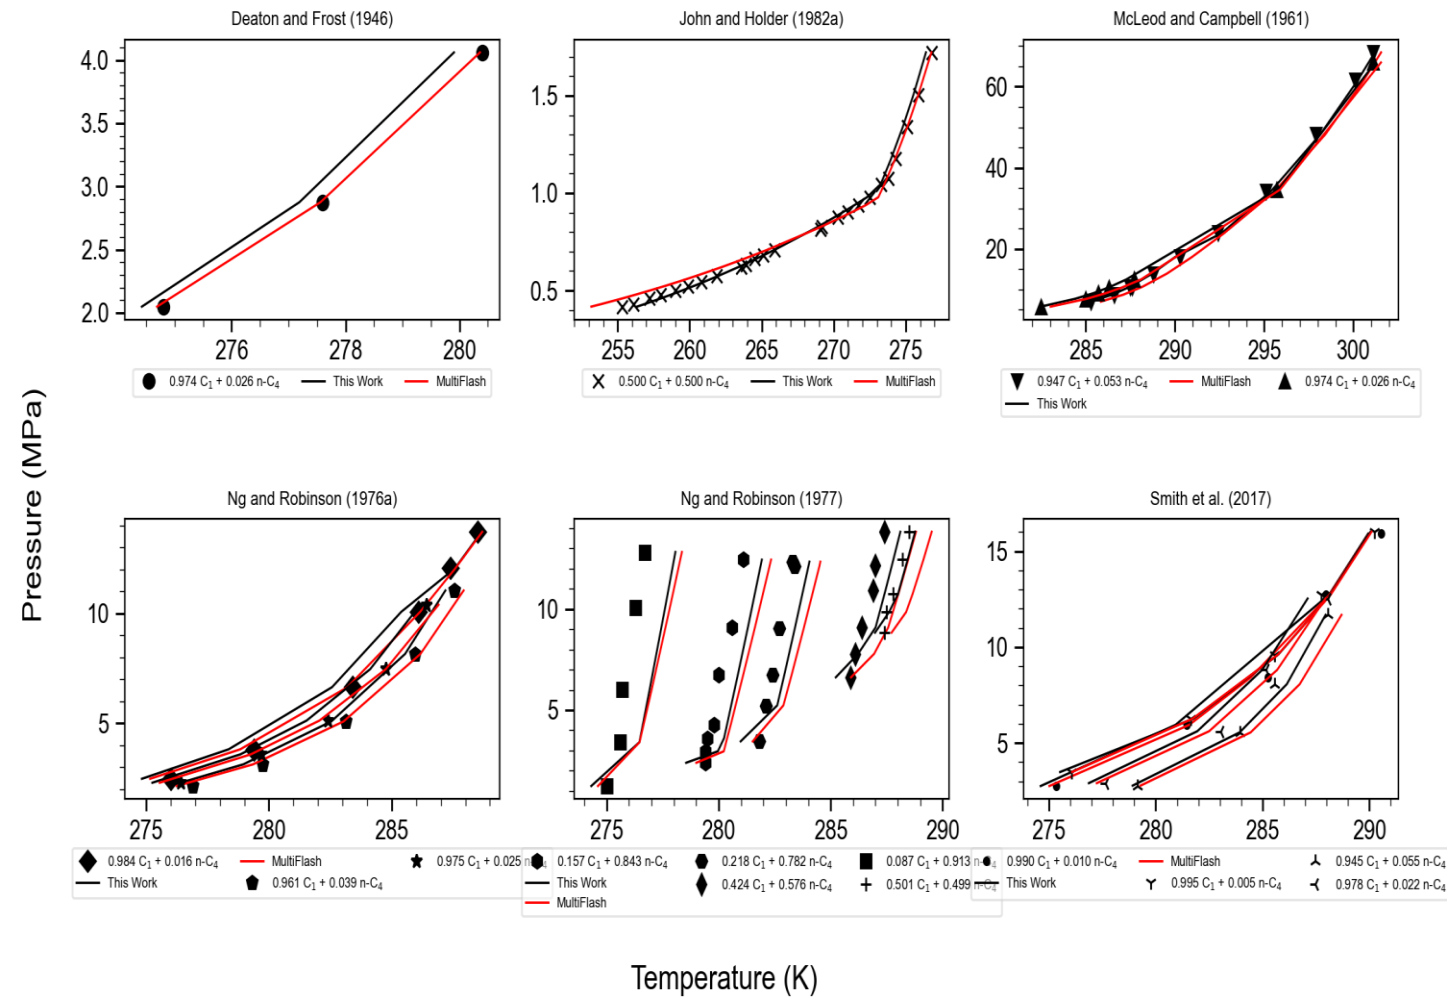

Figure S39: Selected hydrate equilibrium datasets  $\text{CH}_4 + n\text{-C}_4\text{H}_{10}$  binary-gas mixture hydrates, along with the predictions from two models: the CaSH model (black) and the MultiFlash 7.0 CPA-Hydrates (red). Datasets:<sup>16,40,137,165,176,177</sup>

### 3.2.6. CH<sub>4</sub> + i-C<sub>4</sub>H<sub>10</sub> binary-gas mixture hydrate equilibria

Table S27: Database of CH<sub>4</sub> + i-C<sub>4</sub>H<sub>10</sub> binary-gas mixture hydrate equilibrium data, with comparison of the AADT of the cavity-based hydrate model with CPAHYD-MF and B&S. Data types:

'Tr' = Training data; 'Te' = Test data.

| Reference                                   | Phases         | Structure | AA DT<br>(K) | MF AADT<br>(K) | CSMGem AADT<br>(K) | T <sub>min</sub><br>(K) | T <sub>max</sub><br>(K) | P <sub>min</sub><br>(MPa) | P <sub>max</sub><br>(MPa) | x <sub>1,min</sub> | x <sub>1,max</sub> | N          | Type |
|---------------------------------------------|----------------|-----------|--------------|----------------|--------------------|-------------------------|-------------------------|---------------------------|---------------------------|--------------------|--------------------|------------|------|
| Deaton and Frost (1946) <sup>16</sup>       | Lw-H-V         | II        | 0.193        | 0.037          | 1.166              | 274.8                   | 277.6                   | 1.324                     | 1.841                     | 0.9890             | 0.9890             | 2          | Te   |
| McLeod and Campbell<br>(1961) <sup>40</sup> | Lw-H-V         | II        | 1.329        | 0.761          | 0.616              | 288.6                   | 305                     | 6.72                      | 63.33                     | 0.9540             | 0.9860             | 20         | Te   |
| Ng and Robinson (1976) <sup>162</sup>       | Lw-H-LHC       | II        | 1.571        | 1.576          | 0.642              | 273.8                   | 293.6                   | 0.159                     | 10.07                     | 0.3490             | 0.9977             | 46         | Te   |
| Paranjpe et al. (1987) <sup>136</sup>       | Lw-H-V-<br>LHC | II        | 1.582        | 1.383          | 0.778              | 277                     | 298.6                   | 0.254                     | 11.57                     | 0.3490             | 0.9977             | 13         | Te   |
| Smith et al. (2017) <sup>137</sup>          | Lw-H-V         | II        | 0.659        | 0.616          | 0.533              | 275.4                   | 299.3                   | 0.179                     | 14.548                    | 0.0010             | 0.6470             | 38         | Te   |
| Thakore and Holder<br>(1987) <sup>59</sup>  | Lw-H-V         | II        | 0.670        | 0.617          | 0.641              | 274.35                  | 274.35                  | 0.127                     | 0.841                     | 0.0360             | 0.9490             | 19         | Te   |
| Wu et al. (1976) <sup>133</sup>             | Lw-H-V         | II        | 0.683        | 0.596          | 0.539              | 276.2                   | 281.2                   | 0.2206                    | 0.5851                    | 0.2610             | 0.6200             | 3          | Te   |
|                                             | Lw-H-V-<br>LHC | II        | 1.015        | 0.763          | 0.322              | 281.25                  | 297.45                  | 2.745                     | 15.524                    | 0.9319             | 0.9941             | 15         | Te   |
| <b>Overall/Test</b>                         | —              | —         | <b>1.121</b> | <b>0.988</b>   | <b>0.597</b>       | <b>273.8</b>            | <b>305</b>              | <b>0.127</b>              | <b>63.33</b>              | <b>0.0010</b>      | <b>0.9977</b>      | <b>156</b> | —    |

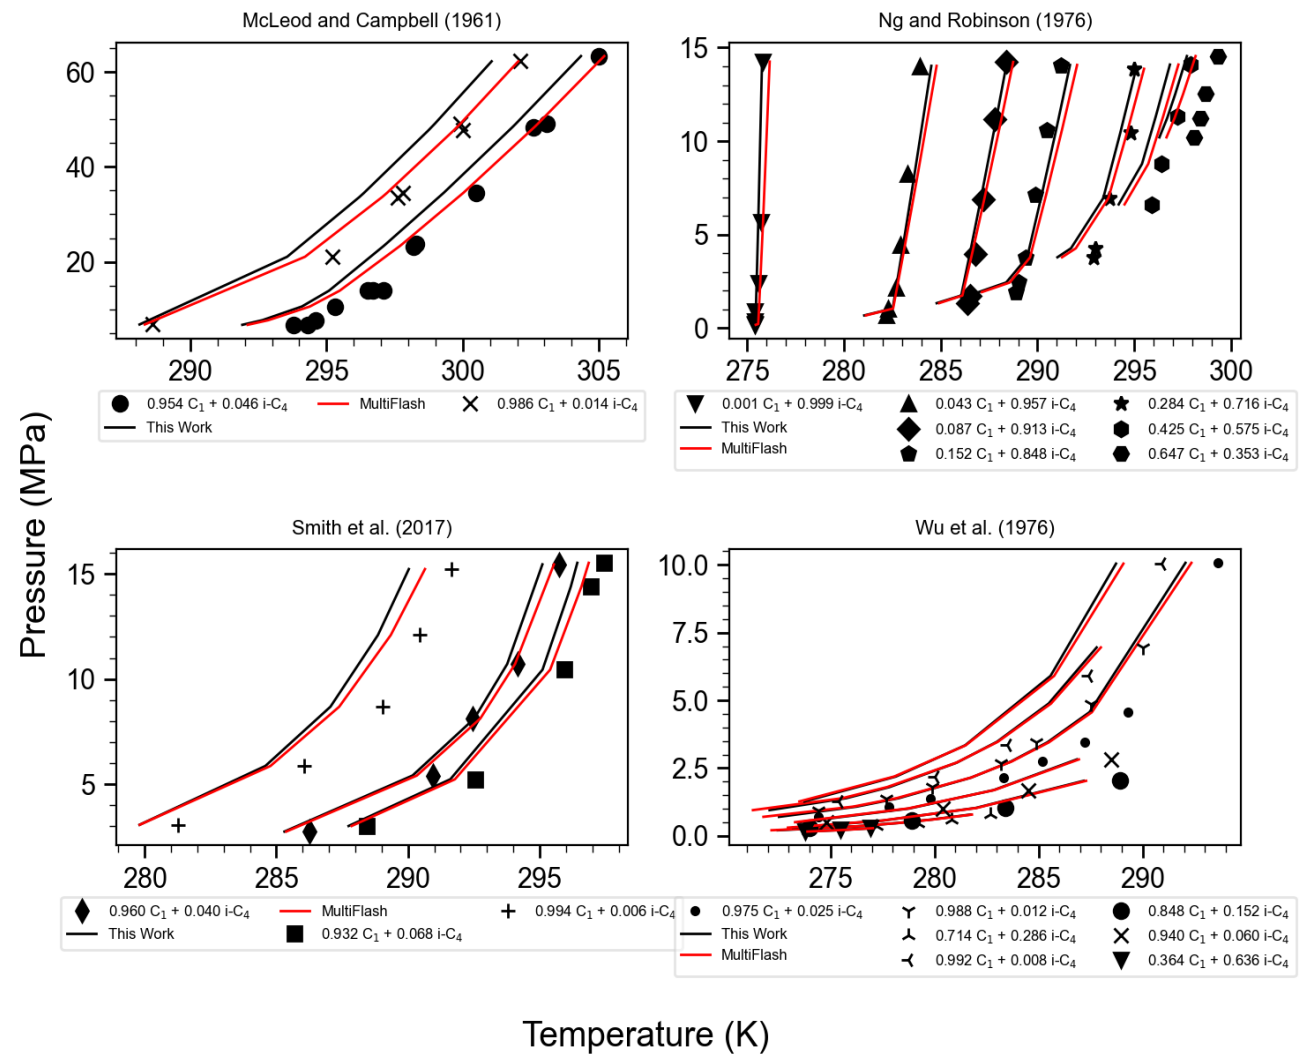

Figure S40: Selected hydrate equilibrium datasets  $\text{CH}_4 + i\text{-C}_4\text{H}_{10}$  binary-gas mixture hydrates, along with the predictions from two models: the CaSH model (black) and the MultiFlash 7.0 CPA-Hydrates (red). Datasets:<sup>40,133,137,162</sup>

### 3.2.7. $C_3H_8 + i-C_4H_{10}$ binary-gas mixture hydrate equilibria

Table S28: Database of  $C_3H_8 + i-C_4H_{10}$  binary-gas mixture hydrate equilibrium data, with comparison of the AADT of the cavity-based hydrate model with CPAHYD-MF and B&S. Data types:

'Tr' = Training data; 'Te' = Test data.

| Reference                                  | Phases         | Structure | AADT<br>(K)  | MF AADT<br>(K) | CSMGem AADT<br>(K) | $T_{min}$<br>(K) | $T_{max}$<br>(K) | $P_{min}$<br>(MPa) | $P_{max}$<br>(MPa) | $x_{1,min}$   | $x_{1,max}$   | $N$       | Type |
|--------------------------------------------|----------------|-----------|--------------|----------------|--------------------|------------------|------------------|--------------------|--------------------|---------------|---------------|-----------|------|
| Kamath and Holder<br>(1982) <sup>178</sup> | I-H-V          | II        | 0.757        | 0.712          | 0.544              | 272.08           | 272.23           | 0.108              | 0.154              | 0.1250        | 0.9590        | 11        | Te   |
| Paranjpe et al. (1987) <sup>136</sup>      | Lw-H-V-<br>LHC | II        | 0.262        | 0.318          | 0.070              | 275.25           | 277.85           | 0.234              | 0.490              | 0.1120        | 0.7940        | 6         | Te   |
| Patil (1987) <sup>119</sup>                | Lw-H-V-<br>LHC | II        | 0.263        | 0.320          | 0.070              | 275.25           | 277.85           | 0.213              | 0.491              | 0.1124        | 0.7935        | 6         | Te   |
| <b>Overall/Test</b>                        | —              | —         | <b>0.499</b> | <b>0.507</b>   | <b>0.297</b>       | <b>272.08</b>    | <b>277.85</b>    | <b>0.108</b>       | <b>0.491</b>       | <b>0.1120</b> | <b>0.9590</b> | <b>23</b> | —    |

### 3.2.8. $CO_2 + i-C_4H_{10}$ binary-gas mixture hydrate equilibria

Table S29: Database of  $CO_2 + i-C_4H_{10}$  binary-gas mixture hydrate equilibrium data, with comparison of the AADT of the cavity-based hydrate model with CPAHYD-MF and B&S. Data types:

'Tr' = Training data; 'Te' = Test data.

| Reference                                     | Phases     | Structure | AADT<br>(K)  | MF AADT<br>(K) | CSMGem AADT<br>(K) | $T_{min}$<br>(K) | $T_{max}$<br>(K) | $P_{min}$<br>(MPa) | $P_{max}$<br>(MPa) | $x_{1,min}$  | $x_{1,max}$  | $N$       | Type |
|-----------------------------------------------|------------|-----------|--------------|----------------|--------------------|------------------|------------------|--------------------|--------------------|--------------|--------------|-----------|------|
| Adisasmito and Sloan<br>(1992) <sup>161</sup> | Lw-H-<br>V | II        | 1.005        | 0.636          | 1.254              | 273.7            | 280.9            | 0.145              | 3.179              | 0.207        | 0.996        | 43        | Te   |
| Adisasmito and Sloan<br>(1992) <sup>161</sup> | Lw-H-<br>V | I         | 0.060        | 0.053          | 1.548              | 273.7            | 280.9            | 1.324              | 3.172              | 0.207        | 0.996        | 10        | Te   |
| <b>Overall/Test</b>                           | —          | —         | <b>0.827</b> | <b>0.526</b>   | <b>1.310</b>       | <b>273.7</b>     | <b>280.9</b>     | <b>0.145</b>       | <b>3.179</b>       | <b>0.207</b> | <b>0.996</b> | <b>53</b> | —    |

### 3.3. Ternary-gas and Multicomponent-gas hydrate equilibria

For ternary-gas mixture hydrate equilibria, for brevity we only plot the experimental datasets for  $\text{CH}_4 + \text{C}_3\text{H}_8 + \text{H}_2\text{S}$  as these were used training the  $\text{H}_2\text{S}$  5<sup>12</sup>6<sup>4</sup> Kihara potential parameters in Figure S41. For multicomponent mixtures, a similar approach to binary-gas mixtures is used where only datasets with 3 or more points at a given composition are plotted on a pressure-temperature axis. The Deaton and Frost<sup>16</sup> multicomponent datasets are split over three groups due to the numerous multicomponent mixtures measured.

Table S30: Database of ternary-gas mixture hydrate equilibrium data, with comparison of the AADT of the cavity-based hydrate model with CPAHYD-MF and B&S. All of the data is test data, with the exception of the  $\text{CH}_4 + \text{C}_3\text{H}_8 + \text{H}_2\text{S}$  data.

| Reference                                   | Mixtures                                                         | Phases     | Structure | AADT (K) | MF AADT (K) | CSMGem AADT (K) | $T_{min}$ (K) | $T_{max}$ (K) | $P_{min}$ (MPa) | $P_{max}$ (MPa) | $N$ |
|---------------------------------------------|------------------------------------------------------------------|------------|-----------|----------|-------------|-----------------|---------------|---------------|-----------------|-----------------|-----|
| Behnammotlagh et al. (2022) <sup>179</sup>  | $\text{CH}_4 + \text{C}_3\text{H}_8 + \text{H}_2\text{S}$        | Lw-H-V     | II        | 0.159    | 0.536       | 0.186           | 284.25        | 296.05        | 2.29            | 12.08           | 5   |
| Dharmawardhana et al. (1980) <sup>180</sup> | $\text{CH}_4 + \text{C}_2\text{H}_6 + \text{C}_3\text{H}_8$      | Lw-H-V     | I         | 0.530    | 0.213       | 0.167           | 279.76        | 283.98        | 1.25            | 2.275           | 8   |
|                                             | $\text{CH}_4 + \text{C}_2\text{H}_6 + \text{C}_3\text{H}_8$      | Lw-H-V     | II        | 0.559    | 0.600       | 0.532           | 275.76        | 282.04        | 0.92            | 1.882           | 3   |
| Fan et al. (2019) <sup>149</sup>            | $\text{CH}_4 + \text{C}_2\text{H}_6 + \text{CO}_2$               | Lw-H-V     | II        | 0.293    | 0.263       | 0.852           | 278.61        | 287.72        | 2.79            | 8.73            | 8   |
| Holder and Hand (1982) <sup>73</sup>        | $\text{CH}_4 + \text{C}_2\text{H}_6 + \text{C}_3\text{H}_8$      | Lw-H-V-LHC | II        | 0.417    | 0.396       | 0.429           | 280.10        | 287.40        | 1.24            | 2.28            | 9   |
|                                             | $\text{CH}_4 + \text{C}_2\text{H}_6 + \text{C}_3\text{H}_8$      | Lw-H-V-LHC | I         | 0.573    | 0.453       | 0.472           | 282.80        | 286.10        | 2.02            | 2.82            | 8   |
| Legoix et al. (2018) <sup>154</sup>         | $\text{CH}_4 + \text{N}_2 + \text{CO}_2$                         | Lw-H-V     | I         | 1.016    | 0.725       | 0.689           | 282.46        | 288.62        | 9.68            | 15.645          | 5   |
| Lim et al. (2017) <sup>36</sup>             | $\text{CH}_4 + \text{N}_2 + \text{CO}_2$                         | Lw-H-V     | I         | 0.309    | 0.485       | 0.557           | 279.60        | 293.00        | 4.81            | 30.66           | 30  |
| Mohammadi and Richon (2015) <sup>174</sup>  | $\text{CH}_4 + \text{CO}_2 + \text{H}_2\text{S}$                 | Lw-H-V     | I         | 0.369    | 0.208       | 0.288           | 274.20        | 280.60        | 0.88            | 1.71            | 5   |
| Mu et al. (2018) <sup>43</sup>              | $\text{CH}_4 + \text{N}_2 + \text{CO}_2$                         | Lw-H-V     | I         | 0.097    | 0.217       | 0.042           | 276.98        | 283.84        | 2.84            | 7.005           | 6   |
| Nixdorf and Oellrich (1997) <sup>46</sup>   | $\text{CH}_4 + \text{C}_2\text{H}_6 + \text{C}_3\text{H}_8$      | Lw-H-V     | II        | 0.385    | 0.273       | 0.210           | 277.10        | 298.14        | 1.20            | 24.474          | 13  |
| Nixdorf and Oellrich (1997) <sup>46</sup>   | $\text{CH}_4 + \text{C}_2\text{H}_6 + \text{N}_2$                | Lw-H-V     | II        | 0.452    | 0.229       | 0.403           | 277.36        | 294.23        | 2.58            | 23.833          | 7   |
| Obanijesu et al. (2014) <sup>155</sup>      | $\text{CH}_4 + \text{N}_2 + \text{CO}_2$                         | Lw-H-V     | I         | 4.818    | 4.705       | 4.633           | 281.95        | 286.45        | 10.00           | 20              | 5   |
| Ovalle et al. (2022) <sup>181</sup>         | $\text{CH}_4 + \text{C}_2\text{H}_6 + \text{C}_3\text{H}_8$      | Lw-H-V     | II        | 0.150    | 0.242       | 0.110           | 277.49        | 285.82        | 1.24            | 3.5             | 5   |
|                                             | $\text{CH}_4 + \text{CO}_2 + \text{C}_3\text{H}_8$               | Lw-H-V     | II        | 0.570    | 0.605       | 0.350           | 277.98        | 287.96        | 1.25            | 4.75            | 5   |
| Paranjpe et al. (1987) <sup>136</sup>       | $\text{CH}_4 + \text{C}_3\text{H}_8 + i\text{-C}_4\text{H}_{10}$ | Lw-H-V-LHC | II        | 0.223    | 0.233       | 0.291           | 276.20        | 281.20        | 0.25            | 0.7736          | 11  |
|                                             | $\text{CH}_4 + \text{C}_3\text{H}_8 + n\text{-C}_4\text{H}_{10}$ | Lw-H-V-LHC | II        | 4.260    | 4.743       | 4.710           | 268.20        | 281.20        | 0.22            | 2.6438          | 10  |
| Robinson and Hutton (1967) <sup>182</sup>   | $\text{CH}_4 + \text{CO}_2 + \text{H}_2\text{S}$                 | Lw-H-V     | I         | 1.109    | 1.216       | 0.965           | 279.20        | 297.60        | 1.48            | 15.707          | 34  |
| Sabil et al. (2014) <sup>52</sup>           | $\text{CH}_4 + \text{N}_2 + \text{CO}_2$                         | Lw-H-V     | I         | 1.732    | 1.919       | 1.852           | 280.65        | 289.86        | 2.71            | 12.1            | 7   |
| Schroeter et al. (1983) <sup>183</sup>      | $\text{CH}_4 + \text{C}_3\text{H}_8 + \text{H}_2\text{S}$        | Lw-H-V     | II        | 0.560    | 0.333       | 2.613           | 275.85        | 300.95        | 0.34            | 4.274751        | 13  |
| Smith et al. (2017) <sup>137</sup>          | $\text{N}_2 + \text{CH}_4 + \text{C}_3\text{H}_8$                | Lw-H-V     | II        | 0.883    | 0.529       | 0.882           | 284.15        | 294.75        | 2.89            | 16.027          | 5   |
|                                             | $\text{N}_2 + \text{CH}_4 + i\text{-C}_4\text{H}_{10}$           | Lw-H-V     | II        | 0.604    | 0.385       | 0.255           | 286.35        | 295.85        | 3.19            | 14.963          | 4   |
|                                             | $\text{N}_2 + \text{CH}_4 + n\text{-C}_4\text{H}_{10}$           | Lw-H-V     | II        | 0.469    | 0.812       | 0.582           | 277.95        | 286.45        | 2.75            | 12.09           | 4   |

| Reference                            | Mixtures                                                                        | Phases | Structure | AADT (K)     | MF AADT (K)  | CSMGem AADT (K) | $T_{min}$ (K) | $T_{max}$ (K) | $P_{min}$ (MPa) | $P_{max}$ (MPa) | $N$        |
|--------------------------------------|---------------------------------------------------------------------------------|--------|-----------|--------------|--------------|-----------------|---------------|---------------|-----------------|-----------------|------------|
| Sun et al. (2003) <sup>184</sup>     | CH <sub>4</sub> + CO <sub>2</sub> + H <sub>2</sub> S                            | Lw-H-V | I         | 0.925        | 0.724        | 0.849           | 274.20        | 299.70        | 0.58            | 8.68            | 59         |
| Sun et al. (2016) <sup>108</sup>     | CH <sub>4</sub> + N <sub>2</sub> + CO <sub>2</sub>                              | Lw-H-V | I         | 0.051        | 0.042        | 0.055           | 276.15        | 278.15        | 2.14            | 2.744           | 9          |
| Sun et al. (2017) <sup>185</sup>     | CH <sub>4</sub> + N <sub>2</sub> + CO <sub>2</sub>                              | Lw-H-V | I         | 0.378        | 0.305        | 0.334           | 274.90        | 283.90        | 2.29            | 14.97           | 45         |
| Sun Zhi-Gao (2001) <sup>186</sup>    | CH <sub>4</sub> + C <sub>2</sub> H <sub>6</sub> + C <sub>3</sub> H <sub>8</sub> | Lw-H-V | II        | 0.271        | 0.282        | 0.288           | 273.58        | 288.96        | 0.91            | 5.37            | 7          |
| Ward et al. (2015a) <sup>175</sup>   | CH <sub>4</sub> + C <sub>3</sub> H <sub>8</sub> + H <sub>2</sub> S              | Lw-H-V | II        | 0.609        | 1.522        | 1.691           | 286.22        | 304.80        | 1.36            | 6.89            | 10         |
| Zang and Liang (2018) <sup>187</sup> | CH <sub>4</sub> + N <sub>2</sub> + CO <sub>2</sub>                              | Lw-H-V | I         | 0.477        | 0.398        | 0.496           | 276.20        | 286.30        | 2.59            | 8.84            | 34         |
| <b>Overall</b>                       | —                                                                               | —      | —         | <b>0.742</b> | <b>0.730</b> | <b>0.838</b>    | <b>268.20</b> | <b>304.80</b> | <b>0.22</b>     | <b>30.66</b>    | <b>374</b> |

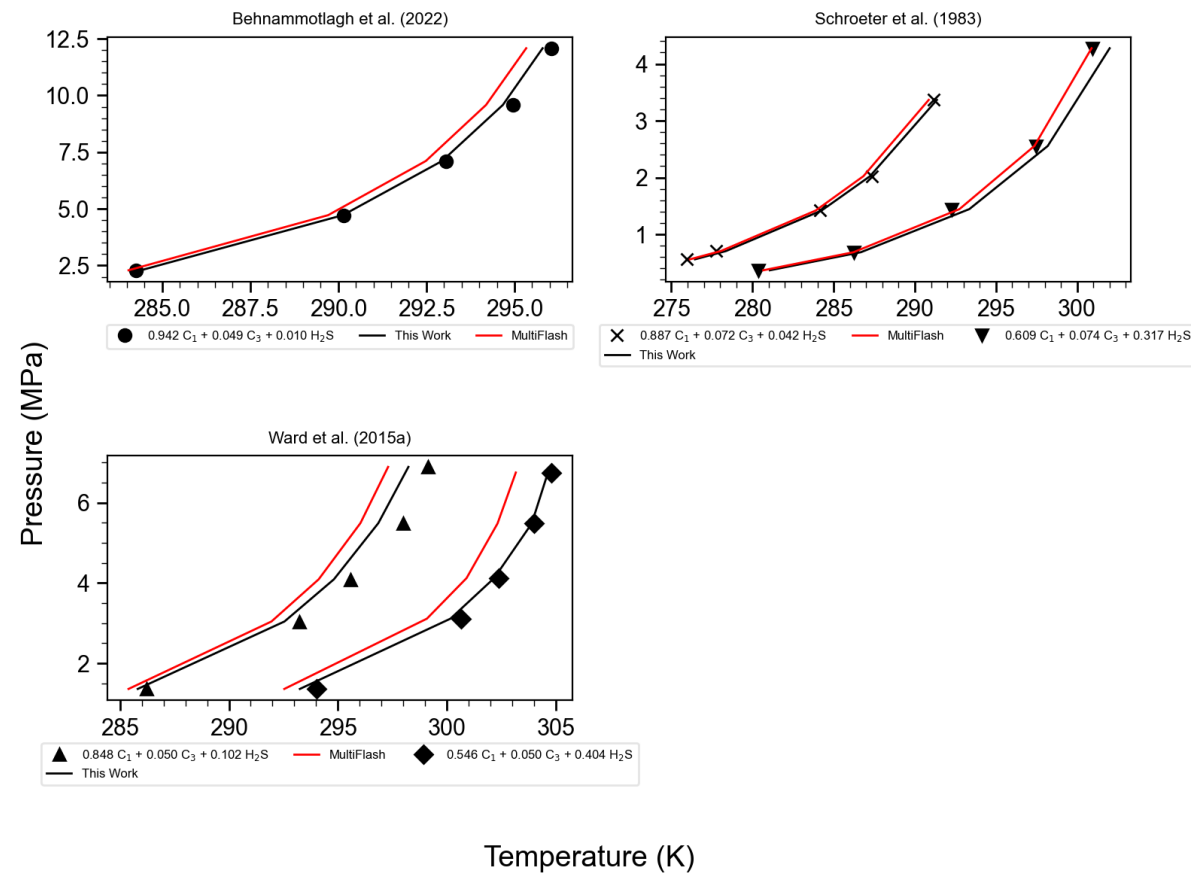

Figure S41: Selected hydrate equilibrium datasets for CH<sub>4</sub> + C<sub>3</sub>H<sub>8</sub> + H<sub>2</sub>S ternary gas mixture hydrates, along with the predictions from two models: the CaSH model (black) and the MultiFlash 7.0 CPA-Hydrates (red). Datasets:<sup>175,179,183</sup>

Table S31: Database of multicomponent-gas-mixture hydrate equilibrium data with comparison of the AADT of the cavity-based hydrate model with CPAHYD-MF and B&amp;S.

| Reference                                  | Mixtures                                                                                                                                                                                                                                     | Phases | Structure | AA DT (K)    | MF AADT (K)  | CSMGem AADT (K) | T <sub>min</sub> (K) | T <sub>max</sub> (K) | P <sub>min</sub> (MPa) | P <sub>max</sub> (MPa) | N          |
|--------------------------------------------|----------------------------------------------------------------------------------------------------------------------------------------------------------------------------------------------------------------------------------------------|--------|-----------|--------------|--------------|-----------------|----------------------|----------------------|------------------------|------------------------|------------|
| Adisasmito and Sloan (1992) <sup>161</sup> | CH <sub>4</sub> , C <sub>2</sub> H <sub>6</sub> , C <sub>3</sub> H <sub>8</sub> , i-C <sub>4</sub> H <sub>10</sub> , n-C <sub>4</sub> H <sub>10</sub>                                                                                        | Lw-H-V | II        | 0.484        | 0.562        | 0.653           | 273.70               | 282.00               | 0.4966                 | 1.4138                 | 4          |
|                                            | CH <sub>4</sub> , C <sub>2</sub> H <sub>6</sub> , C <sub>3</sub> H <sub>8</sub> , i-C <sub>4</sub> H <sub>10</sub> , n-C <sub>4</sub> H <sub>10</sub> , CO <sub>2</sub>                                                                      | Lw-H-V | II        | 0.868        | 0.772        | 0.846           | 273.70               | 282.00               | 0.5931                 | 3.5103                 | 12         |
|                                            | CH <sub>4</sub> , C <sub>2</sub> H <sub>6</sub> , C <sub>3</sub> H <sub>8</sub> , i-C <sub>4</sub> H <sub>10</sub> , n-C <sub>4</sub> H <sub>10</sub> , CO <sub>2</sub>                                                                      | Lw-H-V | I         | 0.227        | 0.210        | 0.316           | 273.70               | 282.00               | 1.3379                 | 3.469                  | 4          |
| Cha et al. (2013) <sup>188</sup>           | CH <sub>4</sub> , C <sub>2</sub> H <sub>6</sub> , C <sub>3</sub> H <sub>8</sub> , n-C <sub>4</sub> H <sub>10</sub>                                                                                                                           | Lw-H-V | II        | 0.946        | 0.981        | 0.760           | 289.60               | 294.70               | 5.2                    | 11.3                   | 3          |
| Deaton and Frost (1946) <sup>16</sup>      | N <sub>2</sub> , CO <sub>2</sub> , CH <sub>4</sub> , C <sub>2</sub> H <sub>6</sub> , C <sub>3</sub> H <sub>8</sub> , i-C <sub>4</sub> H <sub>10</sub>                                                                                        | Lw-H-V | II        | 1.068        | 1.026        | 1.198           | 273.70               | 294.00               | 0.6                    | 9.391                  | 75         |
|                                            | N <sub>2</sub> , CO <sub>2</sub> , H <sub>2</sub> S, CH <sub>4</sub> , C <sub>2</sub> H <sub>6</sub> , C <sub>3</sub> H <sub>8</sub> , i-C <sub>4</sub> H <sub>10</sub>                                                                      | Lw-H-V | II        | 0.497        | 0.433        | 0.685           | 275.40               | 289.30               | 0.945                  | 5.254                  | 4          |
|                                            | N <sub>2</sub> , CH <sub>4</sub> , C <sub>2</sub> H <sub>6</sub> , C <sub>3</sub> H <sub>8</sub> , i-C <sub>4</sub> H <sub>10</sub>                                                                                                          | Lw-H-V | II        | 1.375        | 1.317        | 1.701           | 273.70               | 291.50               | 0.758                  | 7.729                  | 11         |
|                                            | N <sub>2</sub> , CO <sub>2</sub> , CH <sub>4</sub> , C <sub>2</sub> H <sub>6</sub> , C <sub>3</sub> H <sub>8</sub>                                                                                                                           | Lw-H-V | II        | 1.398        | 1.198        | 1.810           | 273.70               | 289.80               | 1.262                  | 10.439                 | 9          |
| Fan and Guo (1999) <sup>87</sup>           | CH <sub>4</sub> , C <sub>2</sub> H <sub>6</sub> , CO <sub>2</sub> , N <sub>2</sub>                                                                                                                                                           | Lw-H-V | I         | 0.396        | 0.299        | 0.268           | 272.80               | 279.30               | 1.16                   | 2.77                   | 5          |
| Kobayashi et al. (1951) <sup>189</sup>     | CH <sub>4</sub> , C <sub>2</sub> H <sub>6</sub> , C <sub>3</sub> H <sub>8</sub> , i-C <sub>4</sub> H <sub>10</sub> , n-C <sub>4</sub> H <sub>10</sub> , n-C <sub>5</sub> H <sub>12</sub> , n-C <sub>6</sub> H <sub>14</sub> , N <sub>2</sub> | Lw-H-V | II        | 1.326        | 1.355        | 1.427           | 283.30               | 291.00               | 2.186                  | 5.661                  | 5          |
|                                            | CH <sub>4</sub> , C <sub>2</sub> H <sub>6</sub> , C <sub>3</sub> H <sub>8</sub> , i-C <sub>4</sub> H <sub>10</sub> , n-C <sub>4</sub> H <sub>10</sub> , n-C <sub>5</sub> H <sub>12</sub> , N <sub>2</sub>                                    | Lw-H-V | II        | 1.078        | 1.184        | 1.256           | 281.60               | 290.90               | 1.765                  | 5.583                  | 5          |
| Lee and Kang (2011) <sup>190</sup>         | CH <sub>4</sub> , C <sub>2</sub> H <sub>6</sub> , C <sub>3</sub> H <sub>8</sub> , i-C <sub>4</sub> H <sub>10</sub> , n-C <sub>4</sub> H <sub>10</sub> , N <sub>2</sub>                                                                       | Lw-H-V | II        | 0.990        | 1.040        | 0.892           | 281.40               | 291.40               | 1.71                   | 6.61                   | 5          |
| McLeod and Campbell (1961) <sup>40</sup>   | CH <sub>4</sub> , C <sub>2</sub> H <sub>6</sub> , C <sub>3</sub> H <sub>8</sub> , i-C <sub>4</sub> H <sub>10</sub> , n-C <sub>4</sub> H <sub>10</sub>                                                                                        | Lw-H-V | II        | 0.339        | 0.829        | 0.876           | 293.60               | 303.10               | 13.55                  | 62.85                  | 7          |
| Mei et al. (1998) <sup>191</sup>           | CH <sub>4</sub> , C <sub>2</sub> H <sub>6</sub> , C <sub>3</sub> H <sub>8</sub> , i-C <sub>4</sub> H <sub>10</sub>                                                                                                                           | Lw-H-V | II        | 1.861        | 2.095        | 1.462           | 273.50               | 281.90               | 0.92                   | 2.67                   | 8          |
| Ng and Robinson (1976) <sup>162</sup>      | C <sub>2</sub> H <sub>6</sub> , C <sub>3</sub> H <sub>8</sub> , i-C <sub>4</sub> H <sub>10</sub> , N <sub>2</sub>                                                                                                                            | Lw-H-V | II        | 0.257        | 0.070        | 0.587           | 277.70               | 277.80               | 1.158                  | 9.714                  | 7          |
|                                            | CH <sub>4</sub> , C <sub>2</sub> H <sub>6</sub> , C <sub>3</sub> H <sub>8</sub> , i-C <sub>4</sub> H <sub>10</sub> , N <sub>2</sub>                                                                                                          | Lw-H-V | II        | 0.115        | 0.110        | 0.410           | 281.20               | 293.90               | 1.565                  | 13.623                 | 13         |
|                                            | C <sub>2</sub> H <sub>6</sub> , C <sub>3</sub> H <sub>8</sub> , i-C <sub>4</sub> H <sub>10</sub> , CO <sub>2</sub>                                                                                                                           | Lw-H-V | II        | 1.621        | 0.240        | 0.771           | 274.80               | 285.70               | 0.689                  | 14.7                   | 14         |
|                                            | C <sub>2</sub> H <sub>6</sub> , C <sub>3</sub> H <sub>8</sub> , i-C <sub>4</sub> H <sub>10</sub> , i-C <sub>5</sub> H <sub>12</sub>                                                                                                          | Lw-H-V | II        | 0.332        | 0.310        | 0.879           | 274.80               | 275.60               | 0.689                  | 11.893                 | 5          |
| Nixdorf and Oellrich (1997) <sup>46</sup>  | CH <sub>4</sub> , C <sub>3</sub> H <sub>8</sub> , N <sub>2</sub> , CO <sub>2</sub>                                                                                                                                                           | Lw-H-V | II        | 0.895        | 1.034        | 0.533           | 279.19               | 296.07               | 1.693                  | 23.565                 | 6          |
|                                            | CH <sub>4</sub> , C <sub>2</sub> H <sub>6</sub> , N <sub>2</sub> , CO <sub>2</sub>                                                                                                                                                           | Lw-H-V | II        | 0.348        | 0.232        | 0.599           | 279.01               | 294.21               | 2.964                  | 24.326                 | 6          |
| Saberi et al. (2018) <sup>51</sup>         | CH <sub>4</sub> , C <sub>2</sub> H <sub>6</sub> , C <sub>3</sub> H <sub>8</sub> , i-C <sub>4</sub> H <sub>10</sub> , n-C <sub>4</sub> H <sub>10</sub> , N <sub>2</sub> , CO <sub>2</sub>                                                     | Lw-H-V | II        | 0.874        | 0.922        | 0.907           | 289.90               | 294.50               | 3.95                   | 8.2                    | 6          |
| Sabil et al. (2014) <sup>52</sup>          | CH <sub>4</sub> , C <sub>2</sub> H <sub>6</sub> , C <sub>3</sub> H <sub>8</sub> , i-C <sub>4</sub> H <sub>10</sub> , n-C <sub>4</sub> H <sub>10</sub> , N <sub>2</sub> , CO <sub>2</sub>                                                     | Lw-H-V | I         | 1.964        | 2.125        | 2.106           | 280.95               | 290.15               | 2.75                   | 12.5                   | 11         |
| Wilcox et al. (1941) <sup>192</sup>        | CH <sub>4</sub> , C <sub>2</sub> H <sub>6</sub> , C <sub>3</sub> H <sub>8</sub> , N <sub>2</sub> , CO <sub>2</sub>                                                                                                                           | Lw-H-V | II        | 0.200        | 0.292        | 0.332           | 277.70               | 296.70               | 1.6                    | 27.503                 | 15         |
|                                            | CH <sub>4</sub> , C <sub>2</sub> H <sub>6</sub> , C <sub>3</sub> H <sub>8</sub> , i-C <sub>4</sub> H <sub>10</sub> , n-C <sub>4</sub> H <sub>10</sub> , C <sub>5</sub> H <sub>12</sub> , N <sub>2</sub>                                      | Lw-H-V | II        | 0.318        | 0.442        | 0.365           | 278.80               | 298.30               | 1.255                  | 27.32                  | 9          |
| <b>Overall</b>                             | —                                                                                                                                                                                                                                            | —      | —         | <b>0.923</b> | <b>0.855</b> | <b>1.001</b>    | <b>272.80</b>        | <b>303.10</b>        | <b>0.4966</b>          | <b>62.85</b>           | <b>249</b> |



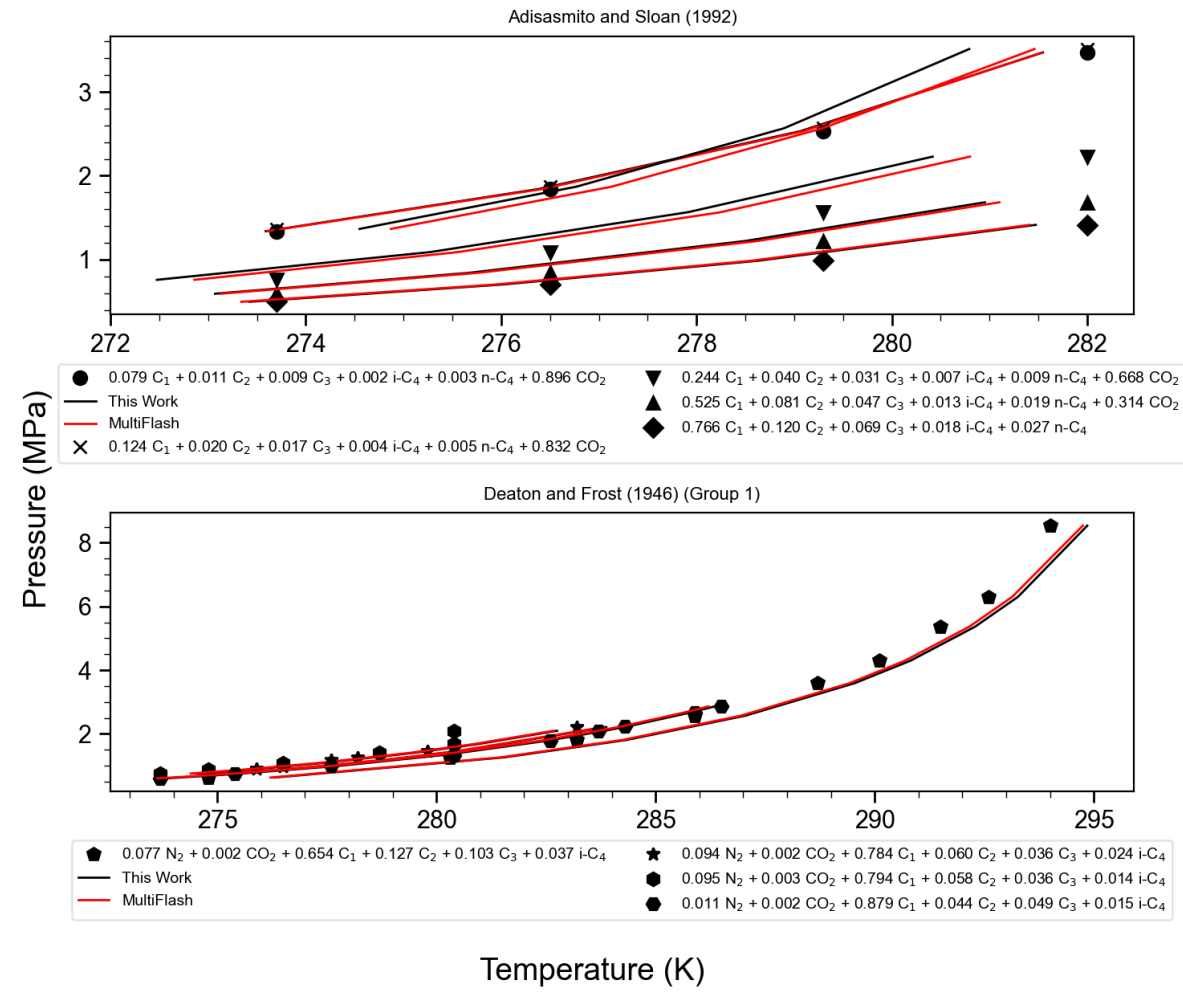

Figure S42: Selected hydrate equilibrium datasets for multicomponent gas mixture hydrates, along with the predictions from two models: the CaSH model (black) and the MultiFlash 7.0 CPA-Hydrates (red). Datasets:<sup>16,161</sup>, with water-free compositions labelled in the figure legends.

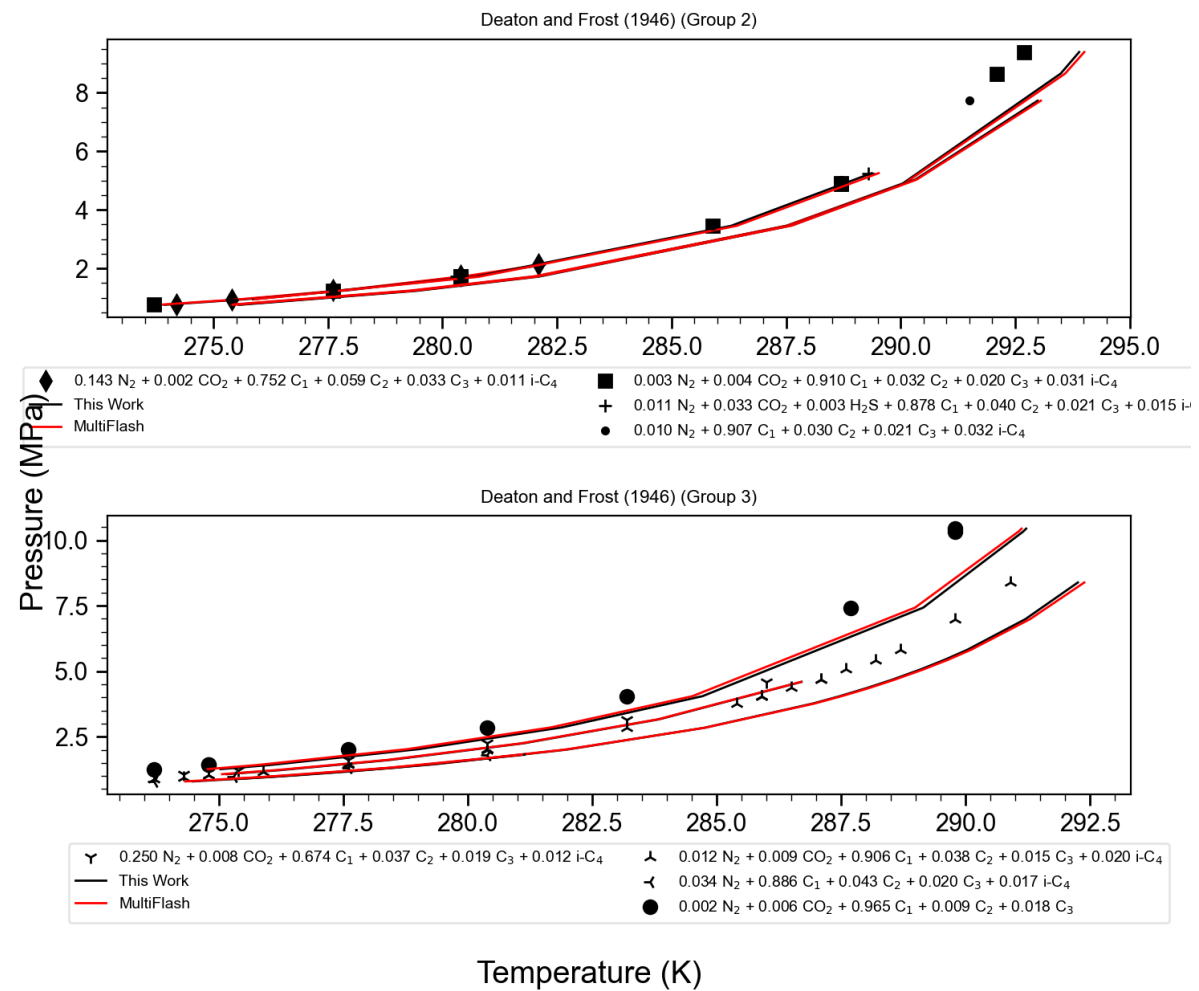

Figure S43: Selected hydrate equilibrium datasets for multicomponent gas mixture hydrates, along with the predictions from two models: the CaSH model (black) and the MultiFlash 7.0 CPA-Hydrates (red). Datasets:<sup>16</sup>, with water-free compositions labelled in the figure legends.

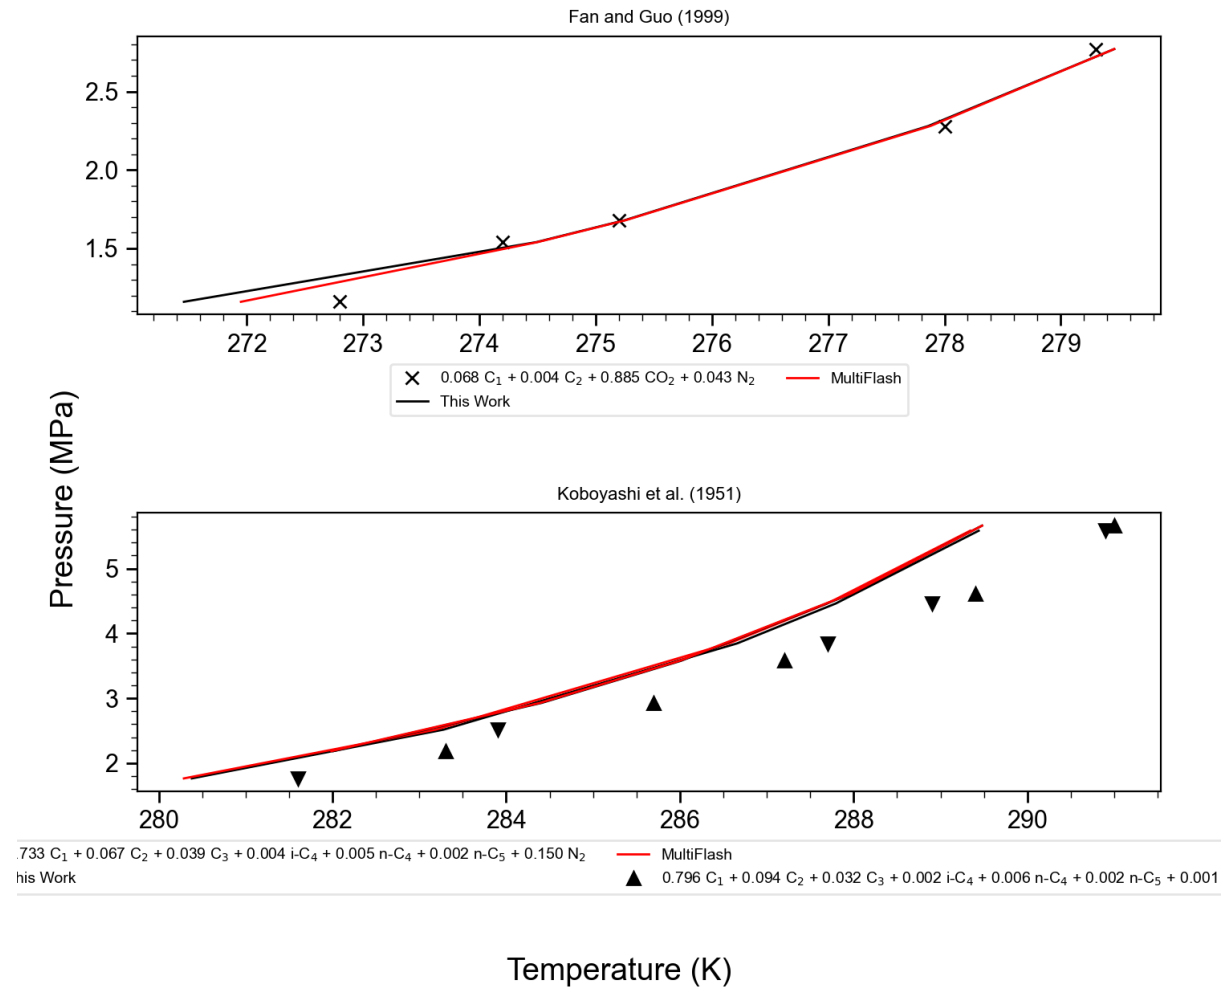

Figure S44: Selected hydrate equilibrium datasets for multicomponent gas mixture hydrates, along with the predictions from two models: the CaSH model (black) and the MultiFlash 7.0 CPA-Hydrates (red). Datasets:<sup>87,189</sup>, with water-free compositions labelled in the figure legends.

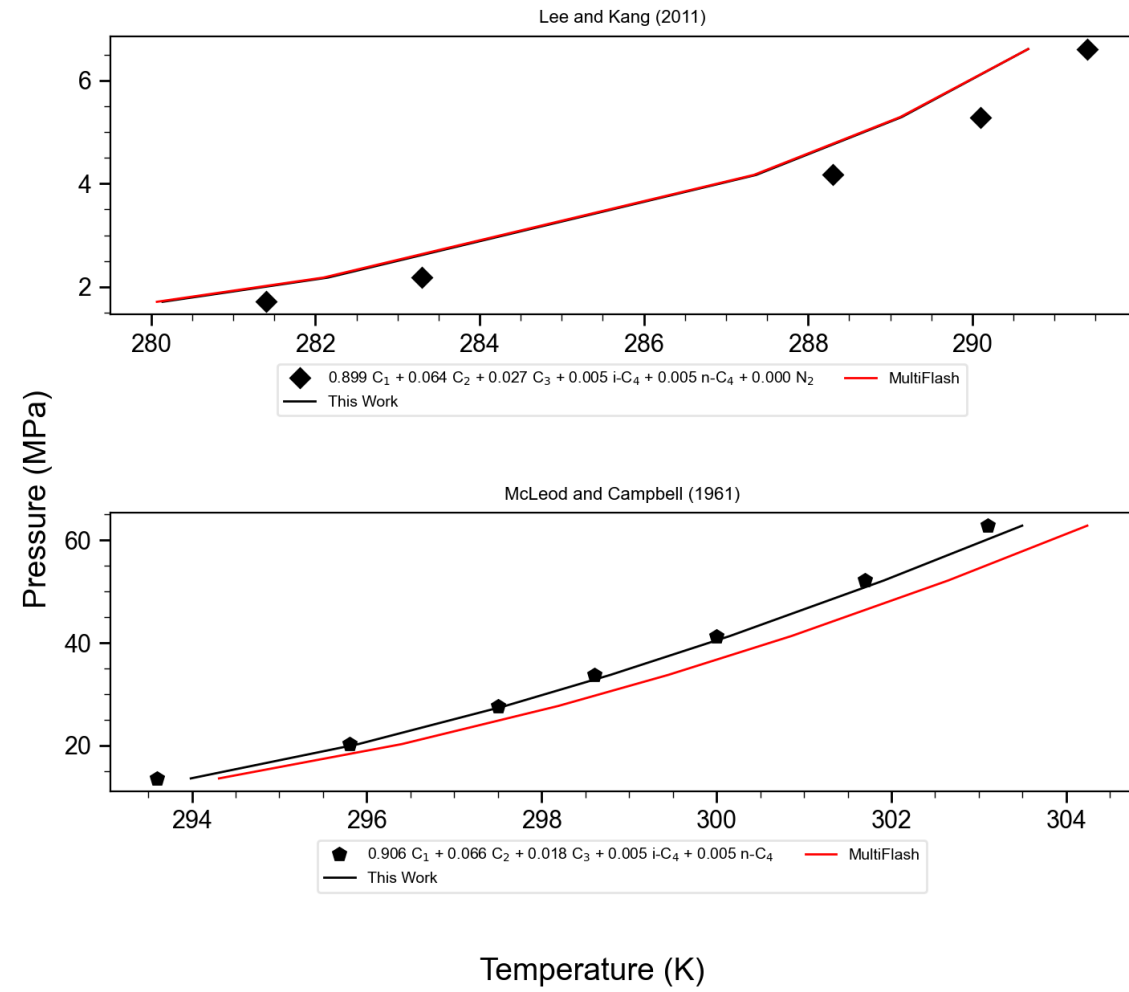

Figure S45: Selected hydrate equilibrium datasets for multicomponent gas mixture hydrates, along with the predictions from two models: the CaSH model (black) and the MultiFlash 7.0 CPA-Hydrates (red). Datasets:<sup>40,190</sup>, with water-free compositions labelled in the figure legends.

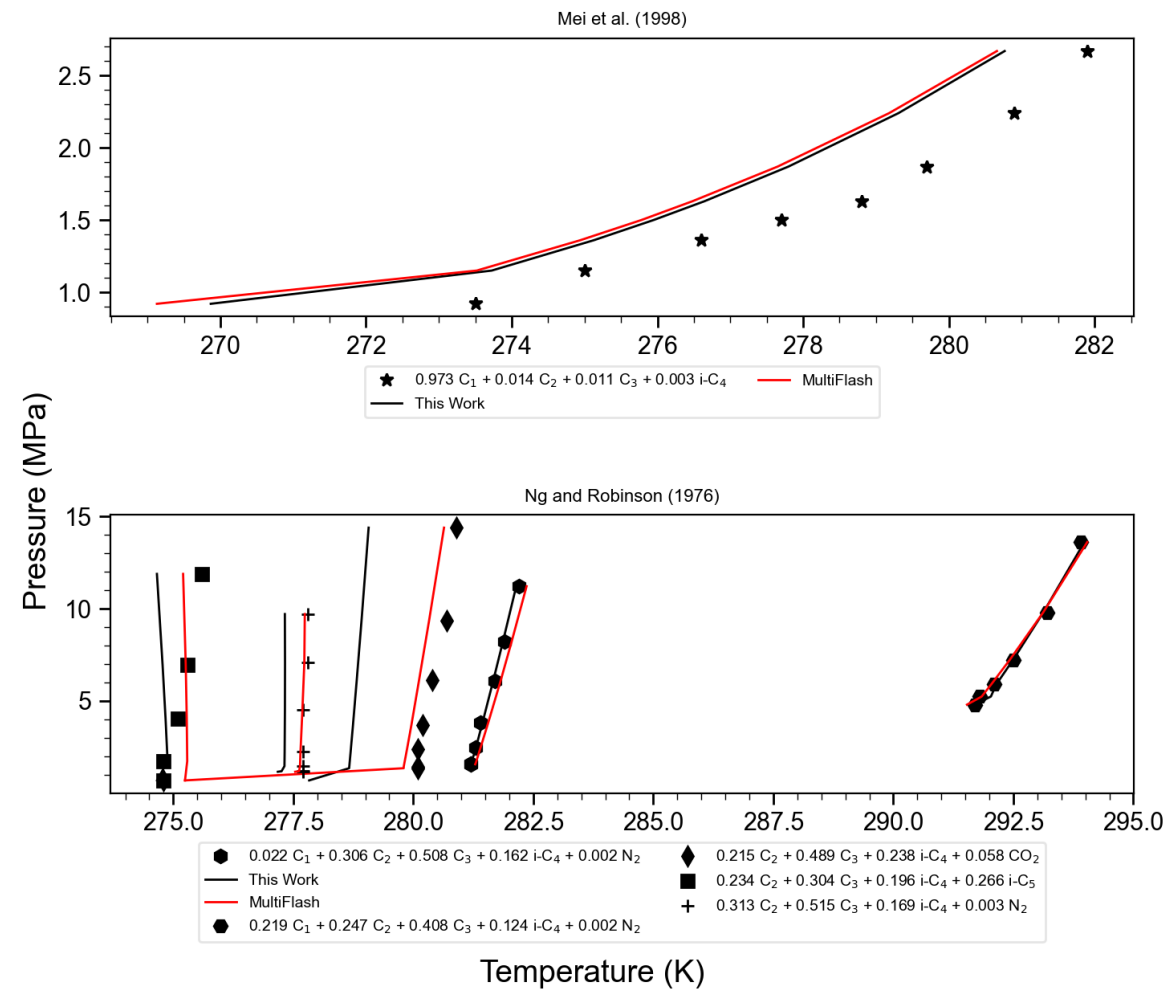

Figure S46: Selected hydrate equilibrium datasets for multicomponent gas mixture hydrates, along with the predictions from two models: the CaSH model (black) and the MultiFlash 7.0 CPA-Hydrates (red). Datasets:<sup>162,191</sup>, with water-free compositions labelled in the figure legends.

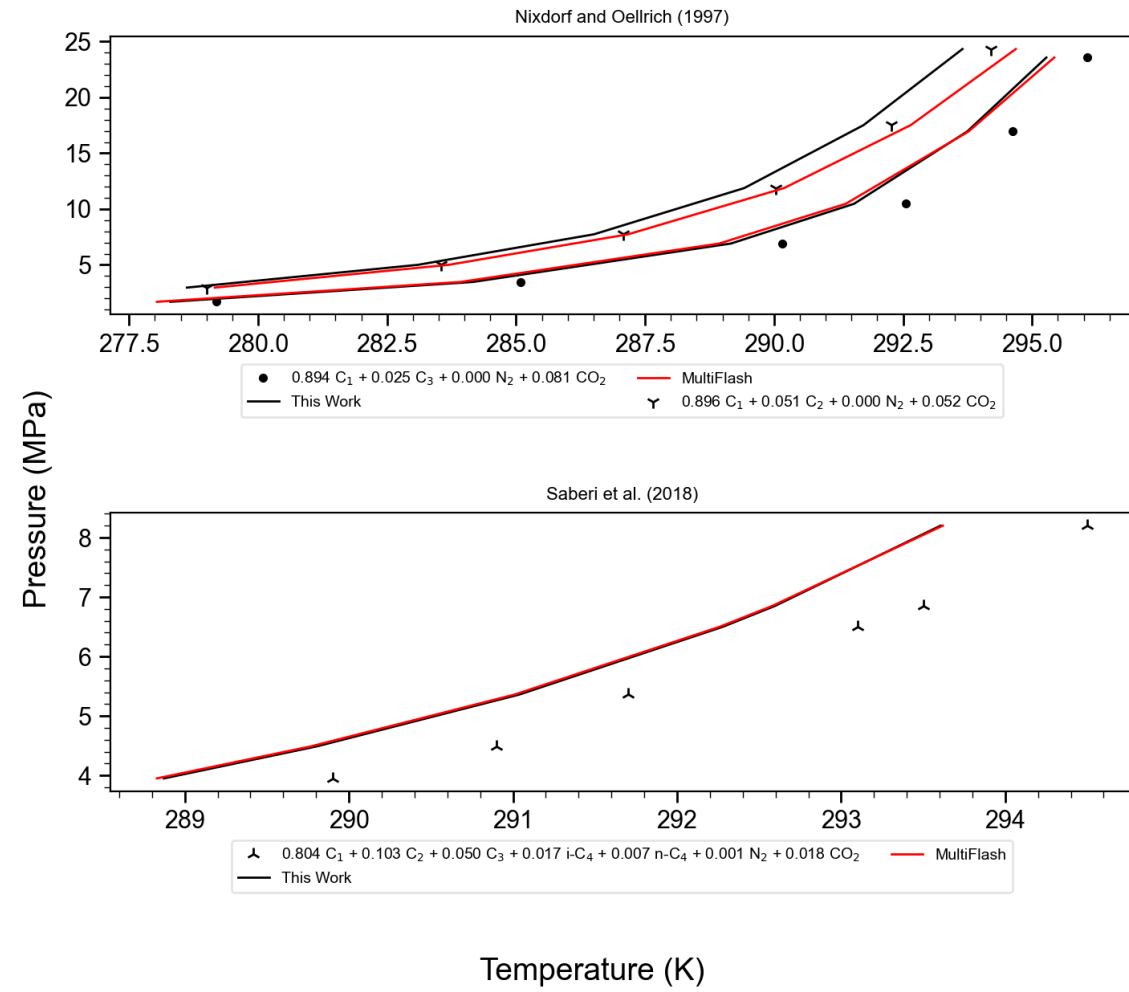

Figure S47: Selected hydrate equilibrium datasets for multicomponent gas mixture hydrates, along with the predictions from two models: the CaSH model (black) and the MultiFlash 7.0 CPA-Hydrates (red). Datasets:<sup>46,51</sup>, with water-free compositions labelled in the figure legends.

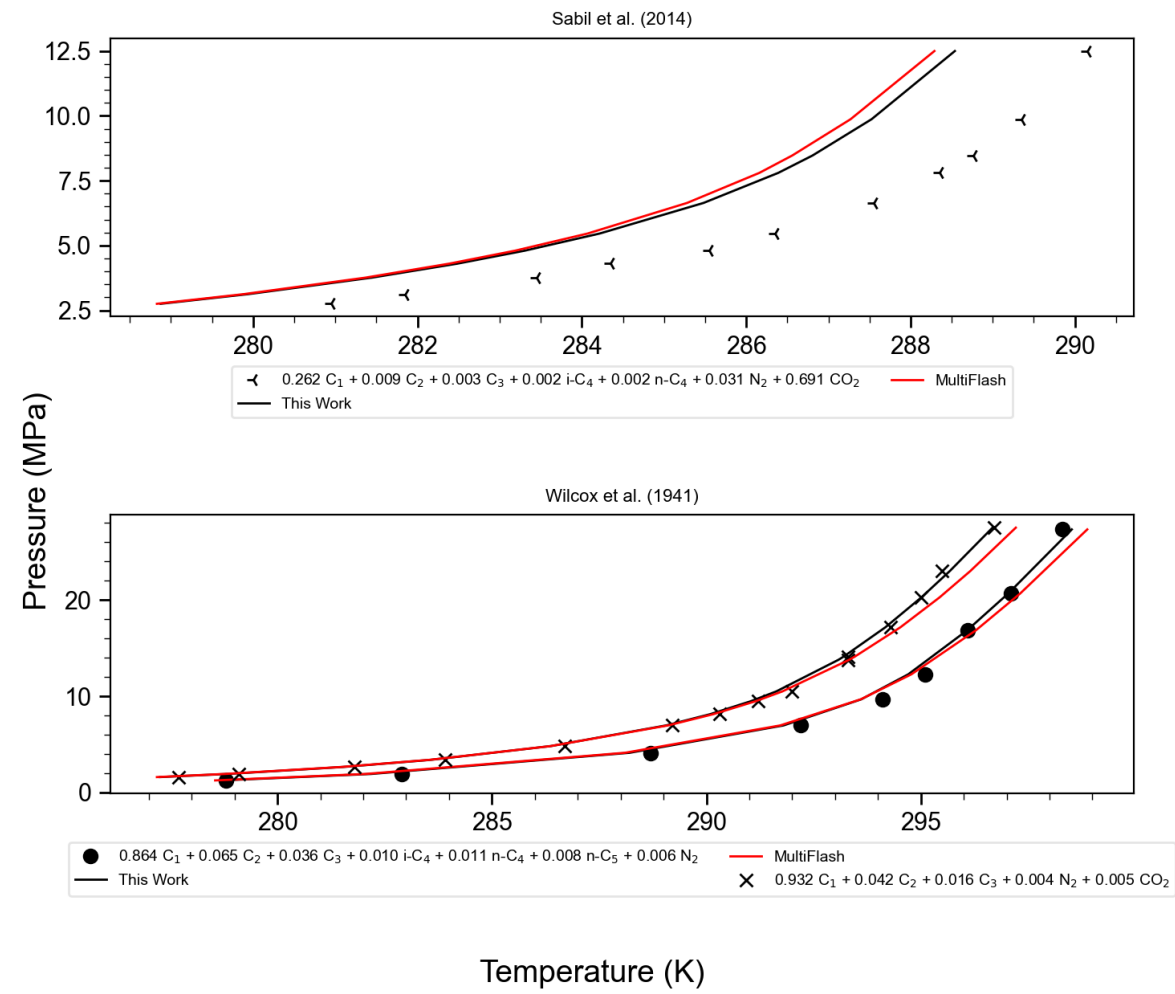

Figure S48: Selected hydrate equilibrium datasets for multicomponent gas mixture hydrates, along with the predictions from two models: the CaSH model (black) and the MultiFlash 7.0 CPA-Hydrates (red). Datasets:<sup>52,192</sup>, with water-free compositions labelled in the figure legends.

### 3.4. Inhibited hydrate equilibria

Table S32: Database of simple methane hydrate equilibria systems inhibited with MEG at varying wt% dosages, with comparison of the AADT of the cavity-based hydrate model with CPAHYD-MF and B&S.

| Reference                                   | MEG wt% | Phases | AADT (K)     | CPAHYD-MF AADT (K) | B&S AADT (K) | $T_{min}$ (K) | $T_{max}$ (K) | $P_{min}$ (MPa) | $P_{max}$ (MPa) | $N$       |
|---------------------------------------------|---------|--------|--------------|--------------------|--------------|---------------|---------------|-----------------|-----------------|-----------|
| Robinson and Ng (1986) <sup>193</sup>       | 10      | Lw-H-V | 0.297        | 0.402              | 0.165        | 270.2         | 287.1         | 2.42            | 15.6            | 4         |
|                                             | 30      | Lw-H-V | 0.705        | 0.506              | 0.183        | 267.6         | 280.1         | 3.77            | 16.38           | 5         |
|                                             | 50      | Lw-H-V | 0.776        | 0.180              | 2.128        | 263.4         | 266.5         | 9.89            | 15.24           | 3         |
| Eichholz et al. (2004) <sup>194</sup>       | 19.16   | Lw-H-V | 0.834        | 0.926              | 0.299        | 266.5         | 279.5         | 2.136           | 8.62            | 3         |
| Mohammadi and Richon (2011a) <sup>195</sup> | 65      | Lw-H-V | 0.802        | 0.750              | 7.517        | 247.4         | 250.7         | 10.38           | 18.32           | 3         |
| Haghighi et al. (2009a) <sup>196</sup>      | 10      | Lw-H-V | 0.046        | 0.121              | 0.112        | 279.4         | 293.95        | 6.379           | 37.448          | 3         |
|                                             | 20      | Lw-H-V | 0.558        | 0.319              | 0.346        | 277.75        | 289.25        | 7.159           | 29.917          | 3         |
|                                             | 30      | Lw-H-V | 0.828        | 0.438              | 0.193        | 273.35        | 284.8         | 6.862           | 31.69           | 3         |
|                                             | 40      | Lw-H-V | 0.972        | 0.362              | 0.605        | 264.95        | 279.05        | 5.055           | 31.386          | 4         |
|                                             | 50      | Lw-H-V | 1.151        | 0.285              | 2.582        | 265.35        | 271.55        | 12.621          | 30.91           | 3         |
| Mohammadi and Richon (2010b) <sup>197</sup> | 6.9     | Lw-H-V | 0.239        | 0.172              | 0.345        | 271.8         | 284.7         | 2.79            | 10.42           | 10        |
|                                             | 10      | Lw-H-V | 0.216        | 0.261              | 0.183        | 271.9         | 283.4         | 2.91            | 9.93            | 5         |
|                                             | 20      | Lw-H-V | 0.827        | 0.844              | 0.396        | 270.4         | 279.8         | 3.06            | 9.41            | 4         |
|                                             | 35      | Lw-H-V | 1.068        | 0.861              | 0.410        | 268.5         | 274.6         | 5.31            | 10.62           | 4         |
|                                             | 50      | Lw-H-V | 0.597        | 0.266              | 1.551        | 258.7         | 263.7         | 5.67            | 10.11           | 4         |
| <b>Overall</b>                              | —       | —      | <b>0.607</b> | <b>0.419</b>       | <b>0.940</b> | <b>247.4</b>  | <b>293.95</b> | <b>2.136</b>    | <b>37.448</b>   | <b>61</b> |



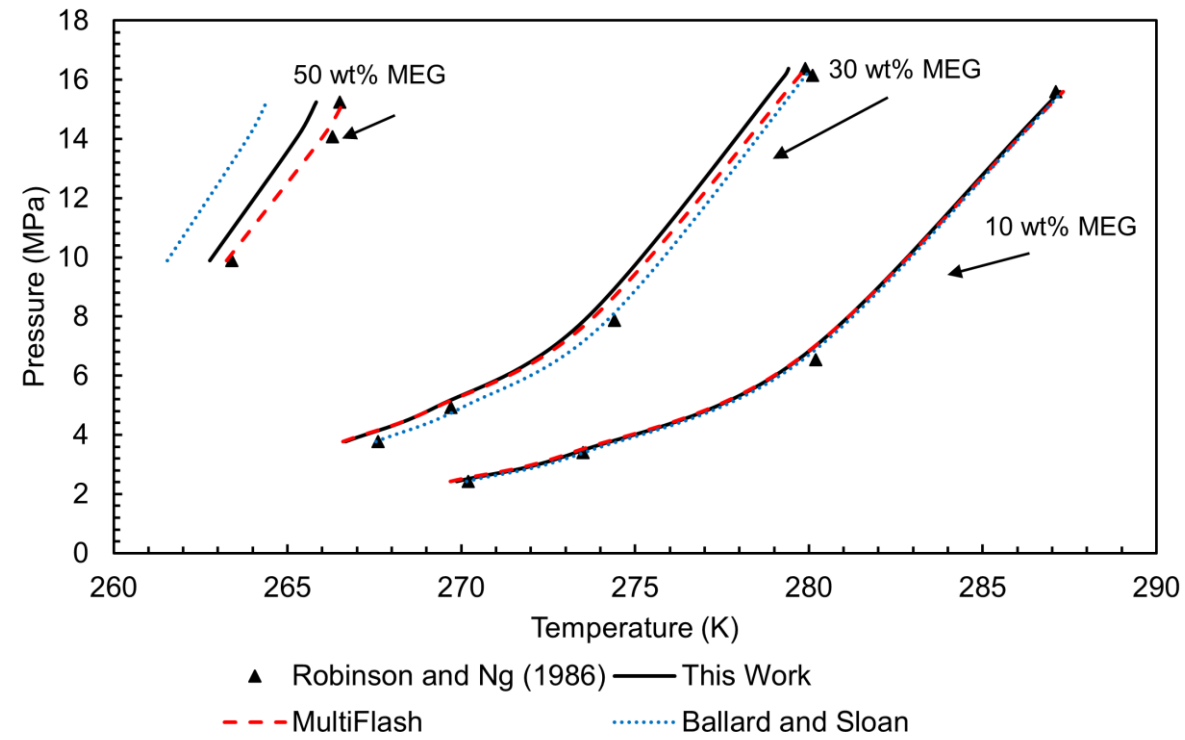

Figure S49: Selected hydrate equilibrium datasets for methane simple hydrates inhibited with MEG at varying wt%, along with the predictions from three models: the CaSH model (black), MultiFlash 7.0 CPA-Hydrates (red-dashed), and Ballard and Sloan (blue-dotted). Datasets:<sup>193</sup>

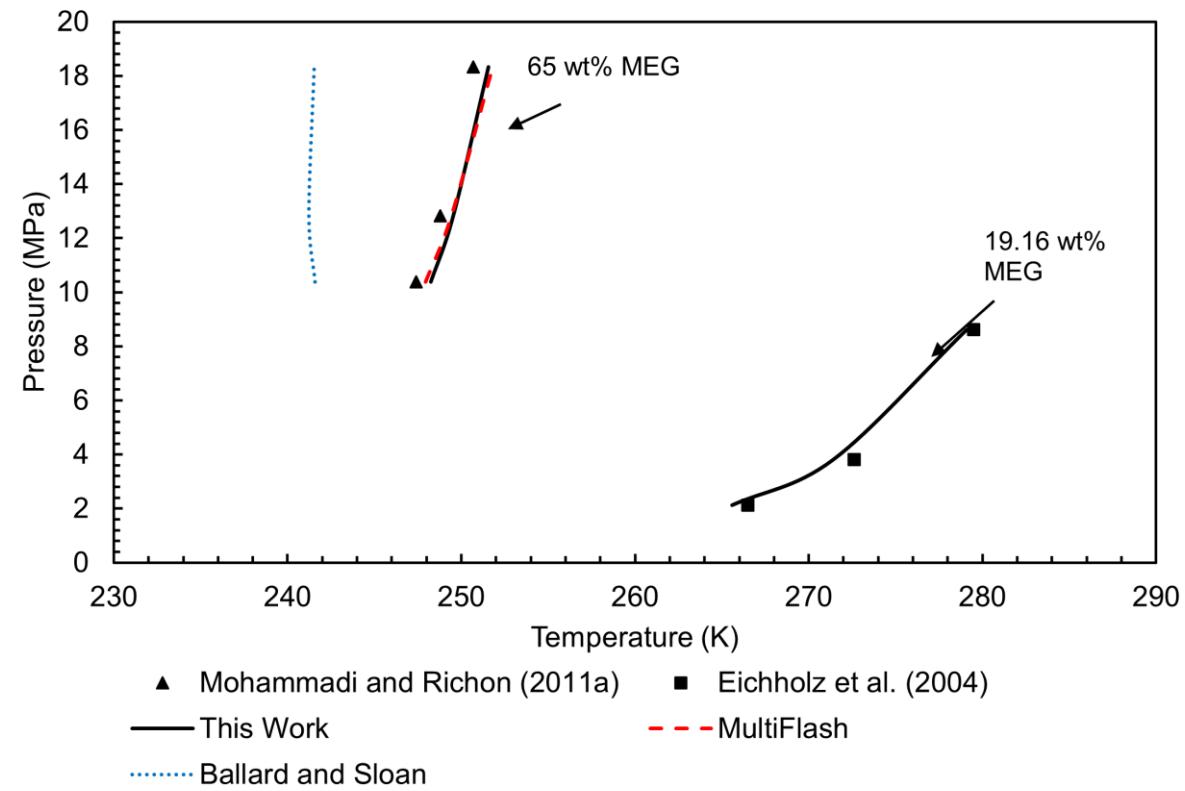

Figure S50: Selected hydrate equilibrium datasets for methane simple hydrates inhibited with MEG at varying wt%, along with the predictions from three models: the CaSH model (black), MultiFlash 7.0 CPA-Hydrates (red-dashed), and Ballard and Sloan (blue-dotted). Datasets:<sup>194,195</sup>

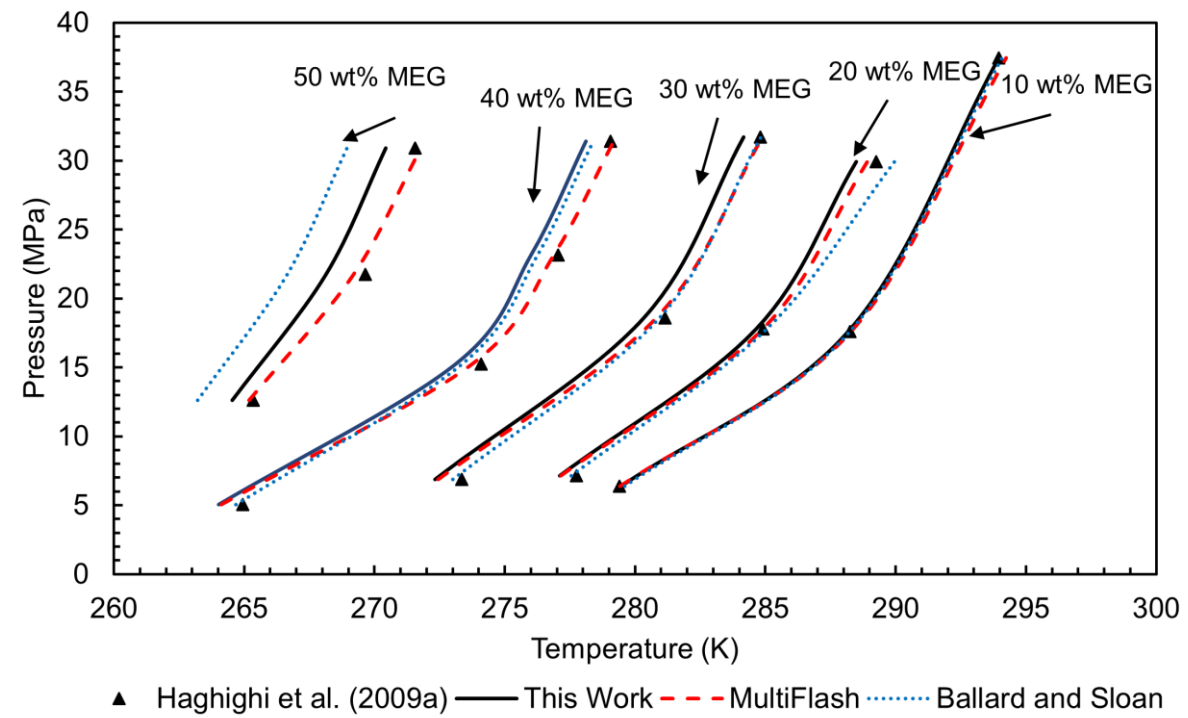

Figure S51: Selected hydrate equilibrium datasets for methane simple hydrates inhibited with MEG at varying wt%, along with the predictions from three models: the CaSH model (black), MultiFlash 7.0 CPA-Hydrates (red-dashed), and Ballard and Sloan (blue-dotted). Datasets:<sup>196</sup>

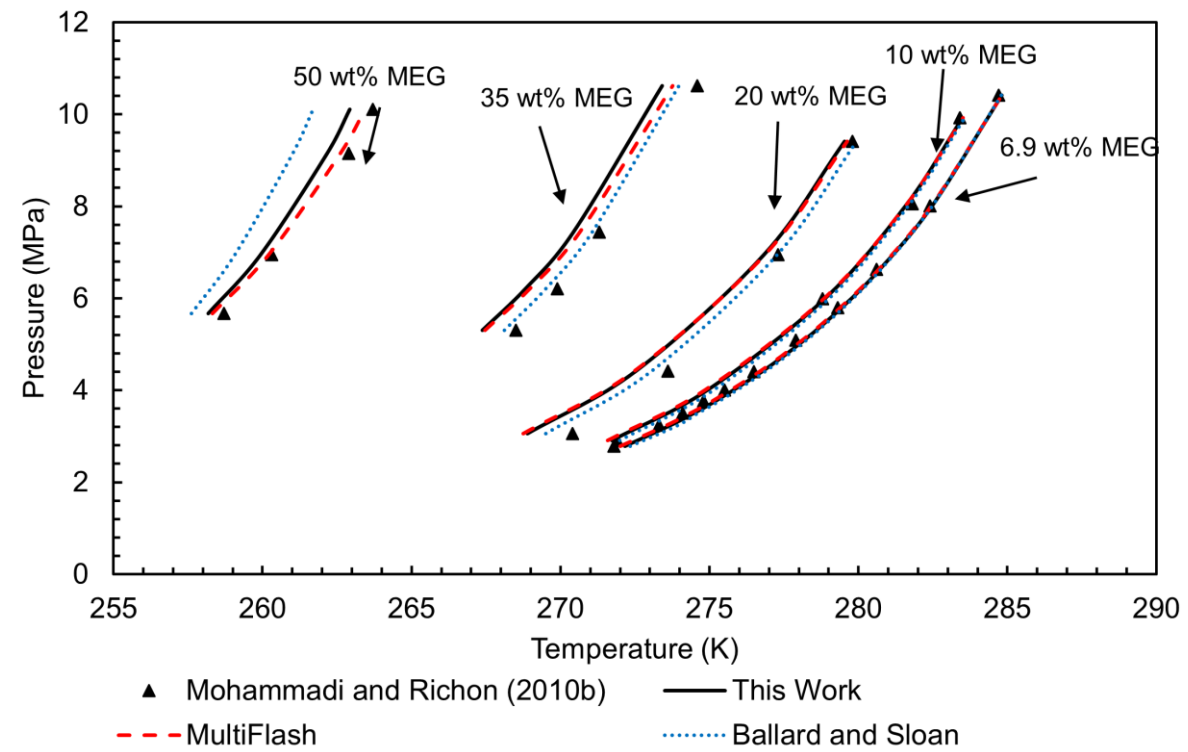

Figure S52: Selected hydrate equilibrium datasets for methane simple hydrates inhibited with MEG at varying wt%, along with the predictions from three models: the CaSH model (black), MultiFlash 7.0 CPA-Hydrates (red-dashed), and Ballard and Sloan (blue-dotted). Datasets:<sup>197</sup>

Table S33: Database of binary-gas-mixture hydrate equilibrium systems inhibited with MEG at varying wt% dosages, with comparison of the AADT of the cavity-based hydrate model with CPAHYD-MF and B&S.

| Reference                                  | Mixtures                                        | MEG wt% | Phases | AADT (K)     | MF AADT (K)  | CSMGem AADT (K) | $T_{min}$ (K) | $T_{max}$ (K) | $P_{min}$ (MPa) | $P_{max}$ (MPa) | $x_{1+min}$ | $x_{1+max}$ | $N$       |
|--------------------------------------------|-------------------------------------------------|---------|--------|--------------|--------------|-----------------|---------------|---------------|-----------------|-----------------|-------------|-------------|-----------|
| Fan et al. (2000) <sup>88</sup>            | CH <sub>4</sub> + CO <sub>2</sub>               | 10      | Lw-H-V | 1.214        | 1.190        | 1.192           | 268.7         | 278           | 1.14            | 3.22            | 0.0348      | 0.0348      | 4         |
|                                            | N <sub>2</sub> + CO <sub>2</sub>                | 10      | Lw-H-V | 0.549        | 0.542        | 0.416           | 268.9         | 276.1         | 1               | 2.49            | 0.0348      | 0.0348      | 4         |
|                                            | C <sub>2</sub> H <sub>6</sub> + CO <sub>2</sub> | 10.6    | Lw-H-V | 0.802        | 0.659        | 0.737           | 269.1         | 276.4         | 0.85            | 2.31            | 0.0531      | 0.0531      | 5         |
|                                            | N <sub>2</sub> + CO <sub>2</sub>                | 13.01   | Lw-H-V | 0.791        | 0.736        | 0.555           | 267.2         | 276.5         | 0.93            | 3.39            | 0.0901      | 0.0901      | 8         |
| Hemmingsen et al. (2011) <sup>134</sup>    | CH <sub>4</sub> + C <sub>3</sub> H <sub>8</sub> | 40      | Lw-H-V | 1.297        | 1.428        | 0.985           | 267.95        | 283.35        | 1.22            | 13.33           | 0.8813      | 0.8813      | 3         |
|                                            | CH <sub>4</sub> + C <sub>3</sub> H <sub>8</sub> | 50      | Lw-H-V | 1.660        | 1.618        | 3.147           | 267.95        | 277.45        | 2.25            | 17.49           | 0.8813      | 0.8813      | 3         |
|                                            | CH <sub>4</sub> + C <sub>3</sub> H <sub>8</sub> | 60      | Lw-H-V | 0.861        | 1.067        | 6.200           | 258.85        | 267.85        | 2.36            | 17.27           | 0.8813      | 0.8813      | 3         |
| Dholabhai et al. (1997) <sup>198</sup>     | CH <sub>4</sub> + CO <sub>2</sub>               | 10      | Lw-H-V | 0.242        | 0.396        | 0.120           | 269.57        | 281.22        | 1.92            | 6.318           | 0.813       | 0.858       | 3         |
|                                            | CH <sub>4</sub> + CO <sub>2</sub>               | 30      | Lw-H-V | 0.962        | 1.030        | 0.440           | 264.78        | 277.17        | 2.428           | 9.167           | 0.815       | 0.864       | 3         |
| Aminolroayaei et al. (2022) <sup>199</sup> | CH <sub>4</sub> + H <sub>2</sub> S              | 10      | Lw-H-V | 0.717        | 0.655        | 0.817           | 280.55        | 286.05        | 6.56            | 12.29           | 0.99        | 0.99        | 4         |
|                                            | CH <sub>4</sub> + H <sub>2</sub> S              | 15      | Lw-H-V | 0.149        | 0.118        | 0.387           | 281.58        | 284.67        | 8.16            | 12              | 0.99        | 0.99        | 3         |
|                                            | CH <sub>4</sub> + H <sub>2</sub> S              | 20      | Lw-H-V | 0.721        | 0.732        | 1.169           | 276.65        | 282.65        | 6.28            | 11.78           | 0.99        | 0.99        | 4         |
| <b>Overall</b>                             | —                                               | —       | —      | <b>0.823</b> | <b>0.822</b> | <b>1.199</b>    | <b>258.85</b> | <b>286.05</b> | <b>0.85</b>     | <b>17.49</b>    | —           | —           | <b>47</b> |

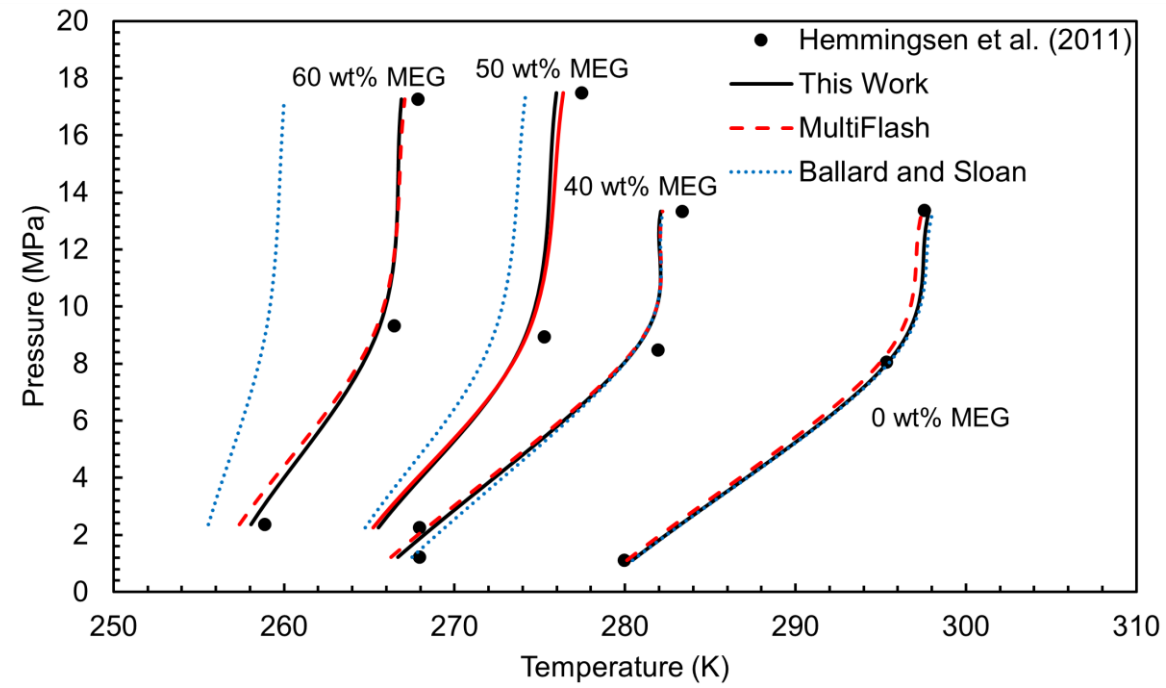

Figure S53: Selected hydrate equilibrium datasets for binary-gas mixture hydrates inhibited with MEG at varying wt%, along with the predictions from three models: the CaSH model (black), MultiFlash 7.0 CPA-Hydrates (red-dashed), and Ballard and Sloan (blue-dotted). Datasets:<sup>134</sup> - 0.8813 CH<sub>4</sub> + 0.1187 C<sub>3</sub>H<sub>8</sub> (water-free molar composition)

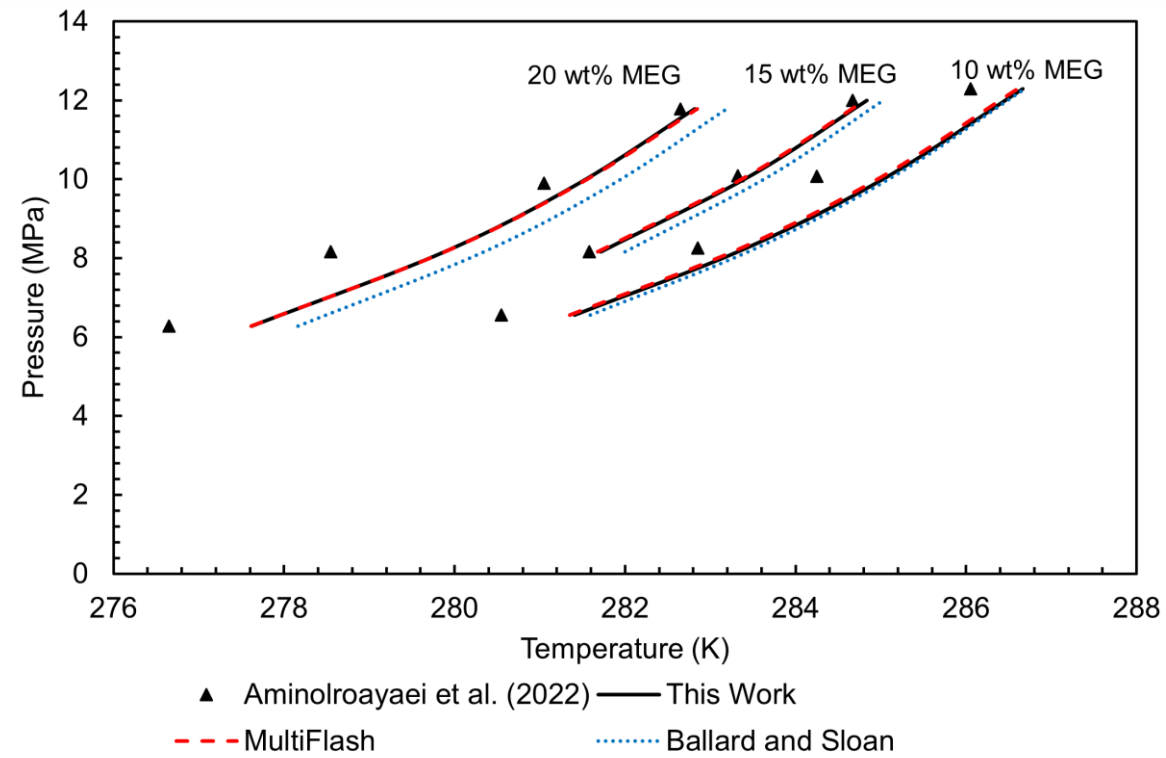

Figure S54: Selected hydrate equilibrium datasets for binary-gas mixture hydrates inhibited with MEG at varying wt%, along with the predictions from three models: the CaSH model (black), MultiFlash 7.0 CPA-Hydrates (red-dashed), and Ballard and Sloan (blue-dotted). Datasets:<sup>199</sup> - 0.99 CH<sub>4</sub> + 0.01 H<sub>2</sub>S (water-free molar composition)

Table S34: Database of multicomponent gas mixture hydrate equilibria systems inhibited with MEG at varying wt % dosages, with comparison of the AADT of the cavity-based hydrate model with CPAHYD-MF and B&S.

| Reference                                     | Mixtures                                                                                                                                                                                                                                                                                                                             | MEG<br>wt% | Phases     | AADT<br>(K) | MF AADT<br>(K) | CSMGem AADT<br>(K) | T <sub>min</sub><br>(K) | T <sub>max</sub><br>(K) | P <sub>min</sub><br>(MPa) | P <sub>max</sub><br>(MPa) | N |
|-----------------------------------------------|--------------------------------------------------------------------------------------------------------------------------------------------------------------------------------------------------------------------------------------------------------------------------------------------------------------------------------------|------------|------------|-------------|----------------|--------------------|-------------------------|-------------------------|---------------------------|---------------------------|---|
| Cha et al. (2013) <sup>188</sup>              | CH <sub>4</sub> + C <sub>2</sub> H <sub>6</sub> + C <sub>3</sub> H <sub>8</sub> + n-C <sub>4</sub> H <sub>10</sub>                                                                                                                                                                                                                   | 10         | Lw-H-<br>V | 1.124       | 1.185          | 3.084              | 286.8                   | 291.7                   | 4.8                       | 10                        | 3 |
|                                               | CH <sub>4</sub> + C <sub>2</sub> H <sub>6</sub> + C <sub>3</sub> H <sub>8</sub> + n-C <sub>4</sub> H <sub>10</sub>                                                                                                                                                                                                                   | 30         | Lw-H-<br>V | 1.762       | 1.703          | 3.434              | 281.5                   | 284.9                   | 5                         | 11.4                      | 3 |
|                                               | CH <sub>4</sub> + C <sub>2</sub> H <sub>6</sub> + C <sub>3</sub> H <sub>8</sub> + n-C <sub>4</sub> H <sub>10</sub>                                                                                                                                                                                                                   | 50         | Lw-H-<br>V | 0.804       | 0.602          | 4.809              | 269.7                   | 271.9                   | 5.7                       | 11.4                      | 4 |
| Fan et al. (2000) 10 wt%<br>MEG <sup>88</sup> | CH <sub>4</sub> + C <sub>2</sub> H <sub>6</sub> + N <sub>2</sub> + CO <sub>2</sub>                                                                                                                                                                                                                                                   | 10         | Lw-H-<br>V | 1.825       | 1.826          | 1.672              | 268.8                   | 279.3                   | 0.8                       | 3.5                       | 6 |
| Haghighi et al. (2009) <sup>200</sup>         | N <sub>2</sub> + CO <sub>2</sub> + CH <sub>4</sub> + C <sub>2</sub> H <sub>6</sub> + C <sub>3</sub> H <sub>8</sub> + i-C <sub>4</sub> H <sub>10</sub> + n-C <sub>4</sub> H <sub>10</sub> + i-C <sub>5</sub> H <sub>12</sub> + n-C <sub>5</sub> H <sub>12</sub> + n-C <sub>6</sub> H <sub>14</sub> + n-C <sub>7</sub> H <sub>16</sub> | 10         | Lw-H-<br>V | 0.062       | 0.194          | 0.369              | 280.25                  | 292.75                  | 2.78                      | 20.26                     | 3 |
|                                               | N <sub>2</sub> + CO <sub>2</sub> + CH <sub>4</sub> + C <sub>2</sub> H <sub>6</sub> + C <sub>3</sub> H <sub>8</sub> + i-C <sub>4</sub> H <sub>10</sub> + n-C <sub>4</sub> H <sub>10</sub> + i-C <sub>5</sub> H <sub>12</sub> + n-C <sub>5</sub> H <sub>12</sub> + n-C <sub>6</sub> H <sub>14</sub> + n-C <sub>7</sub> H <sub>16</sub> | 30         | Lw-H-<br>V | 0.535       | 0.247          | 0.488              | 276.55                  | 287.45                  | 3.999                     | 29.82                     | 4 |
|                                               | N <sub>2</sub> + CO <sub>2</sub> + CH <sub>4</sub> + C <sub>2</sub> H <sub>6</sub> + C <sub>3</sub> H <sub>8</sub> + i-C <sub>4</sub> H <sub>10</sub> + n-C <sub>4</sub> H <sub>10</sub> + i-C <sub>5</sub> H <sub>12</sub> + n-C <sub>5</sub> H <sub>12</sub>                                                                       | 50         | Lw-H-<br>V | 0.762       | 0.876          | 2.036              | 258.85                  | 275.15                  | 1.855                     | 35.763                    | 4 |
| Lee and Kang (2011) <sup>190</sup>            | CH <sub>4</sub> + C <sub>2</sub> H <sub>6</sub> + C <sub>3</sub> H <sub>8</sub> + i-C <sub>4</sub> H <sub>10</sub> + n-C <sub>4</sub> H <sub>10</sub> + N <sub>2</sub>                                                                                                                                                               | 10         | Lw-H-<br>V | 0.765       | 0.686          | 1.009              | 275.7                   | 289.2                   | 1.52                      | 8.22                      | 5 |
|                                               | CH <sub>4</sub> + C <sub>2</sub> H <sub>6</sub> + C <sub>3</sub> H <sub>8</sub> + i-C <sub>4</sub> H <sub>10</sub> + n-C <sub>4</sub> H <sub>10</sub> + N <sub>2</sub>                                                                                                                                                               | 20         | Lw-H-<br>V | 0.262       | 0.338          | 0.254              | 271.1                   | 287.7                   | 1.09                      | 9.2                       | 5 |
|                                               | CH <sub>4</sub> + C <sub>2</sub> H <sub>6</sub> + C <sub>3</sub> H <sub>8</sub> + i-C <sub>4</sub> H <sub>10</sub> + n-C <sub>4</sub> H <sub>10</sub> + N <sub>2</sub>                                                                                                                                                               | 30         | Lw-H-<br>V | 0.472       | 0.448          | 0.627              | 266.2                   | 283.7                   | 0.99                      | 8.64                      | 5 |
|                                               | CH <sub>4</sub> + C <sub>2</sub> H <sub>6</sub> + C <sub>3</sub> H <sub>8</sub> + i-C <sub>4</sub> H <sub>10</sub> + n-C <sub>4</sub> H <sub>10</sub> + N <sub>2</sub>                                                                                                                                                               | 40         | Lw-H-<br>V | 1.974       | 1.832          | 2.388              | 261.2                   | 275.8                   | 1.28                      | 8.15                      | 5 |
|                                               | CH <sub>4</sub> + C <sub>2</sub> H <sub>6</sub> + C <sub>3</sub> H <sub>8</sub> + i-C <sub>4</sub> H <sub>10</sub> + n-C <sub>4</sub> H <sub>10</sub> + N <sub>2</sub>                                                                                                                                                               | 50         | Lw-H-<br>V | 1.308       | 1.385          | 0.555              | 264.6                   | 270.2                   | 4.04                      | 9.21                      | 4 |
| Nasir et al. (2014) <sup>201</sup>            | CH <sub>4</sub> + C <sub>2</sub> H <sub>6</sub> + C <sub>3</sub> H <sub>8</sub> + i-C <sub>4</sub> H <sub>10</sub> + n-C <sub>4</sub> H <sub>10</sub> + N <sub>2</sub> + CO <sub>2</sub>                                                                                                                                             | 10         | Lw-H-<br>V | 0.259       | 0.304          | 0.201              | 278.15                  | 284.75                  | 3.21                      | 10.06                     | 5 |
|                                               | CH <sub>4</sub> + C <sub>2</sub> H <sub>6</sub> + C <sub>3</sub> H <sub>8</sub> + i-C <sub>4</sub> H <sub>10</sub> + n-C <sub>4</sub> H <sub>10</sub> + N <sub>2</sub> + CO <sub>2</sub>                                                                                                                                             | 20         | Lw-H-<br>V | 0.440       | 0.570          | 0.352              | 276.15                  | 282.05                  | 3.58                      | 10.82                     | 5 |



| Reference                          | Mixtures                                                                                                                                                                                 | MEG wt% | Phases | AADT (K)     | MF AADT (K)  | CSMGem AADT (K) | T <sub>min</sub> (K) | T <sub>max</sub> (K) | P <sub>min</sub> (MPa) | P <sub>max</sub> (MPa) | N         |
|------------------------------------|------------------------------------------------------------------------------------------------------------------------------------------------------------------------------------------|---------|--------|--------------|--------------|-----------------|----------------------|----------------------|------------------------|------------------------|-----------|
| Saberi et al. (2018) <sup>51</sup> | CH <sub>4</sub> + C <sub>2</sub> H <sub>6</sub> + C <sub>3</sub> H <sub>8</sub> + i-C <sub>4</sub> H <sub>10</sub> + n-C <sub>4</sub> H <sub>10</sub> + N <sub>2</sub> + CO <sub>2</sub> | 10      | Lw-H-V | 0.739        | 0.790        | 1.007           | 290.2                | 292.1                | 6.03                   | 8.34                   | 4         |
|                                    | CH <sub>4</sub> + C <sub>2</sub> H <sub>6</sub> + C <sub>3</sub> H <sub>8</sub> + i-C <sub>4</sub> H <sub>10</sub> + n-C <sub>4</sub> H <sub>10</sub> + N <sub>2</sub> + CO <sub>2</sub> | 20      | Lw-H-V | 1.318        | 1.345        | 1.445           | 287.3                | 289.6                | 5.87                   | 8.91                   | 4         |
| <b>Overall</b>                     | —                                                                                                                                                                                        | —       | —      | <b>0.913</b> | <b>0.899</b> | <b>1.404</b>    | <b>258.85</b>        | <b>292.75</b>        | <b>0.8</b>             | <b>35.763</b>          | <b>70</b> |

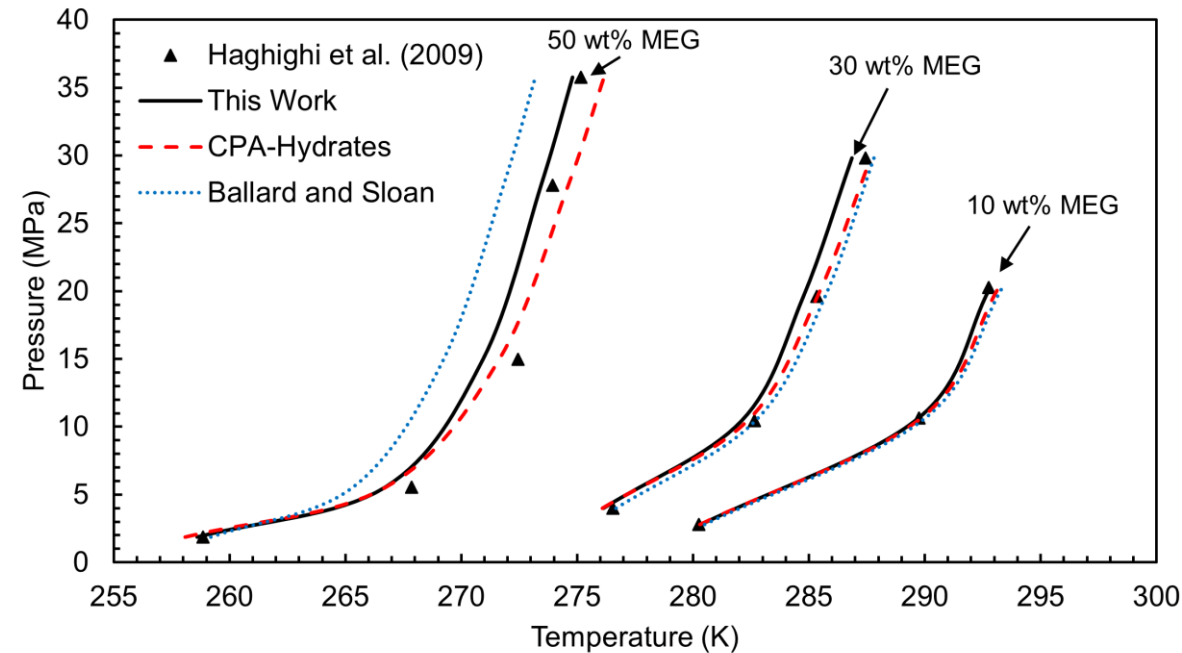

Figure S55: Experimental hydrate equilibrium data of a multicomponent gas mixture at different wt% of MEG, alongside predictions from the CaSH model (black), MultiFlash 7.0 CPA-Hydrates (red-dashed), and Ballard and Sloan (blue-dotted). (Note - Same as Figure S10 in main manuscript) Dataset:<sup>196</sup> - water-free molar composition (10 wt% MEG, 30 wt% MEG): 0.8821 CH<sub>4</sub> + 0.0578 C<sub>2</sub>H<sub>6</sub> + 0.0178 C<sub>3</sub>H<sub>8</sub> + 0.0019 i-C<sub>4</sub>H<sub>10</sub> + 0.0006 i-C<sub>5</sub>H<sub>12</sub> + 0.0007 n-C<sub>5</sub>H<sub>12</sub> + 0.0001 n-C<sub>7</sub>H<sub>16</sub> + 0.014 N<sub>2</sub> + 0.0215 CO<sub>2</sub>; (50 wt% MEG): 0.883 CH<sub>4</sub> + 0.054 C<sub>2</sub>H<sub>6</sub> + 0.015 C<sub>3</sub>H<sub>8</sub> + 0.002 i-C<sub>4</sub>H<sub>10</sub> + 0.003 n-C<sub>4</sub>H<sub>10</sub> + 0.001 i-C<sub>5</sub>H<sub>12</sub> + 0.0009 n-C<sub>5</sub>H<sub>12</sub> + 0.0239 N<sub>2</sub> + 0.0172 CO<sub>2</sub>

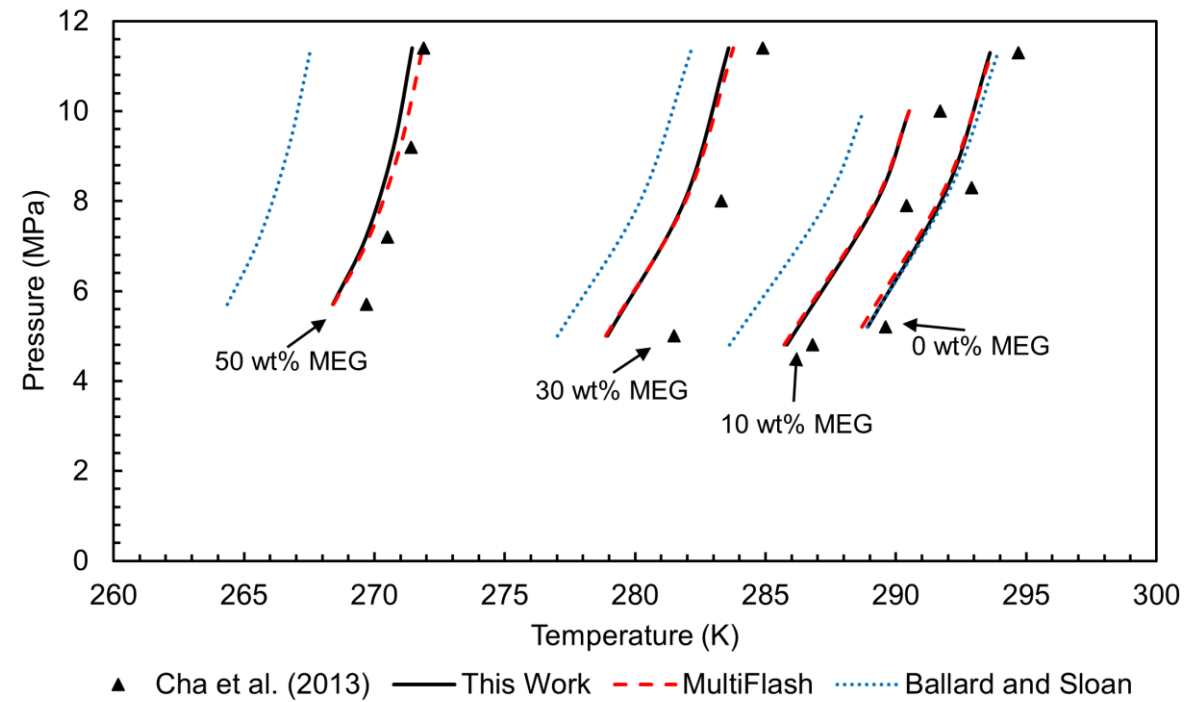

Figure S56: Experimental hydrate equilibrium data of a multicomponent gas mixture at different wt% of MEG, alongside predictions from the CaSH model (black), MultiFlash 7.0 CPA-Hydrates (red-dashed), and Ballard and Sloan (blue-dotted). Dataset:<sup>188</sup> - water-free molar composition:  $0.9 \text{ CH}_4 + 0.06 \text{ C}_2\text{H}_6 + 0.03 \text{ C}_3\text{H}_8 + 0.01 \text{ n-C}_4\text{H}_{10}$

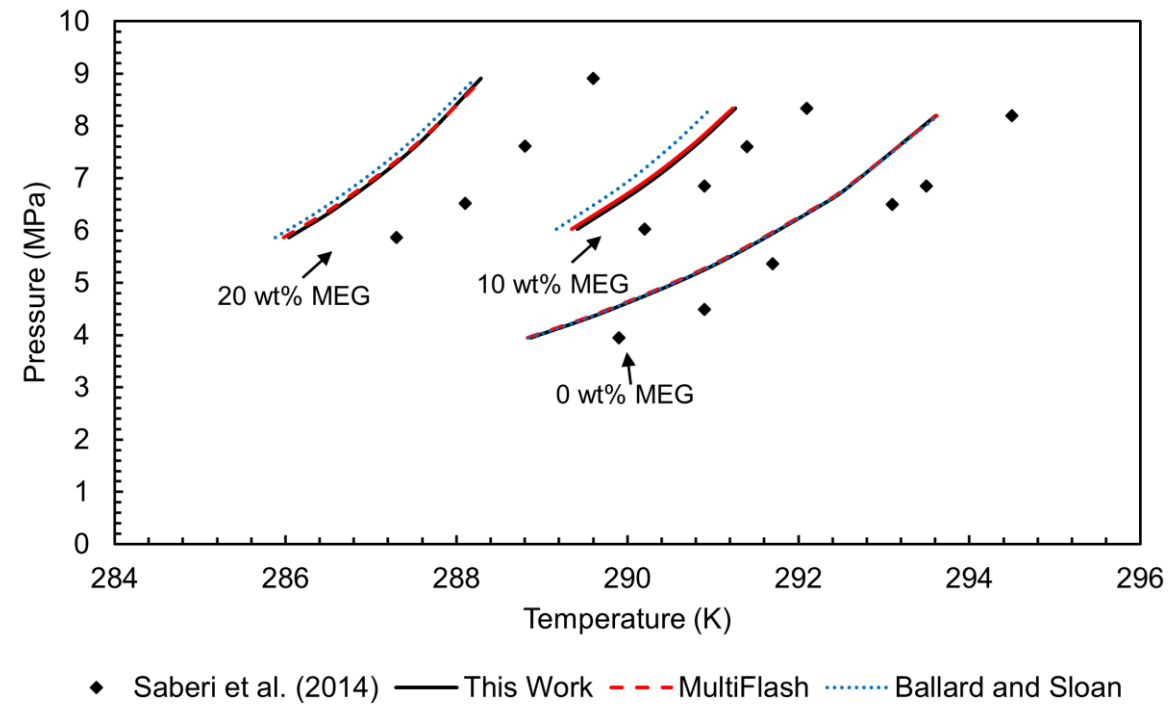

Figure S57: Experimental hydrate equilibrium data of a multicomponent gas mixture at different wt% of MEG, alongside predictions from the CaSH model (black), MultiFlash 7.0 CPA-Hydrates (red-dashed), and Ballard and Sloan (blue-dotted). Dataset:<sup>51</sup> - water-free molar composition:  $0.804 \text{ CH}_4 + 0.103 \text{ C}_2\text{H}_6 + 0.05 \text{ C}_3\text{H}_8 + 0.0165 \text{ i-C}_4\text{H}_{10} + 0.0072 \text{ n-C}_4\text{H}_{10} + 0.0011 \text{ N}_2 + 0.0182 \text{ CO}_2$

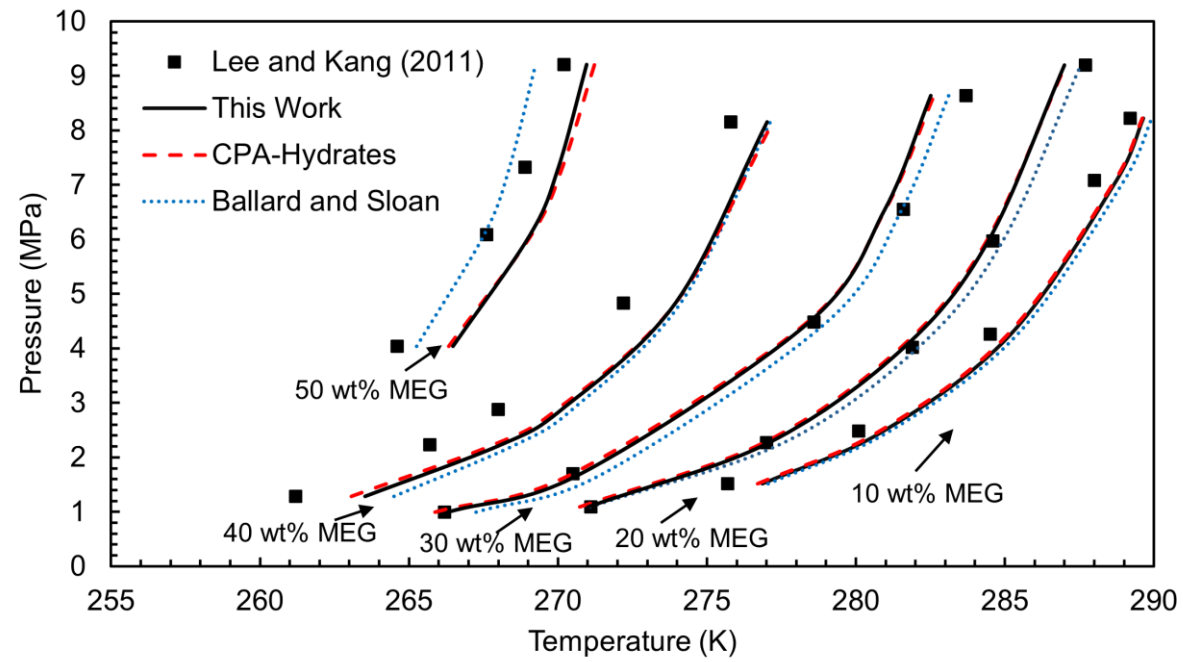

Figure S58: Experimental hydrate equilibrium data of a multicomponent gas mixture at different wt% of MEG, alongside predictions from the CaSH model (black), MultiFlash 7.0 CPA-Hydrates (red-dashed), and Ballard and Sloan (blue-dotted). Dataset:<sup>190</sup> - water-free molar composition:  $0.8986 \text{ CH}_4 + 0.064 \text{ C}_2\text{H}_6 + 0.0271 \text{ C}_3\text{H}_8 + 0.0048 \text{ i-C}_4\text{H}_{10} + 0.0049 \text{ n-C}_4\text{H}_{10} + 0.0004 \text{ N}_2$

## References

- 1 M. Michelsen and J. Mollerup, *Thermodynamic modelling: Fundamentals and computational aspects*, 2007.
- 2 G. M. Kontogeorgis and G. K. Folas, [\*Thermodynamic models for industrial applications\*](#), John Wiley & Sons, Ltd, Chichester, UK, 2010.
- 3 M. L. Michelsen and E. M. Hendriks, [\*Physical properties from association models\*](#), *Fluid Phase Equilibria*, 2001, **180**, 165–174.
- 4 A. L. Ballard, PhD Thesis, Colorado School of Mines, 2002.
- 5 A. L. Ballard and J. D. Sloan, [\*The next generation of hydrate prediction: An overview\*](#), *Journal of Supramolecular Chemistry*, 2002, **2**, 385–392.
- 6 S. Hielscher, PhD thesis, Fakultät für Maschinenbau der Ruhr-Universität Bochum, 2019.
- 7 S. Hielscher, B. Semrau, A. Jäger, V. Vinš, C. Bretkopf, J. Hrubý and R. Span, [\*Modification of a model for mixed hydrates to represent double cage occupancy\*](#), *Fluid Phase Equilibria*, 2019, **490**, 48–60.
- 8 S. Adisasmito, R. J. Frank and E. D. Sloan, [\*Hydrates of carbon dioxide and methane mixtures\*](#), *Journal of Chemical and Engineering Data*, 1991, **36**, 68–71.
- 9 M. Aghajanloo, Z. Taheri, T. J. Behbahani, A. H. Mohammadi, M. R. Ehsani and H. Heydarian, [\*Experimental determination and thermodynamic modeling of clathrate hydrate stability conditions in methane + hydrogen sulfide + water system\*](#), *Journal of Natural Gas Science and Engineering*, 2020, **83**, 103549.
- 10 C. Blanc and J. (Elf. A. (FR)). Tornier-Lasserve, Controlling hydrates in high-pressure flowlines, *World Oil*, 1990, **211**, 63 et seq.

- 11 A. Böttger, Á. P.-S. Kamps and G. Maurer, [An experimental investigation of the phase equilibrium of the binary system \(methane+water\) at low temperatures: Solubility of methane in water and three-phase \(vapour+liquid+hydrate\) equilibrium](#), *Fluid Phase Equilibria*, 2016, **407**, 209–216.
- 12 L. CHEN, C. SUN, G. CHEN, Y. NIE, Z. SUN and Y. LIU, [Measurements of hydrate equilibrium conditions for CH<sub>4</sub>, CO<sub>2</sub>, and CH<sub>4</sub> + C<sub>2</sub>H<sub>6</sub> + C<sub>3</sub>H<sub>8</sub> in various systems by step-heating method](#), *Chinese Journal of Chemical Engineering*, 2009, **17**, 635–641.
- 13 M. Clarke and P. R. Bishnoi, [Determination of the activation energy and intrinsic rate constant of methane gas hydrate decomposition](#), *Canadian Journal of Chemical Engineering*, 2001, **79**, 143–147.
- 14 D. É. S. de Menezes, P. de A. Pessôa Filho and M. D. Robustillo Fuentes, Phase equilibrium for methane, ethane and carbon dioxide hydrates at pressures up to 100 MPa through high-pressure microcalorimetry: Experimental data, analysis and modeling, *Fluid Phase Equilibria*, DOI:[10.1016/j.fluid.2020.112590](#).
- 15 J. L. De Roo, C. J. Peters, R. N. Lichtenthaler and G. A. M. Diepen, [Occurrence of methane hydrate in saturated and unsaturated solutions of sodium chloride and water in dependence of temperature and pressure](#), *AIChE Journal*, 1983, **29**, 651–657.
- 16 E. M. Frost Jr and W. M. Deaton, Gas hydrate composition and equilibrium data.[direct and calculated measurements are in close agreement; CO/sub 2/, CH/sub 4/, c/sub 2/h/sub 6/, c/sub 3/h/sub 8/used], *Oil Gas J.:(United States)*.
- 17 Y. Deng, X. Xu and L. Zhang, in *Permafrost sixth internaional conference*, Beijing, China, 1993.
- 18 G. R. Dickens and M. S. Quinby-Hunt, [Methane hydrate stability in seawater](#), *Geophysical Research Letters*, 1994, **21**, 2115–2118.
- 19 Yu. A. Dyadin and E. Y. Aladko, in *International conference on natural gas hydrates*, Toulouse, France, 1996, pp. 67–70.

- 20 T. J. Galloway, W. Ruska, P. S. Chappellear and R. Kobayashi, [Experimental measurement of hydrate numbers for methane and ethane and comparison with theoretical values](#), *Industrial and Engineering Chemistry Fundamentals*, 1970, **9**, 237–243.
- 21 P. Gayet, C. Dicharry, G. Marion, A. Graciaa, J. Lachaise and A. Nesterov, [Experimental determination of methane hydrate dissociation curve up to 55MPa by using a small amount of surfactant as hydrate promoter](#), *Chemical Engineering Science*, 2005, **60**, 5751–5758.
- 22 R. L. Guo, G. B., Bretz, R. E., Lee and R. L. Guo, G. B., Bretz, R.E., Lee, in *International gas research conference*, Orlando, Florida, 1992, pp. 231–240.
- 23 A. Hachikubo, A. Miyamoto, K. Hyakutake, K. Abe and H. Shoji, in *Fourth international conference on gas hydrates, japan*, 2002, pp. 357–360.
- 24 Y. Hu, T. Y. Makogon, P. Karanjkar, K.-H. H. Lee, B. R. Lee, A. K. Sum, T. Y. Makogon, P. Karanjkar, K.-H. H. Lee, B. R. Lee and A. K. Sum, [Gas hydrates phase equilibria and formation from high concentration NaCl brines up to 200 MPa](#), *Journal of Chemical and Engineering Data*, 2017, **62**, 1910–1918.
- 25 Y. Hu, B. R. Lee and A. K. Sum, [Universal correlation for gas hydrates suppression temperature of inhibited systems: I. Single salts](#), *AIChE Journal*, 2017, **63**, 5111–5124.
- 26 U. Hütz and P. Englezos, Measurement of structure h hydrate phase equilibrium and the effect of electrolytes, *Fluid Phase Equilibria*, 1996, **117**, 178–185.
- 27 M. D. Jager, PhD thesis, Colarado School of Mines, 2001.
- 28 M. D. Jager and E. D. Sloan, [The effect of pressure on methane hydration in pure water and sodium chloride solutions](#), *Fluid Phase Equilibria*, 2001, **185**, 89–99.

- 29 J. Javanmardi, S. Babae, A. Eslamimanesh and A. H. Mohammadi, [Experimental measurements and predictions of gas hydrate dissociation conditions in the presence of methanol and ethane-1,2-diol aqueous solutions](#), *Journal of Chemical and Engineering Data*, 2012, **57**, 1474–1479.
- 30 J. Jhaveri and D. B. Robinson, [Hydrates in the methane-nitrogen system](#), *The Canadian Journal of Chemical Engineering*, 1965, **43**, 75–78.
- 31 A. Kamari, H. Hashemi, S. Babae, A. H. Mohammadi and D. Ramjugernath, [Phase stability conditions of carbon dioxide and methane clathrate hydrates in the presence of KBr, CaBr<sub>2</sub>, MgCl<sub>2</sub>, HCOONa, and HCOOK aqueous solutions: Experimental measurements and thermodynamic modelling](#), *Journal of Chemical Thermodynamics*, 2017, **115**, 307–317.
- 32 M. Kharrat and D. Dalmazzone, [Experimental determination of stability conditions of methane hydrate in aqueous calcium chloride solutions using high pressure differential scanning calorimetry](#), *Journal of Chemical Thermodynamics*, 2003, **35**, 1489–1505.
- 33 R. Kobayashi and D. L. Katz, Methane hydrate at high pressure, *Journal of Petroleum Technology*, 1949, **1**, 66–70.
- 34 T. Komai, Y. Yamamoto and S. Ikegami, in *Fuel chemistry symposium on gas hydrates*, American Chemical Society, San Francisco, CA, USA, 1997, pp. 568–572.
- 35 P. G. Lafond, K. A. Olcott, E. Dendy Sloan, C. A. Koh and A. K. Sum, [Measurements of methane hydrate equilibrium in systems inhibited with NaCl and methanol](#), *Journal of Chemical Thermodynamics*, 2012, **48**, 1–6.
- 36 D. Lim, H. Ro, Y. Seo, Y. ju Seo, J. Y. Lee, S. J. Kim, J. Lee and H. Lee, [Thermodynamic stability and guest distribution of CH<sub>4</sub>/N<sub>2</sub>/CO<sub>2</sub> mixed hydrates for methane hydrate production using N<sub>2</sub>/CO<sub>2</sub> injection](#), *Journal of Chemical Thermodynamics*, 2017, **106**, 16–21.



- 37 T. Maekawa, [Equilibrium conditions for gas hydrates of methane and ethane mixtures in pure water and sodium chloride solution](#), *Geochemical Journal*, 2001, **35**, 59–66.
- 38 T. Maekawa, [Equilibrium conditions for clathrate hydrates formed from methane and aqueous propanol solutions](#), *Fluid Phase Equilibria*, 2008, **267**, 1–5.
- 39 D. R. Marshall, S. Saito and R. Kobayashi, [Hydrates at high pressures: Part i. Methane-water, argon-water, and nitrogen-water systems](#), *AIChE Journal*, 1964, **10**, 202–205.
- 40 H. O. McLeod and J. M. Campbell, [Natural gas hydrates at pressures to 10,000 psia](#), *Journal of Petroleum Technology*, 1961, **13**, 590–594.
- 41 A. H. Mohammadi, B. Tohidi and R. W. Burgass, [Equilibrium data and thermodynamic modeling of nitrogen, oxygen, and air clathrate hydrates](#), *Journal of Chemical & Engineering Data*, 2003, **48**, 612–616.
- 42 A. H. Mohammadi, R. Anderson and B. Tohidi, Carbon monoxide clathrate hydrates: Equilibrium data and thermodynamic modeling, *AIChE journal*, 2005, **51**, 2825–2833.
- 43 L. Mu and N. von Solms, [Hydrate thermal dissociation behavior and dissociation enthalpies in methane-carbon dioxide swapping process](#), *Journal of Chemical Thermodynamics*, 2018, **117**, 33–42.
- 44 T. Nakamura, T. Makino, T. Sugahara and K. Ohgaki, Stability boundaries of gas hydrates helped by methane—structure-h hydrates of methylcyclohexane and cis-1, 2-dimethylcyclohexane, *Chemical engineering science*, 2003, **58**, 269–273.
- 45 S. Nakano, M. Moritoki and K. Ohgaki, [High-pressure phase equilibrium and raman microprobe spectroscopic studies on the methane hydrate system](#), *Journal of Chemical and Engineering Data*, 1999, **44**, 254–257.

- 46 J. Nixdorf and L. R. Oellrich, [Experimental determination of hydrate equilibrium conditions for pure gases, binary and ternary mixtures and natural gases](#), *Fluid Phase Equilibria*, 1997, **139**, 325–333.
- 47 K. Ohgaki, K. Takano, H. Sangawa, T. Matsubara and S. Nakano, [Methane exploitation by carbon dioxide from gas hydrates. Phase equilibria for CO<sub>2</sub>-CH<sub>4</sub> mixed hydrate system.](#), *JOURNAL OF CHEMICAL ENGINEERING OF JAPAN*, 1996, **29**, 478–483.
- 48 R. Ohmura, S. Kashiwazaki, S. Shiota, H. Tsuji and Y. H. Mori, [Structure-i and structure-h hydrate formation using water spraying](#), *Energy & Fuels*, 2002, **16**, 1141–1147.
- 49 H. Pahlavanzadeh, H. Hassan and M. Pourranjbar, [Hydrate dissociation conditions of CH<sub>4</sub> in the presence of TBANO<sub>3</sub> and cyclopentane promoter mixture: Thermodynamic modeling and experimental measurement](#), *Journal of Chemical and Engineering Data*, 2020, **65**, 1927–1935.
- 50 O. L. Roberts, E. R. Brownscombe, L. S. Howe and H. Ramser, Constitution diagrams and composition of methane and ethane hydrates, *Oil Gas J*, 1940, **39**, 37–43.
- 51 A. Saberi, A. Alamdari, A. Shariati and A. H. Mohammadi, [Experimental measurement and thermodynamic modeling of equilibrium condition for natural gas hydrate in MEG aqueous solution](#), *Fluid Phase Equilibria*, 2018, **459**, 110–118.
- 52 K. M. Sabil, Q. Nasir, B. Partoon and A. A. Seman, [Measurement of h-LW-v and dissociation enthalpy of carbon dioxide rich synthetic natural gas mixtures](#), *Journal of Chemical & Engineering Data*, 2014, **59**, 3502–3509.
- 53 D. Sadeq, S. Iglauer, M. Lebedev, C. Smith and A. Barifcani, [Experimental determination of hydrate phase equilibrium for different gas mixtures containing methane, carbon dioxide and nitrogen with motor current measurements](#), *Journal of Natural Gas Science and Engineering*, 2017, **38**, 59–73.
- 54 N. A. Sami, K. Das, J. S. Sangwai and N. Balasubramanian, [Phase equilibria of methane and carbon dioxide clathrate hydrates in the presence of \(methanol+MgCl<sub>2</sub>\) and \(ethylene glycol+MgCl<sub>2</sub>\) aqueous solutions](#), *The Journal of Chemical Thermodynamics*, 2013, **65**, 198–203.

- 55 P. Servio and P. Englezos, [Measurement of dissolved methane in water in equilibrium with its hydrate](#), *Journal of Chemical & Engineering Data*, 2002, **47**, 87–90.
- 56 E. A. Smelik and H. E. King, [Crystal-growth studies of natural gas clathrate hydrates using a pressurized optical cell](#), *American Mineralogist*, 1997, **82**, 88–98.
- 57 S. Sun, J. Zhao and D. Yu, [Dissociation enthalpy of methane hydrate in salt solution](#), *Fluid Phase Equilibria*, 2018, **456**, 92–97.
- 58 T. M. Svartas and E. H. Fadnes, in *Proceedings of the second (1992) international offshore and polar engineering conference*, 1992, vol. I, pp. 614–619.
- 59 J. L. Thakore and G. D. Holder, [Solid—vapor azeotropes in hydrate-forming systems](#), *Industrial and Engineering Chemistry Research*, 1987, **26**, 462–469.
- 60 D. L. Verma, Y. K., Hand, J. H., Katz, in *GVC/AIChE join meeting at munich, 1975*, 1974.
- 61 Z. T. Ward, C. E. Deering, R. A. Marriott, A. K. Sum, E. D. Sloan and C. A. Koh, [Phase equilibrium data and model comparisons for H<sub>2</sub>S hydrates](#), *Journal of Chemical & Engineering Data*, 2015, **60**, 403–408.
- 62 K. Xiao, C. Zou, Y. Yang, H. Zhang, H. Li and Z. Qin, [A preliminary study of the gas hydrate stability zone in a gas hydrate potential region of china](#), *Energy Science and Engineering*, 2019, **8**, 1080–1091.
- 63 S. Xu, S. Fan, H. Yao, Y. Wang, X. Lang, P. Lv and S. Fang, [The phase equilibria of multicomponent gas hydrate in methanol/ethylene glycol solution based formation water](#), *The Journal of Chemical Thermodynamics*, 2017, **104**, 212–217.
- 64 S. O. Yang, S. H. Cho, H. Lee and C. S. Lee, [Measurement and prediction of phase equilibria for water + methane in hydrate forming conditions](#), *Fluid Phase Equilibria*, 2001, **185**, 53–63.

- 65 K. Yasuda and R. Ohmura, [Phase equilibrium for clathrate hydrates formed with methane, ethane, propane, or carbon dioxide at temperatures below the freezing point of water](#), *Journal of Chemical & Engineering Data*, 2008, **53**, 2182–2188.
- 66 T. Y. Makogon and E. D. Sloan, [Phase equilibrium for methane hydrate from 190 to 262 k](#), *Journal of Chemical and Engineering Data*, 1994, **39**, 351–353.
- 67 H. D. Nagashima, N. Fukushima and R. Ohmura, [Phase equilibrium condition measurements in carbon dioxide clathrate hydrate forming system from 199.1 k to 247.1 k](#), *Fluid Phase Equilibria*, 2016, **413**, 53–56.
- 68 D. A. Avlonitis, Master of Science Thesis, Heriot-Watt University, 1988.
- 69 P. Englezos and P. R. Bishnoi, [Experimental study on the equilibrium ethane hydrate formation conditions in aqueous electrolyte solutions](#), *Industrial and Engineering Chemistry Research*, 1991, **30**, 1655–1659.
- 70 B. J. Falabella and M. Vanpee, Experimental determination of gas hydrate equilibrium below the ice point, 1974, **13**, 1–4.
- 71 S. Hashimoto, A. Sasatani, Y. Matsui, T. Sugahara and K. Ohgaki, [Isothermal phase equilibria for methane + ethane + water ternary system containing gas hydrates](#), *The Open Thermodynamics Journal*, 2008, **2**, 100–105.
- 72 G. D. Holder and G. C. Grigoriou, [Hydrate dissociation pressures of \(methane + ethane + water\) existence of a locus of minimum pressures](#), *Journal of Chemical Thermodynamics*, 1980, **12**, 1093–1104.
- 73 G. D. Holder and S. P. Godbole, [Measurement and prediction of dissociation pressures of isobutane and propane hydrates below the ice point](#), *AIChE Journal*, 1982, **28**, 930–934.
- 74 Z. Long, J.-W. Du, D. Li and D. Liang, [Phase equilibria of ethane hydrate in MgCl<sub>2</sub> aqueous solutions](#), *Journal of Chemical & Engineering Data*, 2010, **55**, 2938–2941.

- 75 T. Maekawa, [Equilibrium conditions of ethane hydrates in the presence of aqueous solutions of alcohols, glycols, and glycerol](#), *Journal of Chemical & Engineering Data*, 2012, **57**, 526–531.
- 76 Y. Matsui, Y. Ogura, H. Miyauchi, T. Makino, T. Sugahara and K. Ohgaki, [Isothermal phase equilibria for binary hydrate systems of carbon dioxide + ethane and carbon dioxide + tetrafluoromethane](#), *Journal of Chemical and Engineering Data*, 2010, **55**, 3297–3301.
- 77 A. H. Mohammadi and D. Richon, [Ice-clathrate hydrate-gas phase equilibria for air, oxygen, nitrogen, carbon monoxide, methane, or ethane + water system](#), *Industrial & Engineering Chemistry Research*, 2010, **49**, 3976–3979.
- 78 A. H. Mohammadi, W. Afzal and D. Richon, [Experimental data and predictions of dissociation conditions for ethane and propane simple hydrates in the presence of distilled water and methane, ethane, propane, and carbon dioxide simple hydrates in the presence of ethanol aqueous solutions](#), *Journal of Chemical & Engineering Data*, 2008, **53**, 73–76.
- 79 K. Morita, S. Nakano and K. Ohgaki, [Structure and stability of ethane hydrate crystal](#), *Fluid Phase Equilibria*, 2000, **169**, 167–175.
- 80 S. Nakano, K. Yamamoto and K. Ohgaki, [Natural gas exploitation by carbon dioxide from gas hydrate fields - high-pressure phase equilibrium for an ethane hydrate system](#), *Proceedings of the Institution of Mechanical Engineers, Part A: Journal of Power and Energy*, 1998, **212**, 159–163.
- 81 H.-J. Ng, C.-J. Chen and D. B. Robinson, *The effect of ethylene glycol or methanol on hydrate formation in systems containing ethane, propane, carbon dioxide, hydrogen sulfide, or a typical gas condensate*, Gas Processors Association, 1985.
- 82 H. J. Ng and D. B. Robinson, Equilibrium phase composition and hydrating conditions in systems containing methanol, light hydrocarbons, carbon dioxide, and hydrogen sulfide, *Gas Processors Association - Research Report*.
- 83 H. H. Reamer, F. T. Selleck and B. H. Sage, [Some properties of mixed paraffinic and olefinic hydrates](#), *Journal of Petroleum Technology*, 1952, **4**, 197–202.

- 84 J. M. Chima-Maceda, P. Esquivel-Mora, A. Pimentel-Rodas, L. A. Galicia-Luna and J. J. Castro-Arellano, [Effect of 1-propanol and TBAB on gas hydrates dissociation conditions for CO<sub>2</sub> + hexane + water systems](#), *Journal of Chemical & Engineering Data*, 2019, **64**, 4775–4780.
- 85 M. L. Dai, Z. G. Sun, J. Li, C. M. Li and H. F. Huang, [Effect of n-dodecane on equilibrium dissociation conditions of carbon dioxide hydrate](#), *Journal of Chemical Thermodynamics*, 2020, **148**, 106144.
- 86 P. D. Dholabhai, N. Kalogerakis and P. R. Bishnoi, [Equilibrium conditions for carbon dioxide hydrate formation in aqueous electrolyte solutions](#), *Journal of Chemical and Engineering Data*, 1993, **38**, 650–654.
- 87 S.-S. Fan and T.-M. Guo, [Hydrate formation of CO<sub>2</sub>-rich binary and quaternary gas mixtures in aqueous sodium chloride solutions](#), *Journal of Chemical & Engineering Data*, 1999, **44**, 829–832.
- 88 S. S. Fan, G. J. Chen, Q. L. Ma and T. M. Guo, [Experimental and modeling studies on the hydrate formation of CO<sub>2</sub> and CO<sub>2</sub>-rich gas mixtures](#), *Chemical Engineering Journal*, 2000, **78**, 173–178.
- 89 P. F. Ferrari, A. Z. Guembaroski, M. A. M. Neto, R. E. M. M. Morales, A. K. Sum, M. A. Marcelino Neto, R. E. M. M. Morales and A. K. Sum, [Experimental measurements and modelling of carbon dioxide hydrate phase equilibrium with and without ethanol](#), *Fluid Phase Equilibria*, 2016, **413**, 176–183.
- 90 P. Ilani-Kashkouli, A. H. Mohammadi, P. Naidoo and D. Ramjugernath, [Thermodynamic stability conditions for semi-clathrate hydrates of CO<sub>2</sub>, CH<sub>4</sub>, or N<sub>2</sub> with tetrabutyl ammonium nitrate \(TBANO<sub>3</sub>\) aqueous solution](#), *The Journal of Chemical Thermodynamics*, 2016, **96**, 52–56.
- 91 A. Jarrahan and A. Nakhaee, [Hydrate–liquid–vapor equilibrium condition of N<sub>2</sub>+ CO<sub>2</sub> + H<sub>2</sub>O system: Measurement and modeling](#), *Fuel*, 2019, **237**, 769–774.

- 92 M. S. Khan, B. Partoon, C. B. Bavoh, B. Lal and N. B. Mellon, [Influence of tetramethylammonium hydroxide on methane and carbon dioxide gas hydrate phase equilibrium conditions](#), *Fluid Phase Equilibria*, 2017, **440**, 1–8.
- 93 S. D. Larson, *PHASE STUDIES OF THE TWO-COMPONENT CARBON-DIOXIDE-WATER SYSTEM INVOLVING THE CARBON-DIOXIDE HYDRATE*, University of Illinois at Urbana-Champaign, 1955.
- 94 Y. Lee, T. Kawamura, Y. Yamamoto and J. Yoon, [Phase equilibrium studies of tetrahydrofuran \(THF\) + CH<sub>4</sub>, THF + CO<sub>2</sub>, CH<sub>4</sub> + CO<sub>2</sub>, and THF + CO<sub>2</sub> + CH<sub>4</sub> hydrates](#), *Journal of Chemical & Engineering Data*, 2012, **57**, 3543–3548.
- 95 T. Maekawa, [Equilibrium conditions for carbon dioxide hydrates in the presence of aqueous solutions of alcohols, glycols, and glycerol](#), *Journal of Chemical & Engineering Data*, 2010, **55**, 1280–1284.
- 96 N. Mannar, C. B. Bavoh, A. H. Baharudin, B. Lal and N. B. Mellon, [Thermophysical properties of aqueous lysine and its inhibition influence on methane and carbon dioxide hydrate phase boundary condition](#), *Fluid Phase Equilibria*, 2017, **454**, 57–63.
- 97 V. P. Melnikov, A. N. Nesterov, A. M. Reshetnikov and V. A. Istomin, [Metastable states during dissociation of carbon dioxide hydrates below 273K](#), *Chemical Engineering Science*, 2011, **66**, 73–77.
- 98 A. H. Mohammadi, Phase stability conditions of carbon dioxide clathrate hydrate in the presence of ethanol and ethanol + salt aqueous solutions, *Petroleum and Coal*, 2018, **60**, 349–352.
- 99 A. H. Mohammadi and D. Richon, [Ice-clathrate hydrate-gas phase equilibria for argon + water and carbon dioxide + water systems](#), *Industrial and Engineering Chemistry Research*, 2011, **50**, 11452–11454.
- 100 Y. Nema, R. Ohmura, I. Senaha and K. Yasuda, [Quadruple point determination in carbon dioxide hydrate forming system](#), *Fluid Phase Equilibria*, 2017, **441**, 49–53.

- 101 K. Ohgaki, Y. Makihara and K. Takano, [Formation of CO<sub>2</sub> hydrate in pure and sea waters.](#), *JOURNAL OF CHEMICAL ENGINEERING OF JAPAN*, 1993, **26**, 558–564.
- 102 D. B. Robinson and B. R. Metha, Hydrates in the PropaneCarbon dioxide- water system, *Journal of Canadian Petroleum Technology*, DOI:[10.2118/71-01-04](#).
- 103 L. Ruffine and J. P. M. Trusler, [Phase behaviour of mixed-gas hydrate systems containing carbon dioxide](#), *Journal of Chemical Thermodynamics*, 2010, **42**, 605–611.
- 104 K. M. Sabil, G. J. Witkamp and C. J. Peters, [Estimations of enthalpies of dissociation of simple and mixed carbon dioxide hydrates from phase equilibrium data](#), *Fluid Phase Equilibria*, 2010, **290**, 109–114.
- 105 M. Seif, A. Kamran-Pirzaman and A. H. Mohammadi, [Phase equilibria of clathrate hydrates in CO<sub>2</sub>/CH<sub>4</sub> + \(1-propanol/2-propanol\) + water systems: Experimental measurements and thermodynamic modeling](#), *The Journal of Chemical Thermodynamics*, 2018, **118**, 58–66.
- 106 Y.-T. Seo, S.-P. Kang, H. Lee, C.-S. Lee and W.-M. Sung, [Hydrate phase equilibria for gas mixtures containing carbon dioxide: A proof-of-concept to carbon dioxide recovery from multicomponent gas stream](#), *Korean Journal of Chemical Engineering*, 2000, **17**, 659–667.
- 107 P. Servio and P. Englezos, [Effect of temperature and pressure on the solubility of carbon dioxide in water in the presence of gas hydrate](#), *Fluid Phase Equilibria*, 2001, **190**, 127–134.
- 108 D. Sun, J. Ripmeester and P. Englezos, [Phase equilibria for the CO<sub>2</sub>/CH<sub>4</sub>/N<sub>2</sub>/H<sub>2</sub>O system in the hydrate region under conditions relevant to storage of CO<sub>2</sub> in depleted natural gas reservoirs](#), *Journal of Chemical and Engineering Data*, 2016, **61**, 4061–4067.
- 109 S. Takenouchi and G. C. Kennedy, Dissociation pressures of the phase CO<sub>2</sub> 3/4 H<sub>2</sub>O, *The Journal of geology*, 1965, **73**, 383–390.
- 110 C. H. Unruh and D. L. Katz, [Gas hydrates of carbon dioxide-methane mixtures](#), *Journal of Petroleum Technology*, 1949, **1**, 83–86.



- 111 J. G. Vlahakis, The growth rate of ice crystals: The properties of carbon dioxide hydrate a review of properties of 51 gas hydrates, *OSW*, 1972, **830**, 36.
- 112 M. Wendland, H. Hasse and G. Maurer, [Experimental pressure-temperature data on three- and four-phase equilibria of fluid, hydrate, and ice phases in the system carbon dioxide-water](#), *Journal of Chemical and Engineering Data*, 1999, **44**, 901–906.
- 113 J.-H. Yoon and H. Lee, [Clathrate phase equilibria for the water–phenol–carbon dioxide system](#), *AIChE Journal*, 1997, **43**, 1884–1893.
- 114 Y. S. Yu, S. D. Zhou, X. S. Li and S. L. Wang, [Effect of graphite nanoparticles on CO<sub>2</sub> hydrate phase equilibrium](#), *Fluid Phase Equilibria*, 2016, **414**, 23–28.
- 115 L. Zha, D. Q. Liang and D. L. Li, [Phase equilibria of CO<sub>2</sub> hydrate in NaCl-MgCl<sub>2</sub> aqueous solutions](#), *Journal of Chemical Thermodynamics*, 2012, **55**, 110–114.
- 116 H. KUBOTA, K. SHIMIZU, Y. TANAKA and T. MAKITA, [Thermodynamic properties of R13 \(CClF<sub>3</sub>\), R23 \(CHF<sub>3</sub>\), R152a \(C<sub>2</sub>H<sub>4</sub>F<sub>2</sub>\), and propane hydrates for desalination of sea water.](#), *JOURNAL OF CHEMICAL ENGINEERING OF JAPAN*, 1984, **17**, 423–429.
- 117 T. Maekawa, [Equilibrium conditions of propane hydrates in aqueous solutions of alcohols, glycols, and glycerol](#), *Journal of Chemical and Engineering Data*, 2008, **53**, 2838–2843.
- 118 M. M. M. V. Den Heuvel, C. J. Peters and J. De Swaan Arons, [Gas hydrate phase equilibria for propane in the presence of additive components](#), *Fluid Phase Equilibria*, 2002, **193**, 245–259.
- 119 S. L. Patil, M.Sc. thesis, University of Alaska, Anchorage, Alaska, USA, 1987.
- 120 Y. Lee, S. Lee, J. Lee and Y. Seo, [Structure identification and dissociation enthalpy measurements of the CO<sub>2</sub>+N<sub>2</sub> hydrates for their application to CO<sub>2</sub> capture and storage](#), *Chemical Engineering Journal*, 2014, **246**, 20–26.

- 121 K. Sugahara, Y. Tanaka, T. Sugahara and K. Ohgaki, [Thermodynamic stability and structure of nitrogen hydrate crystal](#), *Journal of Supramolecular Chemistry*, 2002, **2**, 365–368.
- 122 A. van Cleeff and G. A. M. Diepen, [Gas hydrates of nitrogen and oxygen](#), *Recueil des Travaux Chimiques des Pays-Bas*, 2010, **79**, 582–586.
- 123 K. Yasuda, Y. Oto, R. Shen, T. Uchida and R. Ohmura, [Phase equilibrium condition measurements in nitrogen and air clathrate hydrate forming systems at temperatures below freezing point of water](#), *Journal of Chemical Thermodynamics*, 2013, **67**, 143–147.
- 124 K. I. Adeniyi, C. E. Deering, G. P. Nagabhushana and R. A. Marriott, [Hydrogen sulfide hydrate dissociation in the presence of liquid water](#), *Industrial and Engineering Chemistry Research*, 2018, **57**, 15579–15585.
- 125 D. C. Bond and N. B. Russell, [Effect of antifreeze agents on the formation of hydrogen sulphide hydrate](#), *Transactions of the AIME*, 1949, **179**, 192–198.
- 126 J. J. Carroll and A. E. Mather, [Phase equilibrium in the system water-hydrogen sulphide: Hydrate-forming conditions](#), *The Canadian Journal of Chemical Engineering*, 1991, **69**, 1206–1212.
- 127 K. N. Mahadev and P. R. Bishnoi, [Equilibrium conditions for the hydrogen sulfide hydrate formation in the presence of electrolytes and methanol](#), *Canadian Journal of Chemical Engineering*, 1999, **77**, 718–722.
- 128 A. H. Mohammadi and D. Richon, [Equilibrium data of methyl cyclohexane + hydrogen sulfide and methyl cyclohexane + methane clathrate hydrates](#), *Journal of Chemical & Engineering Data*, 2009, **55**, 566–569.
- 129 F. T. Selleck, L. T. Carmichael and B. H. Sage, [Phase behavior in the hydrogen sulfide-water system](#), *Industrial & Engineering Chemistry*, 1952, **44**, 2219–2226.

- 130 A. H. Mohammadi and D. Richon, [Methane hydrate phase equilibrium in the presence of salt \(NaCl, KCl, or CaCl<sub>2</sub>\) + ethylene glycol or salt \(NaCl, KCl, or CaCl<sub>2</sub>\) + methanol aqueous solution: Experimental determination of dissociation condition](#), *Journal of Chemical Thermodynamics*, 2009, **41**, 1374–1377.
- 131 O. S. Rouher and A. J. Barduhn, [Hydrates of iso- and normal butane and their mixtures](#), *Desalination*, 1969, **6**, 57–73.
- 132 G. R. Schneider and J. Farrar, *Nucleation and growth of ice crystals*, US Department of the Interior USA, 1968.
- 133 B.-J. Wu, D. B. Robinson and H.-J. Ng, [Three- and four-phase hydrate forming conditions in methane + isobutane + water](#), *The Journal of Chemical Thermodynamics*, 1976, **8**, 461–469.
- 134 P. V. Hemmingsen, R. Burgass, K. S. Pedersen, K. Kinnari and H. Sørensen, [Hydrate temperature depression of MEG solutions at concentrations up to 60wt%. Experimental data and simulation results](#), *Fluid Phase Equilibria*, 2011, **307**, 175–179.
- 135 S. Ovalle and J. G. Beltran, [Growth mechanisms and phase equilibria of propane and methane + propane hydrates](#), *Journal of Chemical & Engineering Data*, 2021, acs.jced.1c00329.
- 136 S. G. Paranjpe, S. L. Patil, V. A. Kamath and S. P. Godbole, in *SPE annual technical conference and exhibition*, 1987, pp. 379–390.
- 137 C. Smith, D. Pack and A. Barifcani, [Propane, n-butane and i-butane stabilization effects on methane gas hydrates](#), *The Journal of Chemical Thermodynamics*, 2017, **115**, 293–301.
- 138 H. Bruusgaard, A. Carbone and P. Servio, [H–l w –v equilibrium measurements for the CH<sub>4</sub> + c<sub>2</sub>h<sub>6</sub> + h<sub>2</sub>o hydrate forming system](#), *Journal of Chemical & Engineering Data*, 2010, **55**, 3680–3683.
- 139 Y. Hu, T. Y. Makogon, P. Karanjkar, K. H. Lee, B. R. Lee and A. K. Sum, [Gas hydrates phase equilibria for structure I and II hydrates with chloride salts at high salt concentrations and up to 200 MPa](#), *Journal of Chemical Thermodynamics*, 2018, **117**, 27–32.

- 140 S. Subramanian, R. A. Kini, S. F. Dec and E. D. Sloan, [Evidence of structure II hydrate formation from methane+ethane mixtures](#), *Chemical Engineering Science*, 2000, **55**, 1981–1999.
- 141 H. Bruusgaard, J. G. Beltrán and P. Servio, [Vapor-liquid water-hydrate equilibrium data for the system N<sub>2</sub> + CO<sub>2</sub> + H<sub>2</sub>O](#), *Journal of Chemical and Engineering Data*, 2008, **53**, 2594–2597.
- 142 G. DOYNE, PhD thesis, University of Michigan, 1976.
- 143 M. M. den Heuvel, Phase behaviour and structural aspects of ternary clathrate hydrate systems: The role of additives, *Technische Universiteit Delft, Netherlands*.
- 144 V. Belandria, A. H. Mohammadi and D. Richon, [Phase equilibria of clathrate hydrates of methane+carbon dioxide: New experimental data and predictions](#), *Fluid Phase Equilibria*, 2010, **296**, 60–65.
- 145 V. Belandria, A. Eslamimanesh, A. H. Mohammadi, P. Théveneau, H. Legendre and D. Richon, [Compositional analysis and hydrate dissociation conditions measurements for carbon dioxide + methane + water system](#), *Industrial and Engineering Chemistry Research*, 2011, **50**, 5783–5794.
- 146 V. R. Belosludov, Y. Y. Bozhko, O. S. Subbotin, R. V. Belosludov, R. K. Zhdanov, K. V. Gets and Y. Kawazoe, [Influence of N<sub>2</sub> on formation conditions and guest distribution of mixed CO<sub>2</sub> + CH<sub>4</sub> gas hydrates](#), *Molecules*, 2018, **23**, 1–15.
- 147 J. G. Beltrán and P. Servio, [Equilibrium studies for the system methane+ carbon dioxide+ neohexane+ water](#), *Journal of Chemical & Engineering Data*, 2008, **53**, 1745–1749.
- 148 A. Chapoy, R. Burgass, B. Tohidi and I. Alsiyabi, [Hydrate and phase behavior modeling in CO<sub>2</sub>-rich pipelines](#), *Journal of Chemical and Engineering Data*, 2015, **60**, 447–463.

- 149 S. Fan, S. You, Y. Wang, X. Lang, C. Yu, S. Wang, Z. Li, W. Li, Y. Liu and Z. Zhou, [Hydrate phase equilibrium of CH<sub>4</sub>-rich binary and ternary gas mixtures in the presence of tetra-n-butyl ammonium bromide](#), *Journal of Chemical and Engineering Data*, 2019, **64**, 5929–5934.
- 150 J. M. Herri, A. Bouchemoua, M. Kwaterski, A. Fezoua, Y. Ouabbas and A. Cameirao, [Gas hydrate equilibria for CO<sub>2</sub>-N<sub>2</sub> and CO<sub>2</sub>-CH<sub>4</sub> gas mixtures-experimental studies and thermodynamic modelling](#), *Fluid Phase Equilibria*, 2011, **301**, 171–190.
- 151 P. Kastanidis, G. E. Romanos, A. K. Stubos, I. G. Economou and I. N. Tsimpanogiannis, [Two- and three-phase equilibrium experimental measurements for the ternary CH<sub>4</sub> + CO<sub>2</sub> + H<sub>2</sub>O mixture](#), *Fluid Phase Equilibria*, 2017, **451**, 96–105.
- 152 M. S. Khan, B. Lal, A. M. Shariff and H. Mukhtar, [Ammonium hydroxide ILs as dual-functional gas hydrate inhibitors for binary mixed gas \(carbon dioxide and methane\) hydrates](#), *Journal of Molecular Liquids*, 2019, **274**, 33–44.
- 153 D. Le Quang, D. Le Quang, B. Bouillot, J.-M. Herri, P. Glenat and P. Duchet-Suchaux, [Experimental procedure and results to measure the composition of gas hydrate, during crystallization and at equilibrium, from n 2 –CO 2 –CH 4 –c 2 h 6 –c 3 h 8 –c 4 h 10 gas mixtures](#), *Fluid Phase Equilibria*, 2016, **413**, 10–21.
- 154 L. N. Legoix, L. Ruffine, C. Deusner and M. Haeckel, Experimental study of mixed gas hydrates from gas feed containing CH<sub>4</sub>, CO<sub>2</sub> and N<sub>2</sub>: Phase equilibrium in the presence of excess water and gas exchange, *Energies*, DOI:[10.3390/en11081984](#).
- 155 E. O. Obanijesu, A. Barifcani, V. K. Pareek and M. O. Tade, [Experimental study on feasibility of H<sub>2</sub> and N<sub>2</sub> as hydrate inhibitors in natural gas pipelines](#), *Journal of Chemical and Engineering Data*, 2014, **59**, 3756–3766.
- 156 B. Partoon, K. M. Sabil, H. Roslan, B. Lal and L. K. Keong, [Impact of acetone on phase boundary of methane and carbon dioxide mixed hydrates](#), *Fluid Phase Equilibria*, 2016, **412**, 51–56.
- 157 P. Servio, F. Lagers, C. Peters and P. Englezos, [Gas hydrate phase equilibrium in the system methane-carbon dioxide-neohexane and water](#), *Fluid Phase Equilibria*, 1999, **158-160**, 795–800.

- 158 L.-L. Shi, D.-Q. Liang and D.-L. Li, [Phase equilibrium conditions for simulated landfill gas hydrate formation in aqueous solutions of tetrabutylammonium nitrate](#), *The Journal of Chemical Thermodynamics*, 2014, **68**, 322–326.
- 159 X. Zang and D. Liang, [Phase equilibrium data for semiclathrate hydrate of synthesized binary CO<sub>2</sub>/CH<sub>4</sub> gas mixture in tetra-n-butylammonium bromide aqueous solution](#), *Journal of Chemical and Engineering Data*, 2017, **62**, 851–856.
- 160 Y. D. Zhang, D. Wang, J. P. Yang, L. Tian and L. Wu, [Research on the hydrate formation in the process of gas phase CO<sub>2</sub> pipeline transportation](#), *International Journal of Heat and Technology*, 2016, **34**, 339–344.
- 161 S. Adisasmito and E. D. Sloan, [Hydrates of hydrocarbon gases containing carbon dioxide](#), *Journal of Chemical & Engineering Data*, 1992, **37**, 343–349.
- 162 H.-J. Ng and D. B. Robinson, [The measurement and prediction of hydrate formation in liquid hydrocarbon-water systems](#), *Industrial & Engineering Chemistry Fundamentals*, 1976, **15**, 293–298.
- 163 J.-W. Lee, D.-Y. Kim and H. Lee, [Phase behavior and structure transition of the mixed methane and nitrogen hydrates](#), *Korean Journal of Chemical Engineering*, 2006, **23**, 299–302.
- 164 D. H. Mei, J. Liao, J. T. Yang and T. M. Guo, [Experimental and modeling studies on the hydrate formation of a methane + nitrogen gas mixture in the presence of aqueous electrolyte solutions](#), *Industrial and Engineering Chemistry Research*, 1996, **35**, 4342–4347.
- 165 H.-J. Ng, J. P. Petrunia and D. B. Robinson, [Experimental measurement and prediction of hydrate forming conditions in the nitrogen-propane-water system](#), *Fluid Phase Equilibria*, 1977, **1**, 283–291.
- 166 V. Belandria, A. Eslamimanesh, A. H. Mohammadi and D. Richon, [Gas hydrate formation in carbon dioxide + nitrogen + water system: Compositional analysis of equilibrium phases](#), *Industrial & Engineering Chemistry Research*, 2011, **50**, 4722–4730.

- 167 V. Belandria, A. H. Mohammadi, A. Eslamimanesh, D. Richon, M. F. Sánchez-Mora and L. A. Galicia-Luna, [Phase equilibrium measurements for semi-clathrate hydrates of the \(CO<sub>2</sub>+n C<sub>2</sub>+tetra-n-butylammonium bromide\) aqueous solution systems: Part 2](#), *Fluid Phase Equilibria*, 2012, **322-323**, 105–112.
- 168 S. P. Kang, H. Lee, C. S. Lee and W. M. Sung, [Hydrate phase equilibria of the guest mixtures containing CO<sub>2</sub>, N<sub>2</sub> and tetrahydrofuran](#), *Fluid Phase Equilibria*, 2001, **185**, 101–109.
- 169 S. H. Kim, M. D. Seo, J. W. Kang and C. S. Lee, [Hydrate-containing phase equilibria for mixed guests of carbon dioxide and nitrogen](#), *Fluid Phase Equilibria*, 2011, **306**, 229–233.
- 170 B. Olsen, A. Majumdar and R. Bishnoi, Experimental studies dioxide on hydrate and its systems, *Int. J. of Mat. Eng. for Resources*, 1999, **7**, 17–23.
- 171 W. G. Rho, S. H. Kim, D. W. Cho, J. W. Kang and C. S. Lee, [An experimental and modeling study on incipient hydrate-forming conditions for ternary guests of carbon dioxide, nitrogen and sulfur dioxide](#), *Fluid Phase Equilibria*, 2018, **473**, 127–131.
- 172 S.-C. Sun, C.-L. Liu and Q.-G. Meng, [Hydrate phase equilibrium of binary guest-mixtures containing CO<sub>2</sub> and N<sub>2</sub> in various systems](#), *The Journal of Chemical Thermodynamics*, 2015, **84**, 1–6.
- 173 L. J. Noaker and D. L. Katz, [Gas hydrates of hydrogen sulfide-methane mixtures](#), *Journal of Petroleum Technology*, 1954, **6**, 135–137.
- 174 A. H. Mohammadi and D. Richon, [Hydrate phase equilibria of gaseous mixtures of methane + carbon dioxide + hydrogen sulfide](#), *Chemical Engineering Communications*, 2015, **202**, 629–633.
- 175 Z. T. Ward, R. A. Marriott, A. K. Sum, E. D. Sloan and C. A. Koh, [Equilibrium data of gas hydrates containing methane, propane, and hydrogen sulfide](#), *Journal of Chemical & Engineering Data*, 2015, **60**, 424–428.

- 176 H.-J. Ng and D. B. Robinson, [The role of n-butane in hydrate formation](#), *AIChE Journal*, 1976, **22**, 656–661.
- 177 V. T. John and G. D. Holder, [Hydrates of methane + n-butane below the ice point](#), *Journal of Chemical and Engineering Data*, 1982, **27**, 18–21.
- 178 V. A. Kamath and G. D. Holder, in *Annual AIChE meeting*, Los Angeles, 1982.
- 179 M. A. Behnamotlagh, R. Hashemi, Z. Taheri Rizi, M. Mohammadtaheri and M. Mohammadi, [Experimental study of the effect of the combined monoethylene glycol with NaCl/CaCl<sub>2</sub> salts on sour gas hydrate inhibition with low-concentration hydrogen sulfide](#), *Journal of Chemical & Engineering Data*, 2022, **67**, 1250–1258.
- 180 P. B. Dharmawardhana, W. R. Parrish and E. D. Sloan, [Experimental thermodynamic parameters for the prediction of natural gas hydrate dissociation conditions](#), *Industrial and Engineering Chemistry Fundamentals*, 1980, **19**, 410–414.
- 181 S. Ovalle, C. Martinez and J. G. Beltran, [Phase equilibria of hydrates from ternary mixtures of methane + ethane + propane and methane + propane + carbon dioxide](#), *The Canadian Journal of Chemical Engineering*, 2022, 1–6.
- 182 D. B. Robinson and J. B. Hutton, [Hydrate formation in systems containing methane, hydrogen sulphide and carbon dioxide](#), *Journal of Canadian Petroleum Technology*, 1967, **6**, 6–9.
- 183 J. P. Schroeter, R. Kobayashi and M. A. Hildebrand, [Hydrate decomposition conditions in the system hydrogen sulfide-methane-propane](#), *Industrial & Engineering Chemistry Fundamentals*, 1983, **22**, 361–364.
- 184 C. Y. Sun, G. J. Chen, W. Lin and T. M. Guo, [Hydrate formation conditions of sour natural gases](#), *Journal of Chemical and Engineering Data*, 2003, **48**, 600–602.



- 185 Y. H. Sun, S. L. Li, G. B. Zhang, W. Guo and Y. H. Zhu, [Hydrate phase equilibrium of CH<sub>4</sub>+N<sub>2</sub>+CO<sub>2</sub> gas mixtures and cage occupancy behaviors](#), *Industrial and Engineering Chemistry Research*, 2017, **56**, 8133–8142.
- 186 Z. G. Sun, S. S. Fan, L. Shi, Y. K. Guo and K. H. Guo, [Equilibrium conditions hydrate dissociation for a ternary mixture of methane, ethane, and propane in aqueous solutions of ethylene glycol and electrolytes](#), *Journal of Chemical and Engineering Data*, 2001, **46**, 927–929.
- 187 X. Zang and D. Liang, [Phase equilibrium data for the hydrates of synthesized ternary CH<sub>4</sub>/CO<sub>2</sub>/N<sub>2</sub> biogas mixtures](#), *Journal of Chemical and Engineering Data*, 2018, **63**, 197–201.
- 188 M. Cha, K. Shin, J. Kim, D. Chang, Y. Seo, H. Lee and S.-P. Kang, [Thermodynamic and kinetic hydrate inhibition performance of aqueous ethylene glycol solutions for natural gas](#), *Chemical Engineering Science*, 2013, **99**, 184–190.
- 189 R. Kobayashi, H. J. Withrow, G. B. Williams and D. L. Katz, in *Proceedings of the 13th annual convention of natural gasoline association of america*, 1951, pp. 27–31.
- 190 J.-W. Lee and S.-P. Kang, [Phase equilibria of natural gas hydrates in the presence of methanol, ethylene glycol, and NaCl aqueous solutions](#), *Industrial & Engineering Chemistry Research*, 2011, **50**, 8750–8755.
- 191 D. H. Mei, J. Liao, J. T. Yang and T. M. Guo, [Hydrate formation of a synthetic natural gas mixture in aqueous solutions containing electrolyte, methanol, and \(electrolyte + methanol\)](#), *Journal of Chemical and Engineering Data*, 1998, **43**, 178–182.
- 192 I. Wilcox, D. B. Carson and D. L. Katz, Natural hydrates, *Industrial & Engineering Chemistry*, 1941, **33**, 662–665.
- 193 D. B. Robinson and H. J. Ng, [Hydrate formation and inhibition in gas or gas condensate streams.](#), *Journal of Canadian Petroleum Technology*, 1986, **25**, 26–30.

- 194 C. Eichholz, A. Majumdar, M. A. Clarke, L. R. Oellrich and P. R. Bishnoi, [Experimental investigation and calculation of methane hydrate formation conditions in the presence of ethylene glycol and sodium chloride](#), *Journal of Chemical & Engineering Data*, 2004, **49**, 847–851.
- 195 A. H. Mohammadi and D. Richon, [Gas hydrate phase equilibrium in methane + ethylene glycol, diethylene glycol, or triethylene glycol + water system](#), *Journal of Chemical & Engineering Data*, 2011, **56**, 4544–4548.
- 196 H. Haghighi, A. Chapoy, R. Burgess and B. Tohidi, [Experimental and thermodynamic modelling of systems containing water and ethylene glycol: Application to flow assurance and gas processing](#), *Fluid Phase Equilibria*, 2009, **276**, 24–30.
- 197 A. H. Mohammadi and D. Richon, Phase equilibria of methane hydrates in the presence of methanol and / or ethylene glycol aqueous solutions, *Ind. Eng. Chem. Res.*, 2010, **49**, 925–928.
- 198 P. D. Dholabhai, J. Scott Parent and P. Raj Bishnoi, [Equilibrium conditions for hydrate formation from binary mixtures of methane and carbon dioxide in the presence of electrolytes, methanol and ethylene glycol](#), *Fluid Phase Equilibria*, 1997, **141**, 235–246.
- 199 M. A. Aminolroayaei, Z. Taheri Rizi, M. Mohammad-Taheri, A. Kamran Pirzaman, M. Dehbandi Baladehi and M. R. Ehsani, Experimental measurements and thermodynamic modeling of CH<sub>4</sub> + H<sub>2</sub>S + MEG hydrate phase-equilibrium conditions at 6.2–12.3 MPa, *Journal of Chemical & Engineering Data*, DOI:[10.1021/acs.jced.2c00111](#).
- 200 H. Haghighi, A. Chapoy, R. Burgess, S. Mazloun and B. Tohidi, [Phase equilibria for petroleum reservoir fluids containing water and aqueous methanol solutions: Experimental measurements and modelling using the CPA equation of state](#), *Fluid Phase Equilibria*, 2009, **278**, 109–116.

201 Q. Nasir, K. K. Lau, B. Lal and K. M. Sabil, [Hydrate dissociation condition measurement of CO<sub>2</sub>-rich mixed gas in the presence of methanol/ethylene glycol and mixed methanol/ethylene glycol + electrolyte aqueous solution](#), *Journal of Chemical & Engineering Data*, 2014, **59**, 3920–3926.
